# Supplementary material for: An efficient synthesis of gem-diiodoolefins and (E)-iodoalkenes from propargylic amides with a Cu(i)/Cu(iii) cycle
Source: Royal Society of Chemistry journal article supplement (doi:10.1039/c5qo00043b), 2015-01-01
Supplement: c5qo00043b1.pdf [file c5qo00043b1.pdf]

# Supporting Information

## An Efficient Synthesis of gem-Diiodoolefins and (*E*)-iodoalkenes from Propargylic Amides with Cu(I)/Cu(III) Cycle

Shuo Zhang,<sup>[a]</sup> Ying Chen,<sup>[a]</sup> Jianwu Wang,<sup>\*[a]</sup> Yue Pan,<sup>[a]</sup> Zhenghu Xu<sup>\*[a,b]</sup> and Chen-Ho Tung<sup>[a]</sup>

[a] Key Lab for Colloid and Interface Chemistry of Education Ministry School of chemistry and Chemical Engineering, Shandong University Jinan 250100, PR China.

E-mail: xuzh@sdu.edu.cn; jwwang@sdu.edu.cn

[b] State Key Laboratory of Organometallic Chemistry Shanghai Institute of Organic Chemistry, Chinese Academy of Sciences Shanghai 200032, PR China

[c] Key Laboratory of Photochemical Conversion and Optoelectronic Materials, Technical Institute of Physics and Chemistry, Chinese Academy of Sciences, Beijing 100190, PR China.

†

|                                          |     |
|------------------------------------------|-----|
| General information.....                 | S2  |
| Synthesis of the starting materials..... | S2  |
| Synthetic applications.....              | S8  |
| Optimization of reaction conditions..... | S11 |
| Characterization Data.....               | S12 |
| NMR spectra for the products.....        | S21 |

## General information

Unless otherwise noted, all the reagents were obtained commercially and used without further purification and reactions were monitored by TLC.

All NMR spectra were recorded on Bruker-400 MHz spectrometer or Bruker-300 MHz. HRMS were measured on the Q-TOF6510 instruments.

## Synthesis of the starting materials

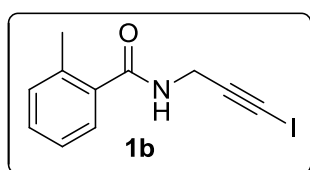

Yield: ( 2.10g, 70%).  $^1\text{H}$  NMR (400 MHz,  $\text{CDCl}_3$ )  $\delta$  7.36-7.31 (m, 2H), 7.22-7.17 (m, 2H), 5.98 (s, 1H), 4.36 (d,  $J = 5.3$  Hz, 2H), 2.43 (s, 3H).  $^{13}\text{C}$  NMR (100 MHz,  $\text{CDCl}_3$ )  $\delta$  169.46, 136.43, 135.36, 131.15, 130.24, 126.77, 125.78, 89.54, 31.43, 19.82, 0.03. HRMS (ESI,  $m/z$ ) calcd for  $\text{C}_{11}\text{H}_{10}\text{INO}$   $[\text{M}+\text{H}]^+$  299.9880, found 299.9882.

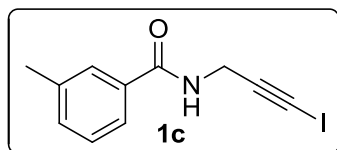

Yield: (2.15g, 72%).  $^1\text{H}$  NMR (400 MHz,  $\text{DMSO-d}_6$ )  $\delta$  8.85 (s, 1H), 7.65-7.61 (m, 2H), 7.32 (d,  $J = 4.1$  Hz, 2H), 4.14 (d,  $J = 5.4$  Hz, 2H), 2.33 (s, 3H).  $^{13}\text{C}$  NMR (100 MHz,  $\text{CDCl}_3$ )  $\delta$  166.41, 138.09, 134.18, 132.48, 128.70, 128.31, 124.86, 90.67, 30.84, 21.39, 8.04. HRMS (ESI,  $m/z$ ) calcd for  $\text{C}_{11}\text{H}_{10}\text{INO}$   $[\text{M}+\text{H}]^+$  299.9880, found 299.9886.

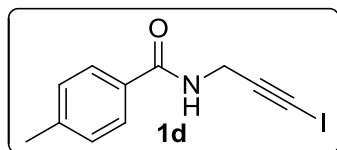

Yield: (2.0g, 67%).  $^1\text{H}$  NMR (400 MHz,  $\text{DMSO-d}_6$ )  $\delta$  8.82 (s, 1H), 7.73 (d,  $J = 7.5$  Hz, 2H), 7.24 (d,  $J = 6.8$  Hz, 2H), 4.14 (d,  $J = 5.3$  Hz, 2H), 2.32 (s, 3H).  $^{13}\text{C}$  NMR (100 MHz,  $\text{CDCl}_3$ )  $\delta$  166.19, 141.85, 131.38, 129.35, 127.76, 90.75, 30.81, 21.44, 8.07. HRMS (ESI,  $m/z$ ) calcd for  $\text{C}_{11}\text{H}_{10}\text{INO}$   $[\text{M}+\text{H}]^+$  299.9880, found 299.9885.

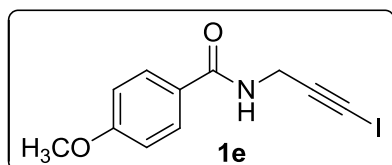

Yield: (1.73g, 1.55%).  $^1\text{H}$  NMR (400 MHz,  $\text{CDCl}_3$ )  $\delta$  7.75 (d,  $J = 8.7$  Hz, 2H), 6.92 (d,

$J = 8.8\text{Hz}$ , 2H), 6.25 (s, 1H), 4.40 (d,  $J = 5.2\text{ Hz}$ , 2H), 3.85 (s, 3H).  $^{13}\text{C}$  NMR (100 MHz,  $\text{CDCl}_3$ )  $\delta$  165.35, 161.69, 129.11, 125.85, 113.49, 90.36, 55.29, 30.32, 7.47. HRMS (ESI,  $m/z$ ) calcd for  $\text{C}_{11}\text{H}_{10}\text{INO}_2$   $[\text{M}+\text{H}]^+$  315.9829, found 315.9836.

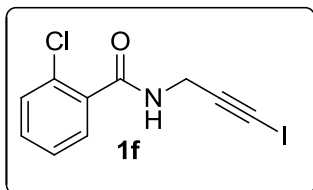

Yield: (1.44g, 45%).  $^1\text{H}$  NMR (400 MHz,  $\text{DMSO-d}_6$ )  $\delta$  8.86 (s, 1H), 7.48-7.34 (m, 4H), 4.13 (d,  $J = 5.5\text{ Hz}$ , 2H).  $^{13}\text{C}$  NMR (100 MHz,  $\text{DMSO-d}_6$ )  $\delta$  165.94, 136.11, 130.94, 129.91, 129.63, 128.84, 127.06, 89.49, 30.21, 8.12. HRMS (ESI,  $m/z$ ) calcd for  $\text{C}_{10}\text{H}_7\text{ClINO}$   $[\text{M}+\text{H}]^+$  319.9334, found 319.9334.

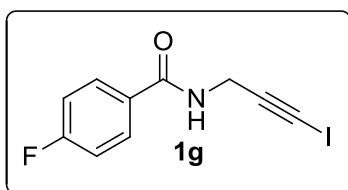

Yield: (1.88g, 62%).  $^1\text{H}$  NMR (400 MHz,  $\text{CDCl}_3$ )  $\delta$  7.78 (t,  $J = 6.8\text{ Hz}$ , 2H), 7.11 (d,  $J = 8.1\text{Hz}$ , 2H), 6.35 (s, 1H), 4.39 (d,  $J = 4.6\text{ Hz}$ , 2H).  $^{13}\text{C}$  NMR (75 MHz,  $\text{DMSO-d}_6$ )  $\delta$  165.80, 164.97, 162.51, 130.29, 130.25, 130.17, 130.05, 115.57, 115.28, 90.18, 30.62, 8.03. HRMS (ESI,  $m/z$ ) calcd for  $\text{C}_{10}\text{H}_7\text{FINO}$   $[\text{M}+\text{H}]^+$  303.9629, found 303.9628.

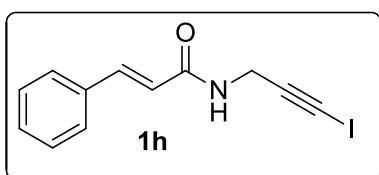

Yield: (1.77g, 57%).  $^1\text{H}$  NMR (400 MHz,  $\text{DMSO-d}_6$ )  $\delta$  8.54 (s, 1H), 7.53 (d,  $J = 6.7\text{ Hz}$ , 2H), 7.41-7.35 (m, 4H), 6.59 (d,  $J = 15.8\text{ Hz}$ , 1H), 4.10 (d,  $J = 5.1\text{ Hz}$ , 2H).  $^{13}\text{C}$  NMR (100 MHz,  $\text{CDCl}_3$ )  $\delta$  165.10, 139.91, 135.19, 130.08, 129.41, 128.06, 121.86, 90.36, 30.42, 8.59. HRMS (ESI,  $m/z$ ) calcd for  $\text{C}_{12}\text{H}_{10}\text{INO}$   $[\text{M}+\text{H}]^+$  311.9880, found 311.9881.

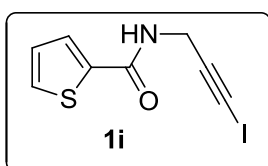

Yield: (1.89g, 65%).  $^1\text{H}$  NMR (300 MHz,  $\text{DMSO-d}_6$ )  $\delta$  8.97 (t,  $J = 5.4\text{ Hz}$ , 1H), 7.79-7.77 (m, 2H), 7.17-7.14 (m, 1H), 4.17 (d,  $J = 5.7\text{ Hz}$ , 2H).  $^{13}\text{C}$  NMR (75 MHz,  $\text{DMSO-d}_6$ )  $\delta$  160.77, 139.11, 131.17, 128.45, 127.97, 89.90, 30.21, 8.10. HRMS (ESI,  $m/z$ ) calcd for  $\text{C}_8\text{H}_6\text{INOS}$   $[\text{M}+\text{H}]^+$  291.9288, found 291.9289.

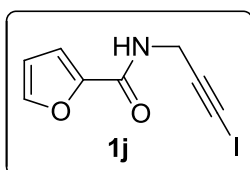

Yield: (1.93g, 70%).  $^1\text{H}$  NMR (400 MHz,  $\text{CDCl}_3$ )  $\delta$  7.44 (s, 1H), 7.12 (d,  $J = 3.4\text{ Hz}$ , 1H), 6.63 (s, 1H), 6.49 (dd,  $J_1 = 3.2\text{ Hz}$ ,  $J_2 = 1.5\text{ Hz}$ , 1H), 4.36 (d,  $J = 5.6\text{ Hz}$ , 2H).  $^{13}\text{C}$  NMR (100 MHz,  $\text{CDCl}_3$ )  $\delta$  157.84, 147.37, 144.22, 112.24, 89.33, 33.98, 30.68, 0.19. HRMS (ESI,  $m/z$ ) calcd for  $\text{C}_8\text{H}_6\text{INO}_2$   $[\text{M}+\text{H}]^+$  275.9516, found 275.9518.

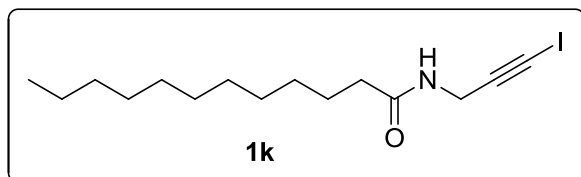

Yield: (2.36g, 65%).  $^1\text{H}$  NMR (400 MHz,  $\text{CDCl}_3$ )  $\delta$  5.71 (s, 1H), 4.20 (d,  $J = 5.3\text{ Hz}$ , 2H), 2.18 (t,  $J = 7.5\text{ Hz}$ , 2H), 1.62 (t,  $J = 6.8\text{ Hz}$ , 2H), 1.28-1.25 (m, 16H), 0.87 (t,  $J = 6.4\text{ Hz}$ ).  $^{13}\text{C}$  NMR (100 MHz,  $\text{CDCl}_3$ )  $\delta$  172.67, 100.06, 89.85, 36.48, 32.76, 31.90, 30.99, 29.60, 29.47, 29.33, 29.26, 25.55, 22.68, 14.11. HRMS (ESI,  $m/z$ ) calcd for  $\text{C}_{15}\text{H}_{26}\text{INO}$   $[\text{M}+\text{H}]^+$  364.1132, found 364.1141.

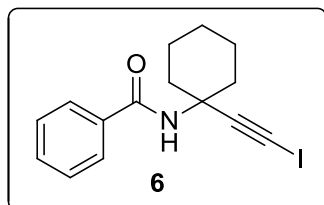

Yield: (2.47g, 70%).  $^1\text{H}$  NMR (400 MHz,  $\text{CDCl}_3$ )  $\delta$  7.75 (d,  $J = 7.2\text{ Hz}$ , 2H), 7.49-7.40 (m, 3H), 6.09 (s, 1H), 3.09-3.05 (m, 2H), 2.23-1.93 (m, 2H), 1.71-1.60 (m, 5H), 1.42-1.35 (m, 1H).  $^{13}\text{C}$  NMR (75 MHz,  $\text{DMSO-d}_6$ )  $\delta$  165.82, 134.96, 131.06, 128.04, 127.50, 95.62, 52.65, 36.41, 24.91, 22.01, 6.95. HRMS (ESI,  $m/z$ ) calcd for  $\text{C}_{15}\text{H}_{16}\text{INO}$   $[\text{M}+\text{H}]^+$  354.0349, found 354.0345.

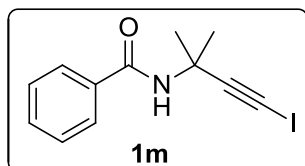

Yield: (2.13g, 68%).  $^1\text{H}$  NMR (400 MHz,  $\text{CDCl}_3$ )  $\delta$  7.74 (d,  $J = 7.2\text{ Hz}$ , 2H), 7.48 (d,  $J = 7.2\text{ Hz}$ , 1H), 7.41 (t,  $J = 7.7\text{ Hz}$ , 2H), 6.21 (s, 1H), 1.76 (s, 6H).  $^{13}\text{C}$  NMR (100 MHz,  $\text{CDCl}_3$ )  $\delta$  166.35, 134.88, 131.50, 128.54, 126.89, 97.38, 50.17, 29.03, -2.05. HRMS (ESI,  $m/z$ ) calcd for  $\text{C}_{12}\text{H}_{12}\text{INO}$   $[\text{M}+\text{H}]^+$  314.0036, found 314.0026.

General procedure for the synthesis of alkynyl amides **4a-4n**.

The corresponding Propynylamine (10 mmol) was dissolved in DCM, (30 mL). The solution was added triethylamine (24 mmol), chloride (12 mmol) and 4-dimethylaminopyridine (0.8 mmol), the resulting solution

was allowed to reach room temperature. The reaction was stirred at room temperature for 3h. And then was successively diluted with water. The aqueous layer was extracted with  $\text{CH}_2\text{Cl}_2$ , and the combined organic layers were washed with satd.  $\text{NaHCO}_3$  followed by water and brine, dried over  $\text{Na}_2\text{SO}_4$  and concentrated under reduced pressure to obtain the crude alkynyl amides. Silica gel chromatography gave the desired alkynyl amides **4a-4n**.

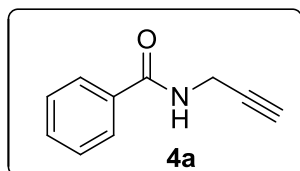

Known compound.  $^1\text{H}$  NMR (400 MHz,  $\text{CDCl}_3$ )  $\delta$  7.78 (d,  $J = 7.4$  Hz, 2H), 7.50-7.40 (m, 3H), 6.39 (s, 1H), 4.24 (dd,  $J_1 = 5.1$  Hz,  $J_2 = 2.5$  Hz, 2H), 2.27 (t,  $J = 2.4$  Hz, 1H).

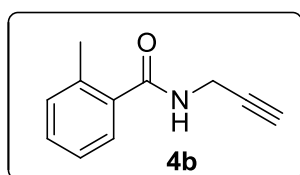

Known compound.  $^1\text{H}$  NMR (400 MHz,  $\text{CDCl}_3$ )  $\delta$  7.38-7.30 (m, 2H), 7.23-7.18 (m, 2H), 5.97 (s, 1H), 4.23 (dd,  $J_1 = 5.1$  Hz,  $J_2 = 2.4$  Hz, 2H), 2.45 (s, 3H), 2.27 (t,  $J = 2.4$  Hz, 1H).

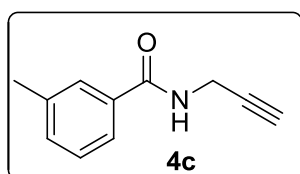

Known compound.  $^1\text{H}$  NMR (400 MHz,  $\text{CDCl}_3$ )  $\delta$  7.61-7.55 (m, 2H), 7.32-7.31 (m, 2H), 6.28 (s, 1H), 4.25 (dd,  $J_1 = 5.2$  Hz,  $J_2 = 2.5$  Hz, 2H), 2.40 (s, 3H), 2.28 (t,  $J = 2.4$  Hz, 1H).

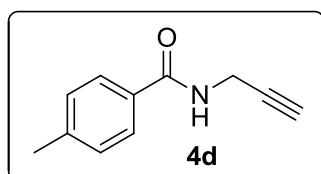

Known compound.  $^1\text{H}$  NMR (400 MHz,  $\text{CDCl}_3$ )  $\delta$  7.68 (d,  $J = 8.1$  Hz, 2H), 7.23 (d,  $J = 8.1$  Hz, 2H), 6.36 (s, 1H), 4.24 (dd,  $J_1 = 5.2$  Hz,  $J_2 = 2.5$  Hz, 2H), 2.39 (s, 3H), 2.27

(t,  $J = 2.4$  Hz, 1H).

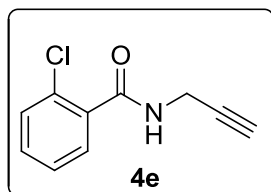

Known compound.  $^1\text{H NMR}$  (400 MHz,  $\text{CDCl}_3$ )  $\delta$  7.70 (d,  $J = 1.4$  Hz, 1H), 7.68-7.30 (m, 3H), 6.46 (s, 1H), 4.27 (dd,  $J_1 = 5.2$  Hz,  $J_2 = 2.5$  Hz, 2H), 2.29 (t,  $J = 2.6$  Hz, 1H).

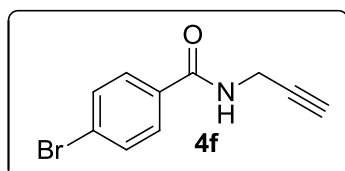

Known compound.  $^1\text{H NMR}$  (400 MHz,  $\text{CDCl}_3$ )  $\delta$  7.66 (d,  $J = 8.5$  Hz, 2H), 7.57 (d,  $J = 8.5$  Hz, 2H), 6.38 (s, 1H), 4.24 (dd,  $J_1 = 5.1$  Hz,  $J_2 = 2.5$  Hz, 2H), 2.28 (t,  $J = 2.5$  Hz, 1H)

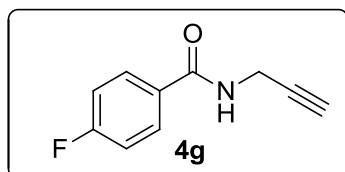

Known compound.  $^1\text{H NMR}$  (400 MHz,  $\text{CDCl}_3$ )  $\delta$  7.82-7.79 (m, 2H), 7.09 (t,  $J = 8.6$  Hz, 2H), 6.62 (s, 1H) 4.22 (dd,  $J_1 = 5.2$  Hz,  $J_2 = 2.5$  Hz, 2H), 2.27 (d,  $J = 2.6$  Hz, 1H).

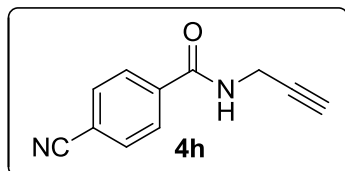

Known compound.  $^1\text{H NMR}$  (400 MHz,  $\text{CDCl}_3$ )  $\delta$  7.90 (d,  $J = 8.3$  Hz, 2H), 7.75 (d,  $J = 8.4$  Hz, 2H), 6.45 (s, 1H), 4.26 (dd,  $J_1 = 5.2$  Hz,  $J_2 = 2.6$  Hz, 2H), 2.30 (t,  $J = 2.5$  Hz, 1H).

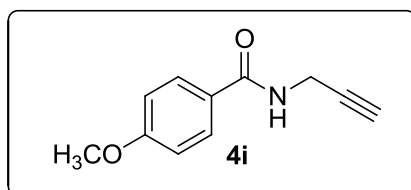

Known compound.  $^1\text{H NMR}$  (400 MHz,  $\text{CDCl}_3$ )  $\delta$  7.75 (d,  $J = 8.7$  Hz, 2H), 6.91 (d,  $J = 8.8$  Hz, 2H), 6.30 (s, 1H), 4.23 (dd,  $J_1 = 5.1$  Hz,  $J_2 = 2.4$  Hz, 2H), 3.84 (s, 3H).

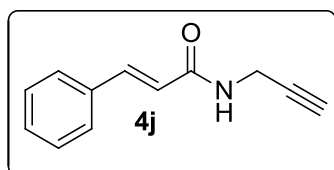

Known compound.  $^1\text{H NMR}$  (400 MHz,  $\text{CDCl}_3$ )  $\delta$  7.66 (d,  $J = 15.9$  Hz, 1H),

7.51-7.46 (m, 2H), 7.37-7.31 (m, 3H), 6.45 (d,  $J = 15.9$  Hz, 1H), 6.18 (s, 1H), 4.20 (dd,  $J_1 = 5.2$  Hz,  $J_2 = 2.5$  Hz, 2H), 2.26 (t,  $J = 2.5$  Hz, 1H)

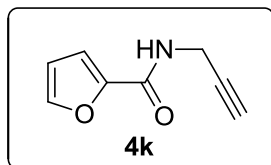

Known compound.  $^1\text{H NMR}$  (400 MHz,  $\text{CDCl}_3$ )  $\delta$  7.45 (d,  $J = 0.8$  Hz, 1H), 7.14 (d,  $J = 3.4$  Hz, 1H), 6.50 (dd,  $J_1 = 3.4$  Hz,  $J_2 = 1.7$  Hz, 2H), 4.23 (dd,  $J_1 = 5.4$  Hz,  $J_2 = 2.6$  Hz, 2H), 2.27 (t,  $J = 2.5$  Hz, 1H),

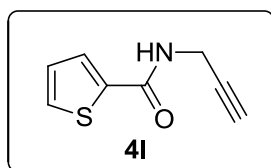

Known compound.  $^1\text{H NMR}$  (400 MHz,  $\text{CDCl}_3$ )  $\delta$  7.54 (d,  $J = 3.7$  Hz, 1H), 7.49 (d, 5.0 Hz, 1H), 7.08 (t,  $J = 4.1$  Hz, 1H), 6.22 (s, 1H), 4.22 (dd,  $J_1 = 5.1$  Hz,  $J_2 = 2.4$  Hz, 2H), 2.28 (t,  $J = 2.4$  Hz, 1H).

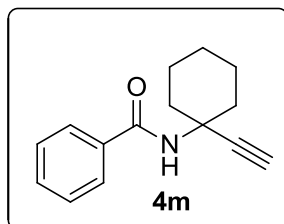

Known compound.  $^1\text{H NMR}$  (400 MHz,  $\text{CDCl}_3$ )  $\delta$  7.76-7.74 (m, 2H), 7.48-7.38 (m, 3H), 6.14 (s, 1H), 2.44 (s, 1H), 2.24-2.20 (m, 2H), 1.98-1.91 (m, 2H), 1.76-1.63 (m, 5H), 1.60-1.58 (m, 1H)

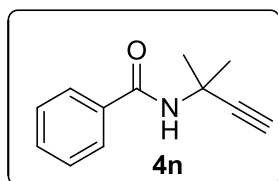

Known compound.  $^1\text{H NMR}$  (400 MHz,  $\text{CDCl}_3$ )  $\delta$  7.75-7.73 (m, 2H), 7.50-7.39 (m, 3H), 6.20 (s, 1H), 2.38 (s, 1H), 1.76 (s, 6H).

## Synthetic applications:

### Procedure for Synthesis of compound **11**

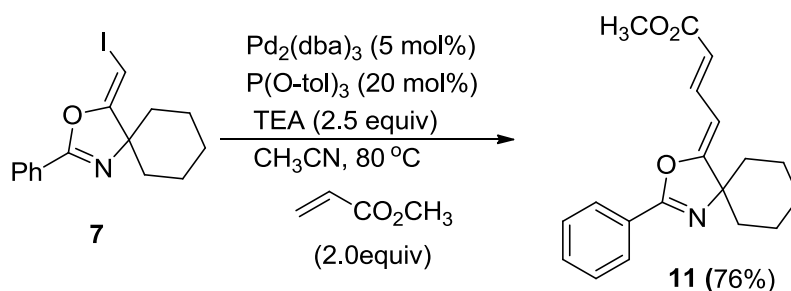

To a mixture of  $\text{Pd}_2(\text{dba})_3$  (0.01 mmol),  $\text{P}(\text{O-tol})_3$  (0.04 mmol), compound **10** (0.2 mmol) in  $\text{CH}_3\text{CN}$  (2 ml) under  $\text{N}_2$  atmosphere, methyl acrylate (0.4 mmol) and  $\text{Et}_3\text{N}$  (0.5 mmol) was added. The system was stirred at  $80^\circ\text{C}$  overnight. The resulting mixture was washed with water and extracted with DCM. The organic layer was filtered on celite and evaporated under reduced pressure. Purification by flash column chromatography afforded the desired product **11** (47.27 mg, 76%).

### Procedure for Synthesis of compound **12**

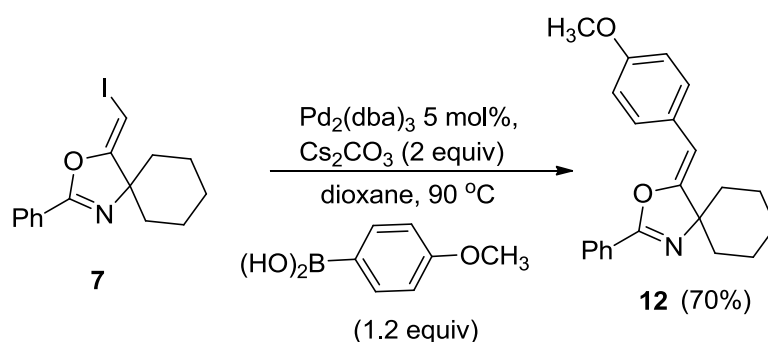

To a mixture of  $\text{Pd}_2\text{dba}_3$  (0.01 mmol),  $\text{Cs}_2\text{CO}_3$  (0.5 mmol), 4-Methoxyphenylboronic acid (0.24 mmol), compound **10** (0.2 mmol)



in dioxane (2 ml) under N<sub>2</sub> atmosphere was stirred at 90°C overnight. The resulting mixture was washed with water and extracted with DCM. The organic layer was filtered on celite and evaporated under reduced pressure. Purification by flash column chromatography afforded the desired product **12** (46.62 mg, 70%).

### Procedure for Synthesis of compound **13**

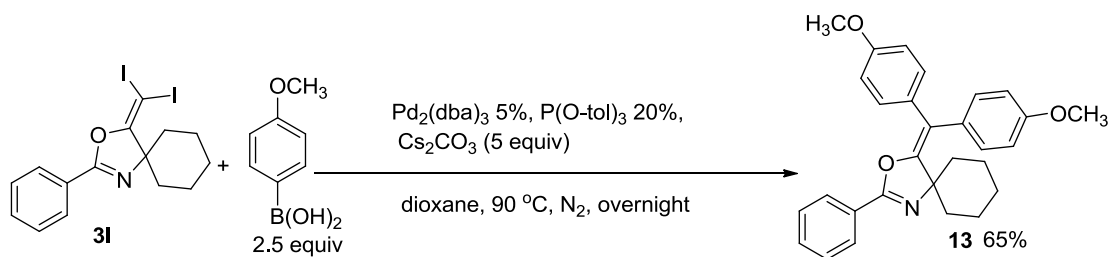

To a mixture of Pd<sub>2</sub>dba<sub>3</sub> (0.02 mmol), Cs<sub>2</sub>CO<sub>3</sub> (1 mmol), 4-Methoxyphenylboronic acid (0.5 mmol), compound **31** (0.2 mmol) in dioxane (2 ml) under N<sub>2</sub> atmosphere was stirred at 90°C overnight. The resulting mixture was washed with water and extracted with DCM. The organic layer was filtered on celite and evaporated under reduced pressure. Purification by flash column chromatography afforded the desired product **13** (57.07 mg, 65%).

### Procedure for Synthesis of compound **14**

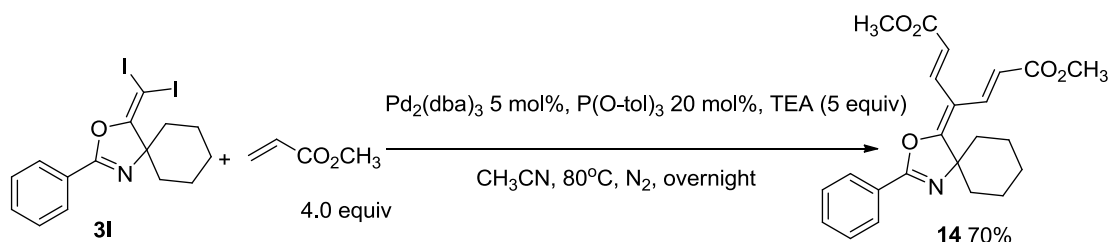

To a mixture of  $\text{Pd}_2(\text{dba})_3$  (0.02 mmol),  $\text{P}(\text{O-tol})_3$  (0.08 mmol), compound **21** (0.2 mmol) in  $\text{CH}_3\text{CN}$  (2 ml) under  $\text{N}_2$  atmosphere, compound **6** (0.24 mmol) and  $\text{Et}_3\text{N}$  (1 mmol) was added. The system was stirred at  $80^\circ\text{C}$  overnight. The resulting mixture was washed with water and extracted with DCM. The organic layer was filtered on celite and evaporated under reduced pressure. Purification by flash column chromatography afforded the desired product **14** (55.3 mg, 70%).

#### Procedure for Synthesis of compound **15**

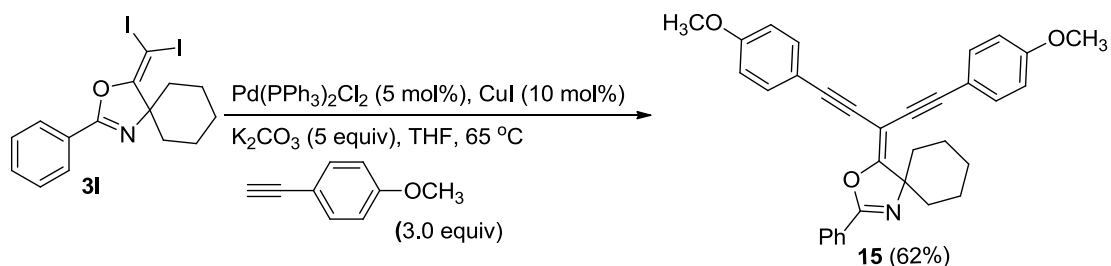

To a mixture of  $\text{Pd}(\text{PPh}_3)_2\text{Cl}_2$  (0.02 mmol),  $\text{CuI}$  (0.04 mmol),  $\text{K}_2\text{CO}_3$  (1 mmol), compound **31** (0.2 mmol) in THF (2 ml) under  $\text{N}_2$  atmosphere, 4-Methoxyphenylacetylene (0.6 mmol) was added. The system was stirred at  $65^\circ\text{C}$  overnight. The resulting mixture was washed with water and extracted with DCM. The organic layer was filtered on celite and evaporated under reduced pressure. Purification by flash column chromatography afforded the desired product **15** (58.44 mg, 62%).

## Optimization of reaction conditions:

Table 1. Optimization of Reaction Conditions

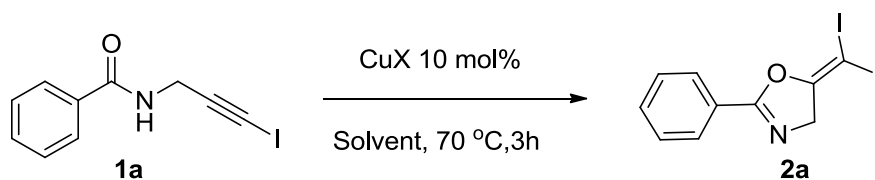

| Entry | Catalyst                                              | Solvent            | Yield(%) <sup>a</sup> |
|-------|-------------------------------------------------------|--------------------|-----------------------|
| 1     | CuI                                                   | DCE                | 90                    |
| 2     | CuCl                                                  | DCE                | 86                    |
| 3     | CuBr                                                  | DCE                | 72                    |
| 4     | Cu(acac) <sub>2</sub>                                 | DCE                | 75                    |
| 5     | CuSO <sub>4</sub>                                     | DCE                | 95                    |
| 6     | 1,10-Phen-CuI                                         | DCE                | 83                    |
| 7     | IPRCuI                                                | DCE                | 69                    |
| 8     | CuCl <sub>2</sub>                                     | DCE                | 79                    |
| 9     | Cu(OAc) <sub>2</sub>                                  | DCE                | 75                    |
| 10    | Cu(PF <sub>4</sub> )(CH <sub>3</sub> CN) <sub>4</sub> | DCE                | 50                    |
| 11    | Cu(PF <sub>4</sub> ) <sub>2</sub>                     | DCE                | 46                    |
| 12    | Cu(NO <sub>3</sub> ) <sub>2</sub>                     | DCE                | 40                    |
| 13    | Cu(ClO <sub>4</sub> ) <sub>2</sub>                    | DCE                | 43                    |
| 14    | CuSO <sub>4</sub>                                     | CH <sub>3</sub> CN | 26                    |
| 15    | CuSO <sub>4</sub>                                     | Dioxane            | 76                    |
| 16    | CuSO <sub>4</sub>                                     | THF                | 84                    |
| 17    | CuSO <sub>4</sub>                                     | Toluene            | 75                    |

a: Isolated yields were reported. Reaction conditions: **1a** (0.1 mmol) , CuX (0.01 mmol) in solvent (1 mL) was stirred at 70 °C for 3 h.

## Characterization Data

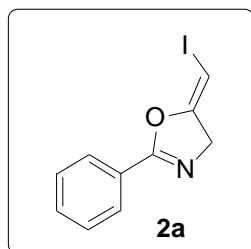

$^1\text{H}$  NMR (300 MHz, DMSO- $d_6$ )  $\delta$  7.89-7.86 (m, 2H), 7.62-7.57 (m, 1H), 7.54-7.49 (m, 2H), 5.44 (t,  $J$  = 2.4 Hz, 1H), 4.67 (d,  $J$  = 2.4 Hz, 2H).  $^{13}\text{C}$  NMR (75 MHz, DMSO- $d_6$ )  $\delta$  161.14, 159.58, 132.77, 129.41, 128.05, 126.24, 58.45, 43.72. HRMS (ESI,  $m/z$ ) calcd for  $\text{C}_{10}\text{H}_8\text{INO}$  [ $\text{M}+\text{H}$ ] $^+$  285.9723, found 285.9719.

Condition A:

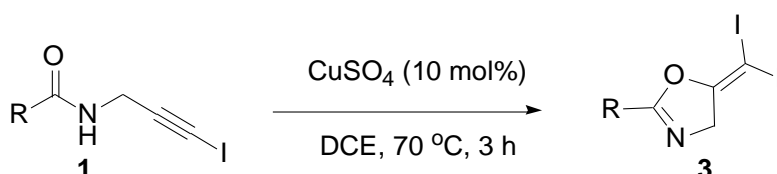

[a] Reaction conditions: **1** (0.2 mmol),  $\text{CuSO}_4$  (0.02 mmol) in DCE (2 mL) was stirred at 70  $^\circ\text{C}$  for 3 h. Isolated yields were reported.

Condition B:

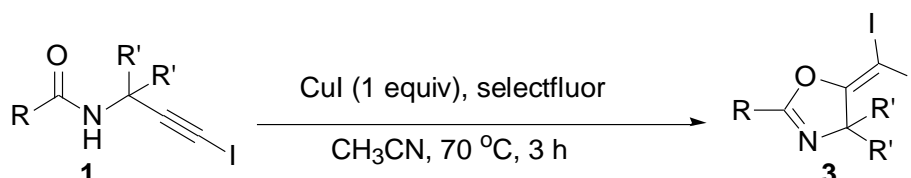

[a] Reaction conditions: **1a** (0.2 mmol),  $\text{CuI}$  (0.2 mmol), selectfluor (0.24 mmol), in  $\text{CH}_3\text{CN}$  (2 mL) was stirred at 70  $^\circ\text{C}$  for 3 h. Isolated yields were reported.

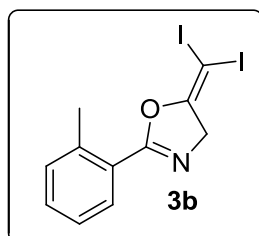

Yield: condition A (41.13 mg, 97%), condition B (75.47 mg, 89%)  $^1\text{H}$  NMR (300 MHz, DMSO- $d_6$ )  $\delta$  7.79-7.76 (m, 1H), 7.52-7.46 (m, 1H), 7.36 (t,  $J$  = 7.2 Hz, 2H), 4.64 (s, 2H), 2.57 (s, 3H).  $^{13}\text{C}$  NMR (75 MHz, DMSO- $d_6$ )  $\delta$  161.13, 158.50, 138.60, 131.64, 131.61, 129.21, 126.11, 125.03, 61.41, 21.50, -16.01. HRMS (ESI,  $m/z$ ) calcd for  $\text{C}_{11}\text{H}_9\text{I}_2\text{NO}$  [ $\text{M}+\text{H}$ ] $^+$  425.8846, found 425.8845.

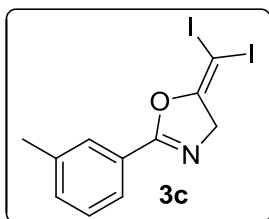

Yield: condition A (40.28 mg, 95%), condition B (77.17 mg, 91%)  $^1\text{H}$  NMR (400 MHz,  $\text{CDCl}_3$ )  $\delta$  7.78-7.75 (m, 2H), 7.35 (d,  $J = 5.3$  Hz, 2H), 4.61 (s, 2H), 2.41 (s, 3H).  $^{13}\text{C}$  NMR (100 MHz,  $\text{DMSO-d}_6$ )  $\delta$  160.99, 158.71, 138.38, 133.09, 128.91, 127.72, 125.86, 124.66, 61.11, 20.86, -15.53. HRMS (ESI,  $m/z$ ) calcd for  $\text{C}_{11}\text{H}_9\text{I}_2\text{NO}$   $[\text{M}+\text{H}]^+$  425.8846, found 425.8845.

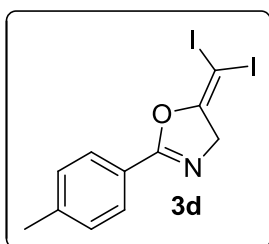

Yield: condition A (41.13 mg, 97%), condition B (74.63 mg, 88%)  $^1\text{H}$  NMR (400 MHz,  $\text{CDCl}_3$ )  $\delta$  7.86 (d,  $J = 8.0$  Hz, 2H), 7.26 (d,  $J = 7.7$  Hz, 2H), 4.61 (s, 2H), 2.42 (s, 3H).  $^{13}\text{C}$  NMR (100 MHz,  $\text{DMSO-d}_6$ )  $\delta$  160.91, 158.76, 142.62, 129.58, 127.40, 123.15, 61.07, 21.14, -15.72. HRMS (ESI,  $m/z$ ) calcd for  $\text{C}_{11}\text{H}_9\text{I}_2\text{NO}$   $[\text{M}+\text{H}]^+$  425.8846, found 425.8850.

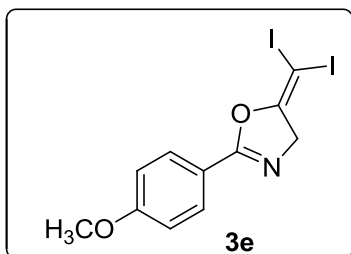

Yield: condition A (38.28 mg, 87%), condition B (79.21 mg, 91%)  $^1\text{H}$  NMR (400 MHz,  $\text{DMSO-d}_6$ )  $\delta$  7.78 (d,  $J = 8.7$  Hz, 2H), 7.07 (d,  $J = 8.7$  Hz, 2H), 4.54 (s, 2H), 3.80 (s, 3H).  $^{13}\text{C}$  NMR (75 MHz,  $\text{DMSO-d}_6$ )  $\delta$  162.39, 160.66, 158.83, 129.30, 118.09, 114.44, 61.01, 55.46, -15.92. HRMS (ESI,  $m/z$ ) calcd for  $\text{C}_{11}\text{H}_9\text{I}_2\text{NO}_2$   $[\text{M}+\text{H}]^+$  441.8795, found 441.8793.

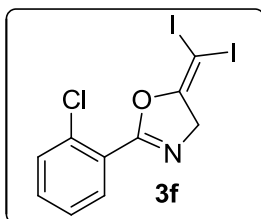

Yield: condition A (32.49 mg, 73%), condition B (71.11 mg, 80%)  $^1\text{H}$  NMR (400 MHz,  $\text{CDCl}_3$ )  $\delta$  7.87-7.85 (m, 1H), 7.49-7.43 (m, 2H), 7.39-7.34 (m, 1H), 4.68 (s, 2H).  $^{13}\text{C}$  NMR (100 MHz,  $\text{DMSO-d}_6$ )  $\delta$  159.83, 158.91, 133.64, 132.69, 131.79,

131.44, 128.03, 125.89, 61.91, -14.62. HRMS (ESI, m/z) calcd for C<sub>10</sub>H<sub>6</sub>ClI<sub>2</sub>NO [M+H]<sup>+</sup> 445.8300, found 445.8300.

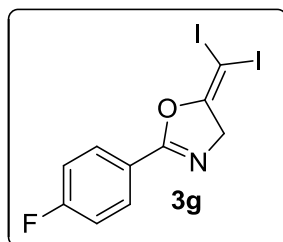

Yield: condition A (30.89 mg, 72%), condition B (64.35 mg, 75%) <sup>1</sup>H NMR (300 MHz, DMSO-d<sub>6</sub>) δ 7.92-7.88 (m, 2H), 7.41-7.35, (m, 2H), 4.58, (s, 2H). <sup>13</sup>C NMR (100 MHz, DMSO-d<sub>6</sub>) δ 166.15, 163.66, 160.54, 159.08, 130.63, 130.54, 122.99, 122.97, 116.83, 116.61, 61.67, -14.87. HRMS (ESI, m/z) calcd for C<sub>10</sub>H<sub>6</sub>FI<sub>2</sub>NO [M+H]<sup>+</sup> 429.8596, found 429.8578.

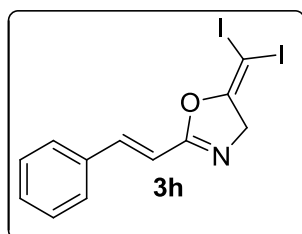

Yield: condition A (38.02 mg, 87%), condition B (71.67 mg, 82%) <sup>1</sup>H NMR (400 MHz, DMSO-d<sub>6</sub>) δ 7.68-7.67 (m, 2H), 7.40-7.38 (m, 4H), 6.79 (d, *J* = 16.3 Hz, 1H), 4.50 (s, 2H). <sup>13</sup>C NMR (100 MHz, DMSO-d<sub>6</sub>) δ 161.50, 158.97, 141.11, 134.78, 130.59, 129.41, 128.46, 114.46, 61.73, -15.77. HRMS (ESI, m/z) calcd for C<sub>12</sub>H<sub>9</sub>I<sub>2</sub>NO [M+H]<sup>+</sup> 437.8846, found 437.8843.

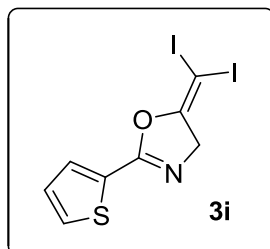

Yield: condition A (39.20 mg, 94%), condition B (75.06 mg, 90%) <sup>1</sup>H NMR (300 MHz, DMSO-d<sub>6</sub>) δ 7.91 (s, *J* = 3.8 Hz, 1H), 7.64 (d, *J* = 3.9 Hz, 1H), 7.23 (t, *J* = 3.9 Hz, 1H), 4.57, (s, 2H). <sup>13</sup>C NMR (100 MHz, DMSO-d<sub>6</sub>) δ 158.89, 157.31, 132.80, 131.65, 128.87, 128.45, 61.57, -14.70. HRMS (ESI, m/z) calcd for C<sub>8</sub>H<sub>5</sub>I<sub>2</sub>NOS [M+H]<sup>+</sup> 417.8254, found 417.8254.

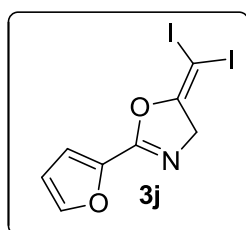

Yield: condition A (39.28 mg, 98%), condition B (73.78 mg, 92%) <sup>1</sup>H NMR (400

MHz, DMSO-d<sub>6</sub>) δ 7.97 (s, 1H), 7.12 (d, *J* = 3.3 Hz, 1H), 6.69 (q, *J* = 1.5 Hz, 1H), 4.55 (s, 2H). <sup>13</sup>C NMR (100 MHz, DMSO-d<sub>6</sub>) δ 158.53, 153.81, 147.69, 141.28, 116.34, 112.77, 61.47, -14.74. HRMS (ESI, *m/z*) calcd for C<sub>8</sub>H<sub>5</sub>I<sub>2</sub>NO [M+H]<sup>+</sup> 401.8482, found 401.8485.

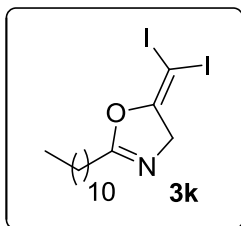

Yield: condition A (27.38 mg, 56%), condition B (76.28 mg, 78%) <sup>1</sup>H NMR (400 MHz, DMSO-d<sub>6</sub>) δ 4.31 (s, 2H), 2.30 (t, *J* = 6.9 Hz, 2H), 1.53 (t, *J* = 6.6 Hz, 2H), 1.28-1.21 (m, 16H), 0.83 (t, *J* = 5.8 Hz, 3H). <sup>13</sup>C NMR (100 MHz, DMSO-d<sub>6</sub>) δ 61.14, 31.78, 29.47, 29.33, 29.21, 29.08, 28.76, 27.93, 25.23, 22.59, 14.44, -16.48. HRMS (ESI, *m/z*) calcd for C<sub>15</sub>H<sub>25</sub>I<sub>2</sub>NO [M+H]<sup>+</sup> 490.0098, found 490.0099.

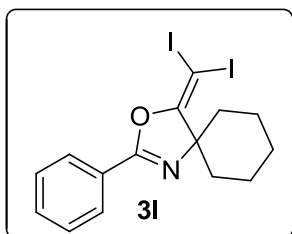

Yield: condition B (84.30 mg, 88%) <sup>1</sup>H NMR (400 MHz, CDCl<sub>3</sub>) δ 8.00-7.97 (m, 2H), 7.51-7.42, (m, 3H), 2.59-2.52, (m, 2H), 1.94- 1.58 (m, 7H), 1.41-1.35 (m, 1H). <sup>13</sup>C NMR (100 MHz, DMSO-d<sub>6</sub>) δ 163.77, 155.69, 131.89, 128.53, 128.34, 126.20, 77.43, 77.11, 76.79, 75.53, 33.95, 25.48, 22.34, -24.04. HRMS (ESI, *m/z*) calcd for C<sub>15</sub>H<sub>15</sub>I<sub>2</sub>NO [M+H]<sup>+</sup> 479.9316, found 479.9327.

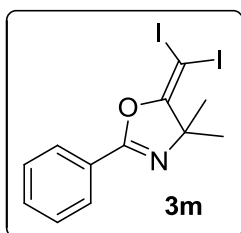

Yield: condition B (72.87 mg, 83%) <sup>1</sup>H NMR (400 MHz, CDCl<sub>3</sub>) δ 7.95-7.93 (m, 2H), 7.54-7.42, (m, 3H), 1.69 (s, 6H). <sup>13</sup>C NMR (100 MHz, DMSO-d<sub>6</sub>) δ 163.32, 155.92, 132.88, 129.47, 128.08, 125.81, 71.83, 26.10, -14.55. HRMS (ESI, *m/z*) calcd for C<sub>12</sub>H<sub>11</sub>I<sub>2</sub>NO [M+H]<sup>+</sup> 439.9003, found 439.8956.

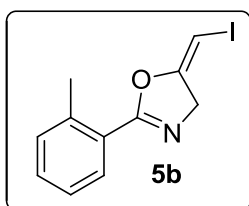

Yield: (55.02 mg, 92%) <sup>1</sup>H NMR (300 MHz, DMSO-d<sub>6</sub>) δ 7.72-7.69 (m, 2H),

7.43-7.41(m, 2H), 6.05 (t,  $J = 4.0$  Hz, 1H), 4.61(d,  $J = 4.0$  Hz, 2H), 2.37(s, 3H).  $^{13}\text{C}$  NMR (75 MHz, DMSO- $d_6$ )  $\delta$  162.45, 157.46, 138.34, 132.90, 128.84, 127.86, 126.03, 124.68, 60.44, 49.20, 20.78. HRMS (ESI,  $m/z$ ) calcd for  $\text{C}_{11}\text{H}_{10}\text{INO}$  [ $\text{M}+\text{H}$ ] $^+$  299.9880, found 299.9879.

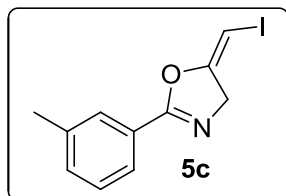

Yield: (49.64 mg, 83%)  $^1\text{H}$  NMR (300 MHz, DMSO- $d_6$ )  $\delta$  7.72-7.69 (m, 2H), 7.43-7.41, (m, 2H), 6.05 (t,  $J = 3.1$  Hz, 1H), 4.61(d,  $J = 3.3$  Hz, 2H), 2.37 (s, 3H).  $^{13}\text{C}$  NMR (75 MHz, DMSO- $d_6$ )  $\delta$  162.45, 157.46, 138.34, 132.90, 128.84, 127.86, 126.03, 124.68, 60.43, 20.77. HRMS (ESI,  $m/z$ ) calcd for  $\text{C}_{11}\text{H}_{10}\text{INO}$  [ $\text{M}+\text{H}$ ] $^+$  299.9880, found 299.9885.

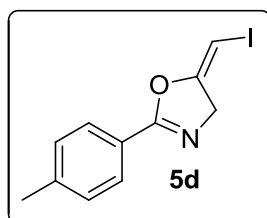

Yield: (53.22 mg, 89%)  $^1\text{H}$  NMR (300 MHz, DMSO- $d_6$ )  $\delta$  7.79 (d,  $J = 8.4$  Hz, 2H), 7.34 (d,  $J = 8.1$  Hz, 2H), 6.04 (t,  $J = 3.0$  Hz, 1H), 4.59 (d,  $J = 3.3$  Hz, 2H), 2.38 (s, 3H).  $^{13}\text{C}$  NMR (75 MHz, DMSO- $d_6$ )  $\delta$  162.39, 157.49, 142.40, 129.49, 127.46, 123.33, 60.40, 49.08, 21.10. HRMS (ESI,  $m/z$ ) calcd for  $\text{C}_{11}\text{H}_{10}\text{INO}$  [ $\text{M}+\text{H}$ ] $^+$  299.9880, found 299.9879.

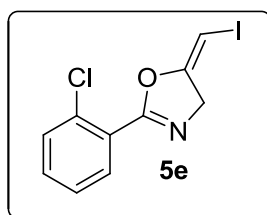

Yield: (46.08 mg, 72%)  $^1\text{H}$  NMR (400 MHz, DMSO- $d_6$ )  $\delta$  7.77 (d,  $J = 7.6$  Hz, 1H), 7.58 (t,  $J = 6.7$  Hz, 2H), 7.45(t,  $J = 7.4$  Hz, 1H), 6.02 (t,  $J = 2.9$  Hz, 1H). 4.62(d,  $J = 3.0$  Hz, 2H).  $^{13}\text{C}$  NMR (100 MHz, DMSO- $d_6$ )  $\delta$  161.24, 157.51, 133.49, 132.58, 131.79, 131.30, 127.98, 126.24, 61.33, 50.10. HRMS (ESI,  $m/z$ ) calcd for  $\text{C}_{10}\text{H}_7\text{ClINO}$  [ $\text{M}+\text{H}$ ] $^+$  319.9334, found 319.9334.

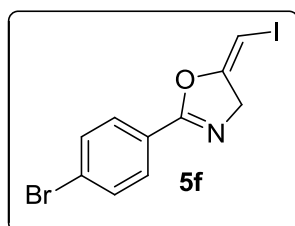

Yield: (53.14 mg, 73%)  $^1\text{H}$  NMR (400 MHz, DMSO- $d_6$ )  $\delta$  7.79 (d,  $J = 8.4$  Hz, 2H),



7.72 (d,  $J = 8.4$  Hz, 2H), 6.05 (t,  $J = 3.0$  Hz, 1H), 4.58 (d,  $J = 3.0$  Hz, 2H).  $^{13}\text{C}$  NMR (100 MHz, DMSO- $d_6$ )  $\delta$  162.21, 157.74, 132.55, 129.91, 126.53, 125.76, 61.02, 50.13. HRMS (ESI,  $m/z$ ) calcd for  $\text{C}_{10}\text{H}_7\text{BrINO}$   $[\text{M}+\text{H}]^+$  363.8828, found 363.8828.

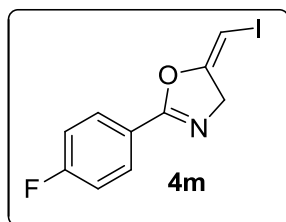

Yield: (41.21 mg, 68%)  $^1\text{H}$  NMR (300 MHz, DMSO- $d_6$ )  $\delta$  7.99-7.92 (m, 2H), 7.42-7.34 (m, 2H), 6.07 (t,  $J = 3.3$  Hz, 1H), 4.61 (d,  $J = 3.3$  Hz, 2H).  $^{13}\text{C}$  NMR (75 MHz, DMSO- $d_6$ )  $\delta$  165.99, 162.67, 161.52, 157.38, 130.24, 130.12, 122.71, 122.67, 116.30, 116.00, 60.45, 49.45. HRMS (ESI,  $m/z$ ) calcd for  $\text{C}_{10}\text{H}_7\text{FINO}$   $[\text{M}+\text{H}]^+$  303.9629, found 303.9627.

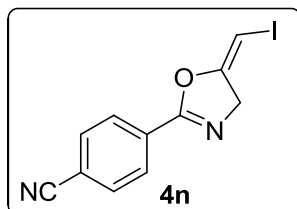

Yield: (45.88 mg, 74%)  $^1\text{H}$  NMR (400 MHz, DMSO- $d_6$ )  $\delta$  8.21-8.01 (m, 4H), 6.11 (s, 1H), 4.65 (s, 2H).  $^{13}\text{C}$  NMR (100 MHz, DMSO- $d_6$ )  $\delta$  161.81, 157.51, 133.39, 130.62, 128.69, 118.53, 114.96, 61.14, 50.51. HRMS (ESI,  $m/z$ ) calcd for  $\text{C}_{11}\text{H}_7\text{IN}_2\text{O}$   $[\text{M}+\text{H}]^+$  310.9676, found 310.9686.

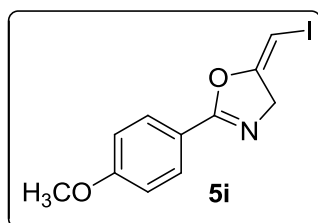

Yield: (51.66 mg, 82%)  $^1\text{H}$  NMR (400 MHz,  $\text{CDCl}_3$ )  $\delta$  7.90 (d,  $J = 8.8$  Hz, 2H), 6.94 (d,  $J = 8.8$  Hz, 2H), 5.74 (t,  $J = 3.0$  Hz, 1H), 4.60 (d,  $J = 3.0$  Hz, 2H), 3.86 (s, 3H).  $^{13}\text{C}$  NMR (100 MHz, DMSO- $d_6$ )  $\delta$  162.27, 162.18, 157.56, 129.36, 118.28, 114.33, 60.32, 55.43, 48.91. HRMS (ESI,  $m/z$ ) calcd for  $\text{C}_{11}\text{H}_{10}\text{INO}_2$   $[\text{M}+\text{H}]^+$  315.9829, found 315.9828.

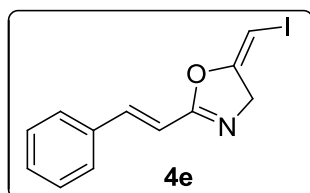

Yield: (57.85 mg, 93%)  $^1\text{H}$  NMR (400 MHz,  $\text{CDCl}_3$ )  $\delta$  7.65 (d,  $J = 1.4$  Hz, 2H), 7.37 (m, 4H), 6.77 (d,  $J = 16.4$  Hz, 1H), 5.92 (t,  $J = 3.0$  Hz, 1H), 4.49 (d,  $J = 2.7$  Hz, 2H).  $^{13}\text{C}$  NMR (100 MHz, DMSO- $d_6$ )  $\delta$  167.68, 162.39, 145.81, 139.66, 135.23, 134.11, 133.15, 119.17, 65.78, 53.88. HRMS (ESI,  $m/z$ ) calcd for  $\text{C}_{12}\text{H}_{10}\text{INO}$   $[\text{M}+\text{H}]^+$

311.9880, found 311.9888.

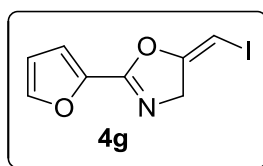

Yield: (50.6 mg, 92%)  $^1\text{H}$  NMR (400 MHz, DMSO- $d_6$ )  $\delta$  7.95 (s, 1H), 7.14 (d,  $J$  = 3.2 Hz, 1H), 6.68 (t,  $J$  = 1.6 Hz, 1H), 6.02 (t,  $J$  = 2.9 Hz, 1H), 4.55 (d,  $J$  = 2.9 Hz, 1H).  $^{13}\text{C}$  NMR (100 MHz, DMSO- $d_6$ )  $\delta$  157.21, 155.17, 147.59, 141.44, 116.16, 112.71, 60.69, 50.07. HRMS (ESI,  $m/z$ ) calcd for  $\text{C}_8\text{H}_6\text{INO}_2$   $[\text{M}+\text{H}]^+$  275.9516, found 275.9515.

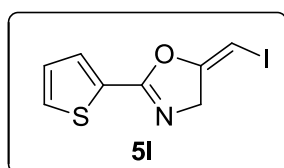

Yield: (52.38 mg, 90%)  $^1\text{H}$  NMR (400 MHz, DMSO- $d_6$ )  $\delta$  7.88 (d,  $J$  = 5.0 Hz, 1H), 7.65 (d,  $J$  = 3.6 Hz, 1H), 7.20 (t,  $J$  = 4.0 Hz, 1H), 6.04 (t,  $J$  = 2.8 Hz, 1H), 4.56 (d,  $J$  = 3.0 Hz, 2H).  $^{13}\text{C}$  NMR (100 MHz, DMSO- $d_6$ )  $\delta$  163.50, 162.38, 137.31, 136.29, 133.56, 133.46, 65.62, 54.74. HRMS (ESI,  $m/z$ ) calcd for  $\text{C}_8\text{H}_6\text{INOS}$   $[\text{M}+\text{H}]^+$  291.9288, found 291.9307

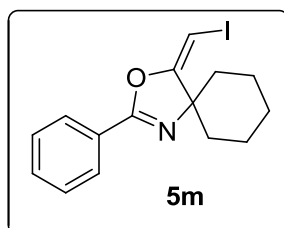

Yield: (52.25 mg, 74%)  $^1\text{H}$  NMR (400 MHz,  $\text{CDCl}_3$ )  $\delta$  8.04 (d,  $J$  = 8.0 Hz, 2H), 7.52-7.43 (m, 3H), 5.06 (s, 1H), 1.88-1.59 (m, 10H).  $^{13}\text{C}$  NMR (75 MHz, DMSO- $d_6$ )  $\delta$  167.49, 156.87, 132.15, 128.85, 127.68, 125.97, 73.48, 44.44, 24.85, 21.76. HRMS (ESI,  $m/z$ ) calcd for  $\text{C}_{15}\text{H}_{16}\text{INO}$   $[\text{M}+\text{H}]^+$  354.0349, found 354.0346.

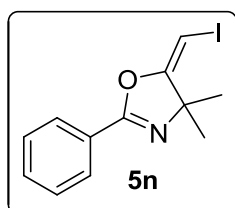

Yield: (56.34 mg, 90%)  $^1\text{H}$  NMR (400 MHz, DMSO- $d_6$ )  $\delta$  7.85-7.83 (m, 2H), 7.56-7.45 (m, 3H), 5.98 (s, 1H), 1.56 (s, 6H).  $^{13}\text{C}$  NMR (100 MHz, DMSO- $d_6$ )  $\delta$  162.79, 157.96, 132.57, 129.28, 128.11, 126.08, 71.21, 48.37, 26.09. HRMS (ESI,  $m/z$ ) calcd for  $\text{C}_{12}\text{H}_{12}\text{INO}$   $[\text{M}+\text{H}]^+$  314.0036, found 314.0029.

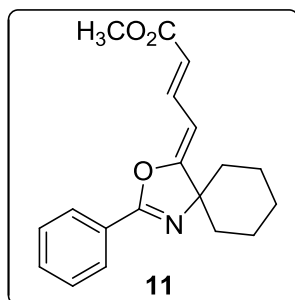

Yield: (47.27 mg, 76%)  $^1\text{H}$  NMR (400 MHz,  $\text{CDCl}_3$ )  $\delta$  8.07 (d,  $J = 7.2\text{Hz}$ , 2H), 7.81-7.75, (m, 1H), 7.53-7.45 (m, 3H), 5.83 (d,  $J = 15.4\text{ Hz}$ , 1H), 5.44 (d,  $J = 11.4\text{ Hz}$ , 1H), 3.77 (s, 3H), 1.92-1.38 (m, 10H).  $^{13}\text{C}$  NMR (100 MHz,  $\text{CDCl}_3$ )  $\delta$  169.01, 167.82, 158.52, 138.82, 131.84, 128.52, 128.33, 126.68, 116.85, 97.88, 73.64, 51.43, 38.57, 25.53, 22.06. HRMS (ESI,  $m/z$ ) calcd for  $\text{C}_{19}\text{H}_{21}\text{NO}_3$   $[\text{M}+\text{H}]^+$  312.1594, found 312.1590.

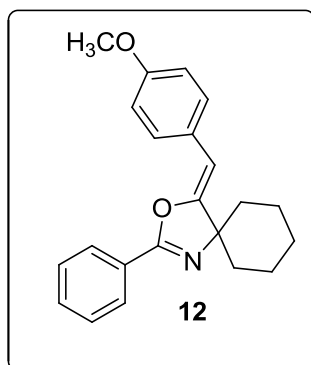

Yield: (46.62 mg, 70%)  $^1\text{H}$  NMR (400 MHz,  $\text{CDCl}_3$ )  $\delta$  8.11 (d,  $J = 6.9\text{ Hz}$ , 2H), 7.61-7.47, (m, 5H), 6.95 (d,  $J = 8.7\text{ Hz}$ , 2H), 5.47 (s, 1H), 3.84 (s, 1H), 1.97-1.41 (m, 10H).  $^{13}\text{C}$  NMR (100 MHz,  $\text{CDCl}_3$ )  $\delta$  159.79, 159.11, 157.83, 131.50, 129.11, 128.48, 128.27, 128.14, 127.49, 113.99, 98.94, 73.65, 55.31, 39.45, 25.80, 22.42. HRMS (ESI,  $m/z$ ) calcd for  $\text{C}_{22}\text{H}_{23}\text{NO}_2$   $[\text{M}+\text{H}]^+$  334.1802, found 334.1803.

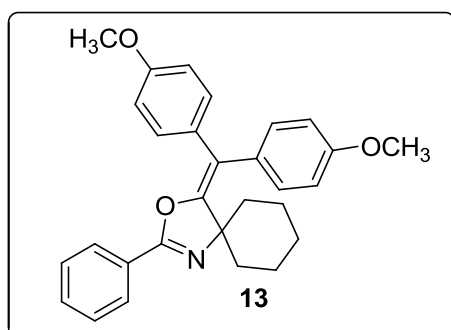

Yield: (57.18 mg, 65%)  $^1\text{H}$  NMR (400 MHz,  $\text{CDCl}_3$ )  $\delta$  8.04-8.02 (m, 2H), 7.50-7.43, (m, 5H), 7.40-7.38 (m, 2H), 7.21 (d,  $J = 8.6\text{ Hz}$ , 1H), 6.94-6.85 (m, 4H), 3.87 (s, 3H), 3.81 (s, 3H), 1.90-1.84 (m, 2H), 1.86-1.83 (m, 3H), 1.67-1.44 (s, 5H).  $^{13}\text{C}$  NMR (100 MHz,  $\text{CDCl}_3$ )  $\delta$  158.78, 158.02, 157.82, 156.76, 133.16, 132.96, 131.27, 130.00, 128.39, 128.16, 127.71, 114.84, 113.25, 113.12, 74.38, 55.24, 37.68, 29.71, 25.78, 22.39. HRMS (ESI,  $m/z$ ) calcd for  $\text{C}_{29}\text{H}_{29}\text{NO}_3$   $[\text{M}+\text{H}]^+$  440.2220, found 440.2227.

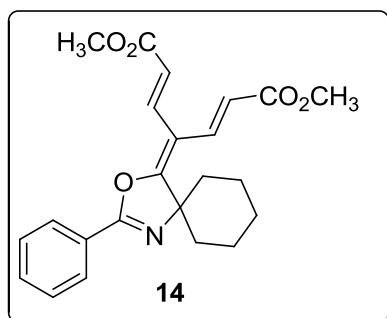

Yield: (55.44 mg, 70%)  $^1\text{H}$  NMR (400 MHz,  $\text{CDCl}_3$ )  $\delta$  8.03 (d,  $J = 7.3$  Hz, 2H), 7.90 (d,  $J = 15.8$  Hz, 1H), 7.68 (d,  $J = 16.2$  Hz, 1H), 7.54-7.46 (m, 3H), 6.34 (d,  $J = 16.2$  Hz, 1H), 6.13 (d,  $J = 15.7$  Hz, 1H), 3.82-3.81 (m, 6H), 2.13-1.96 (m, 6H), 1.92-1.73 (m, 4H),  $^{13}\text{C}$  NMR (100 MHz,  $\text{CDCl}_3$ )  $\delta$  169.91, 167.68, 167.49, 157.44, 138.37, 137.75, 132.07, 128.65, 128.31, 126.15, 121.07, 118.24, 107.74, 76.29, 51.67, 36.75, 29.69, 25.52, 22.28. HRMS (ESI,  $m/z$ ) calcd for  $\text{C}_{23}\text{H}_{25}\text{NO}_5$   $[\text{M}+\text{H}]^+$  396.1805, found 396.1807.

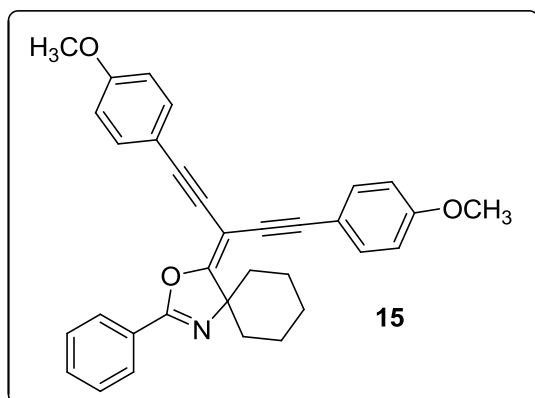

Yield: (60.51 mg, 62%)  $^1\text{H}$  NMR (400 MHz,  $\text{CDCl}_3$ )  $\delta$  8.06 (d,  $J = 7.5$  Hz, 2H), 7.53-7.46 (m, 7H), 6.91-6.89 (m, 4H), 3.84 (s, 6H), 2.62-2.56 (m, 2H), 1.95-1.87 (m, 3H), 1.73-1.37 (m, 5H).  $^{13}\text{C}$  NMR (75 MHz,  $\text{CDCl}_3$ )  $\delta$  173.52, 158.54, 156.96, 131.96, 131.36, 130.78, 127.46, 127.33, 125.53, 114.59, 114.52, 113.07, 112.92, 91.54, 91.50, 79.38, 74.95, 54.30, 54.28, 33.35, 24.86, 21.29. HRMS (ESI,  $m/z$ ) calcd for  $\text{C}_{33}\text{H}_{29}\text{NO}_3$   $[\text{M}+\text{H}]^+$  488.2220, found 488.2219.

### NMR spectra for the products

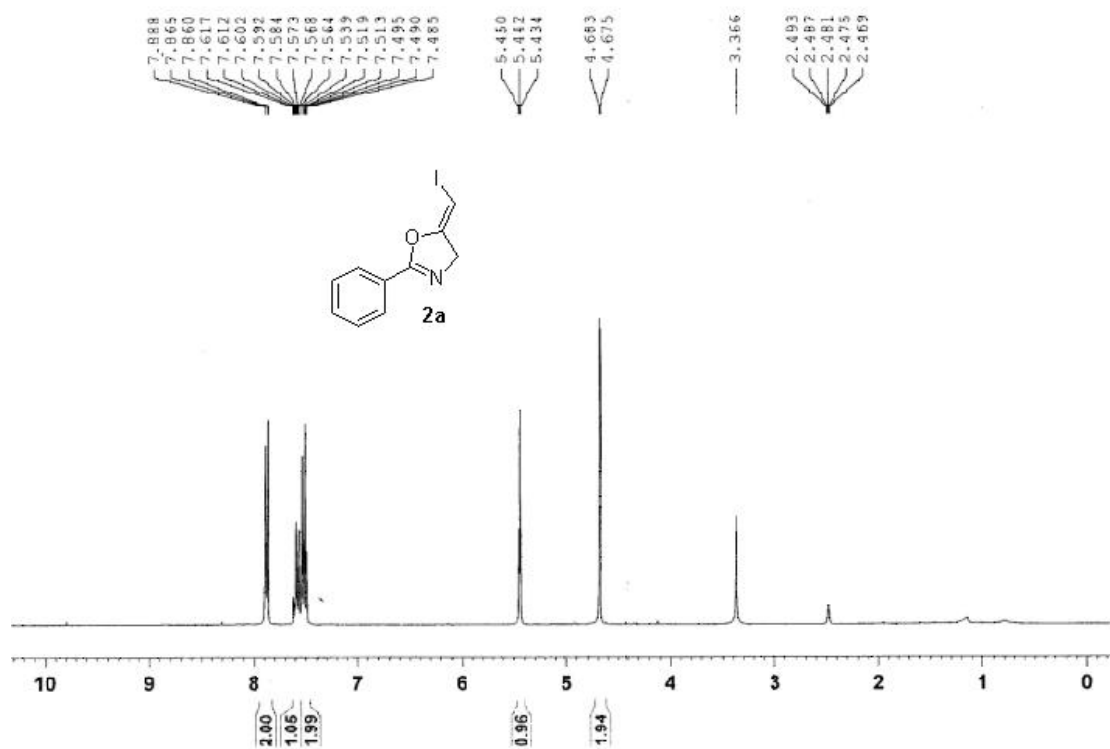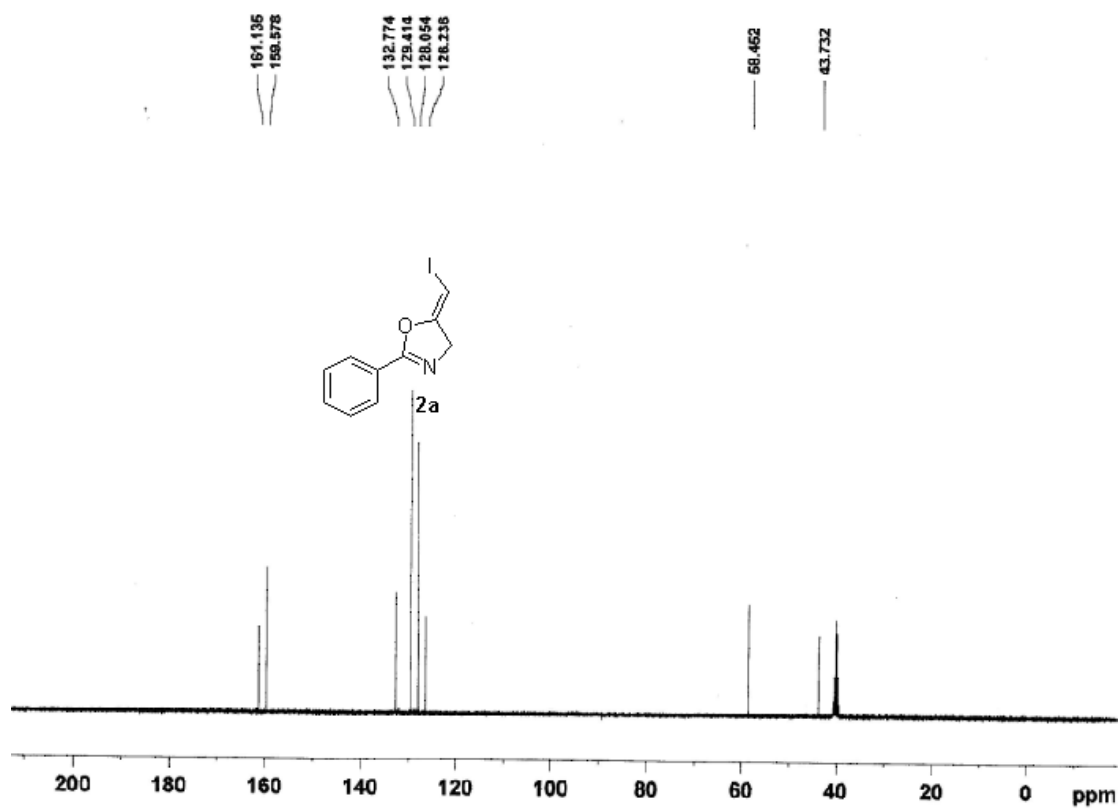

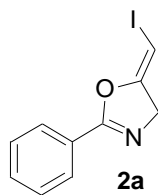

Chemical Formula:  $C_{10}H_8INO$   
 Exact Mass: 284.9651  
 Molecular Weight: 285.0811  
 $m/z$ : 353.0277 : 284.9651 (100.0%), 285.9684 (11.1%)  
 Elemental Analysis: C, 42.13; H, 2.83; I, 44.52; N, 4.91; O, 5.61

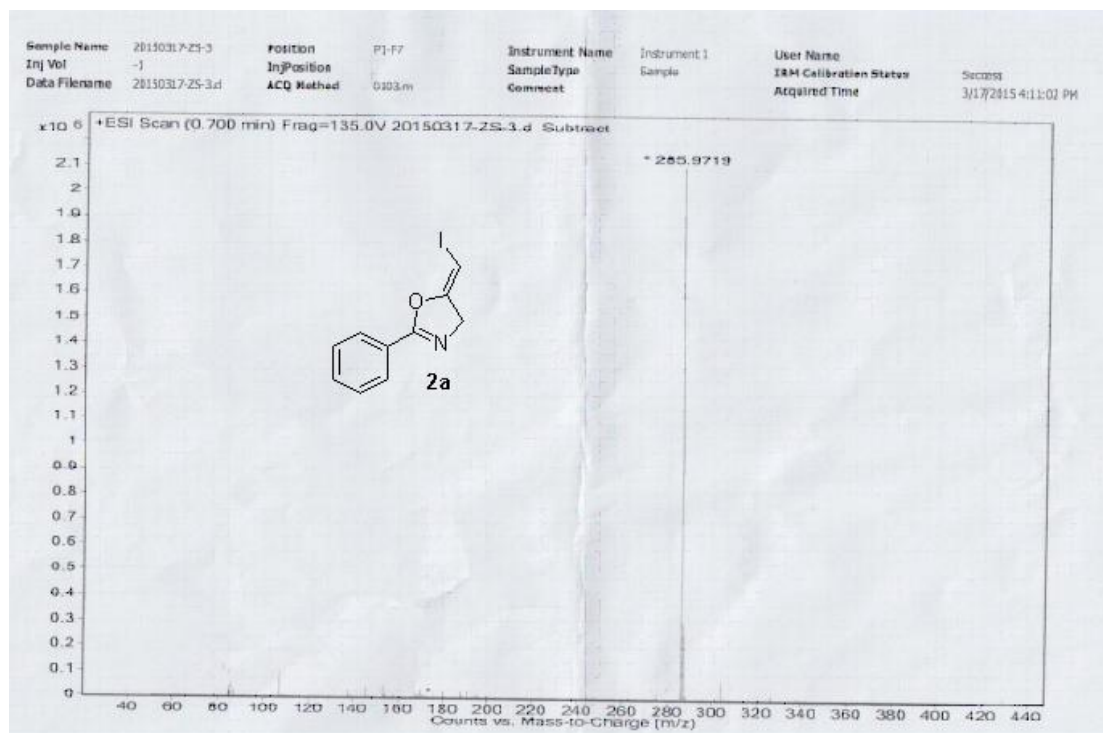

HRMS (ESI,  $m/z$ ) calcd for  $C_{10}H_8INO [M+H]^+$  **285.9723**, found **285.9719**.

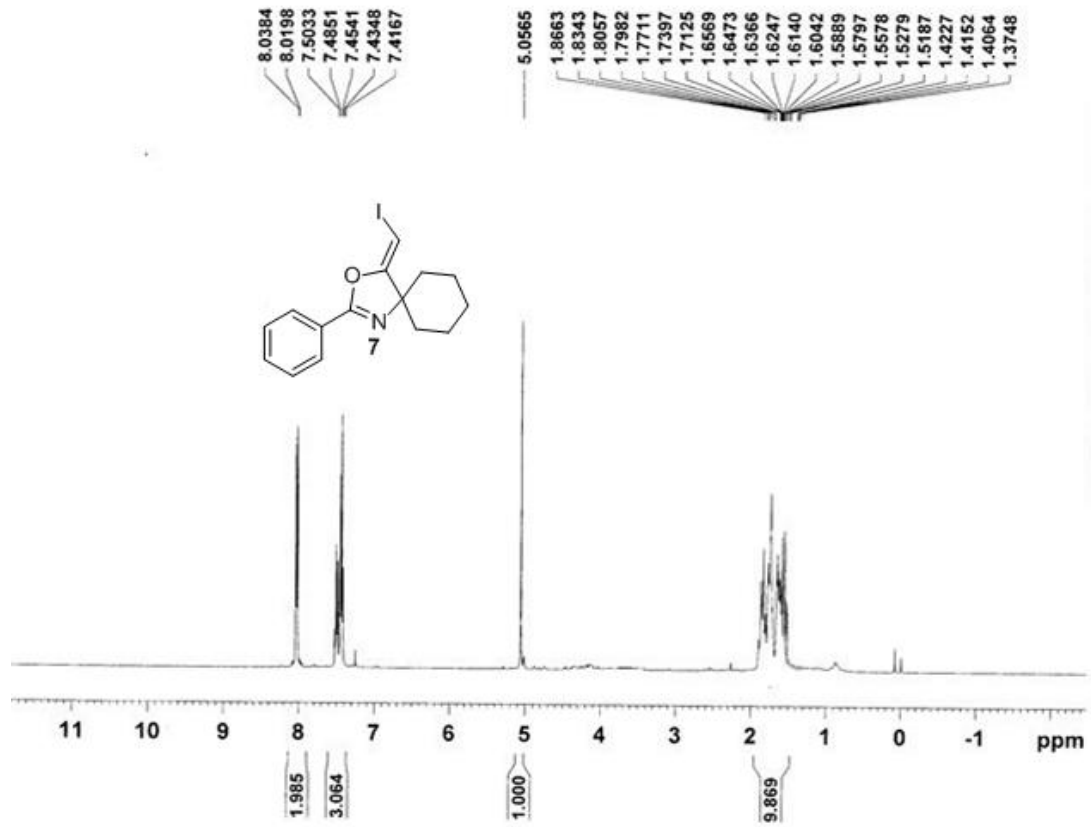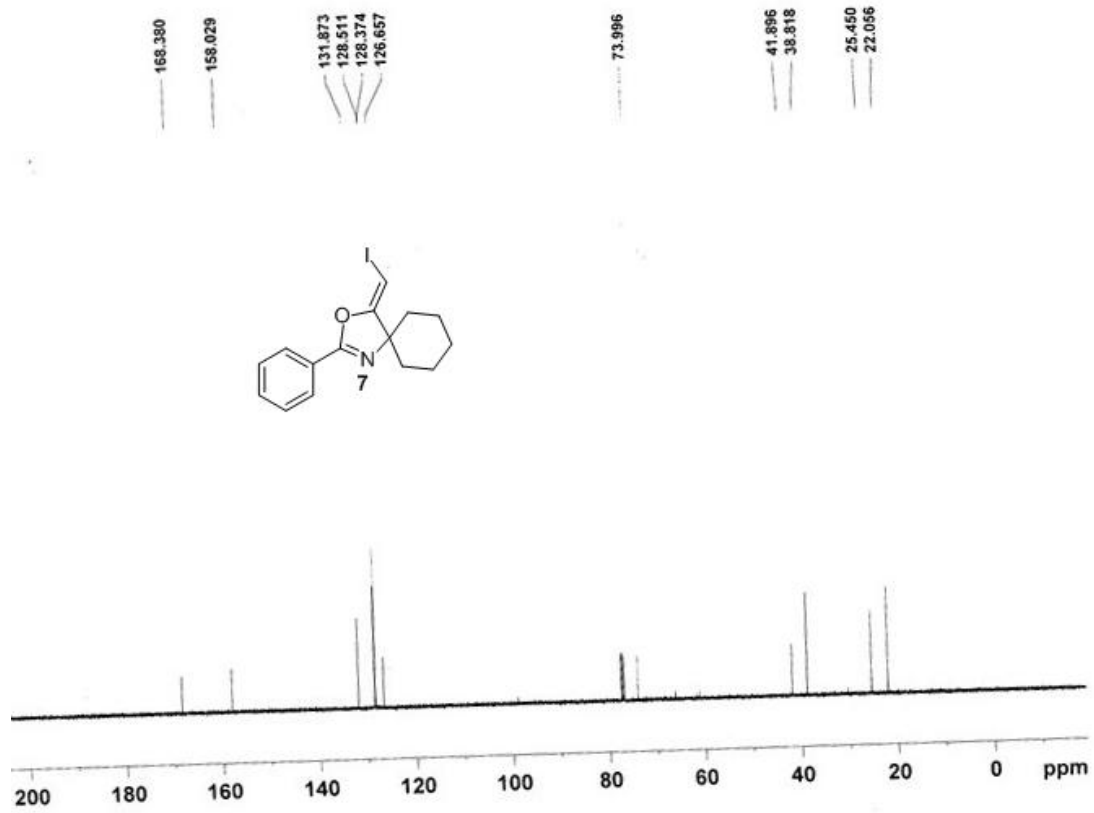

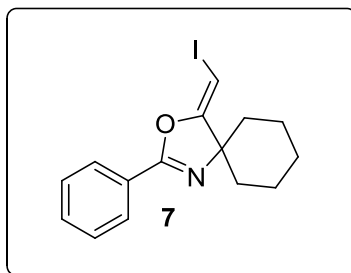

Chemical Formula:  $C_{15}H_{16}INO$

Exact Mass: 353.0277

Molecular Weight: 353.1981

m/z: 353.0277 (100.0%), 354.0310 (16.2%), 355.0344 (1.2%)

Elemental Analysis: C, 51.01; H, 4.57; I, 35.93; N, 3.97; O, 4.53

| Sample Name   | 2014-1229 | Position    | P1-C9  | Instrument Name | Instrument 1 | User Name              |                        |
|---------------|-----------|-------------|--------|-----------------|--------------|------------------------|------------------------|
| Inj Vol       | -1        | InjPosition |        | SampleType      | Sample       | IRM Calibration Status | Success                |
| Data Filename | 2014-1229 | ACQ Method  | 0103.m | Comment         |              | Acquired Time          | 12/29/2014 10:28:35 AM |

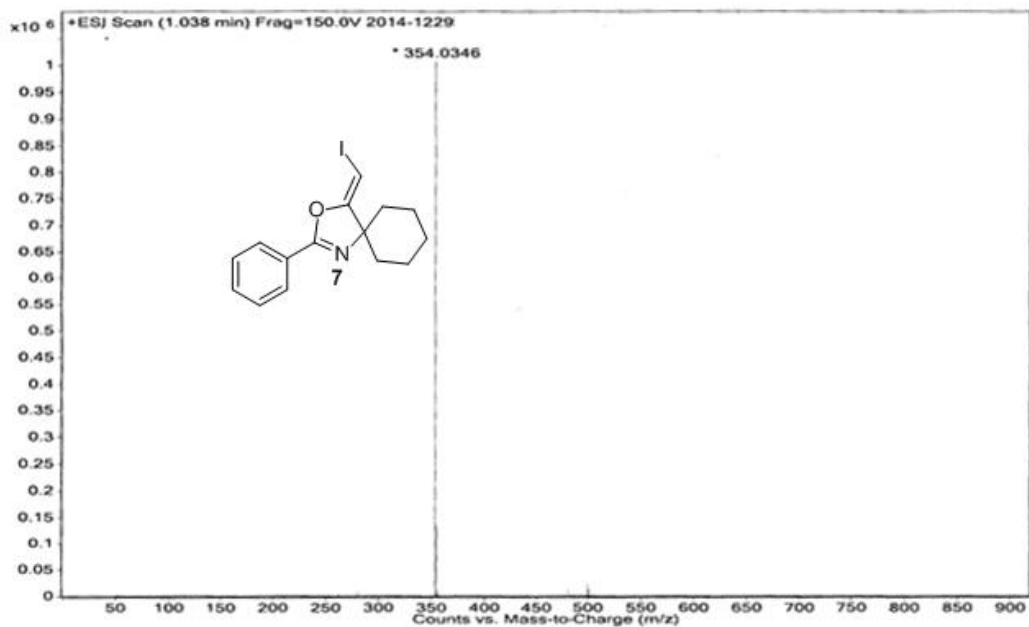

HRMS (ESI, m/z) calcd for  $C_{15}H_{16}INO [M+H]^+$  **354.0349**, found **354.0346**.



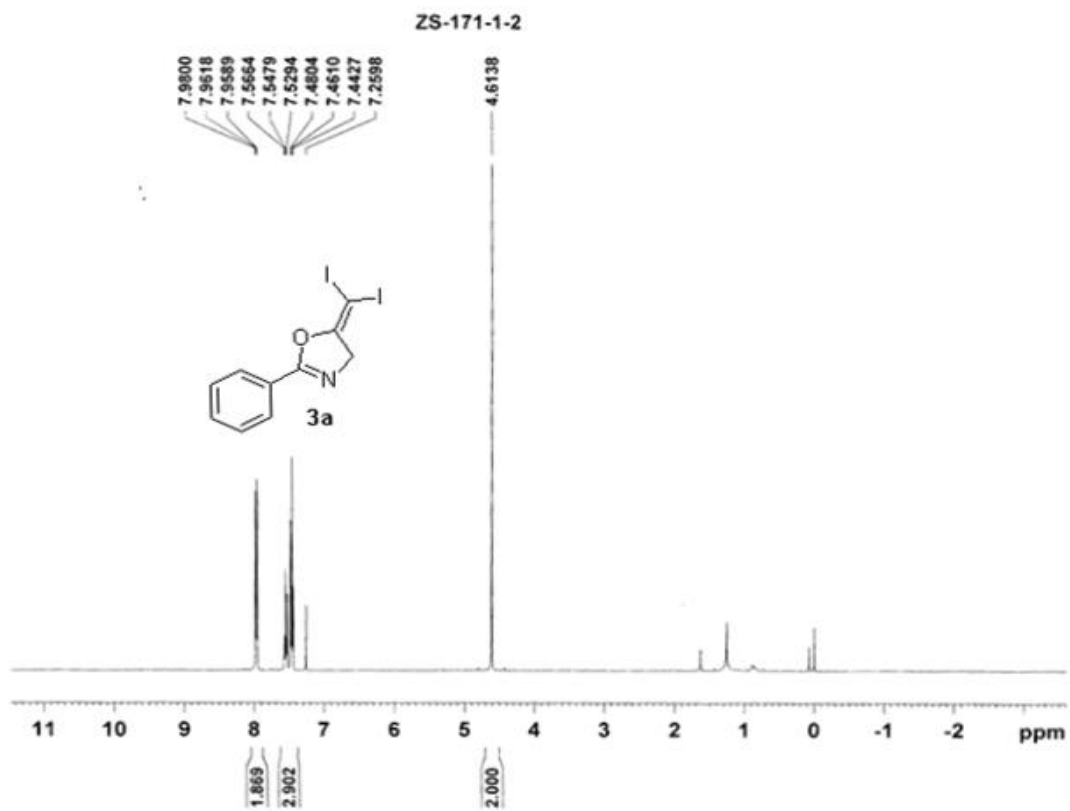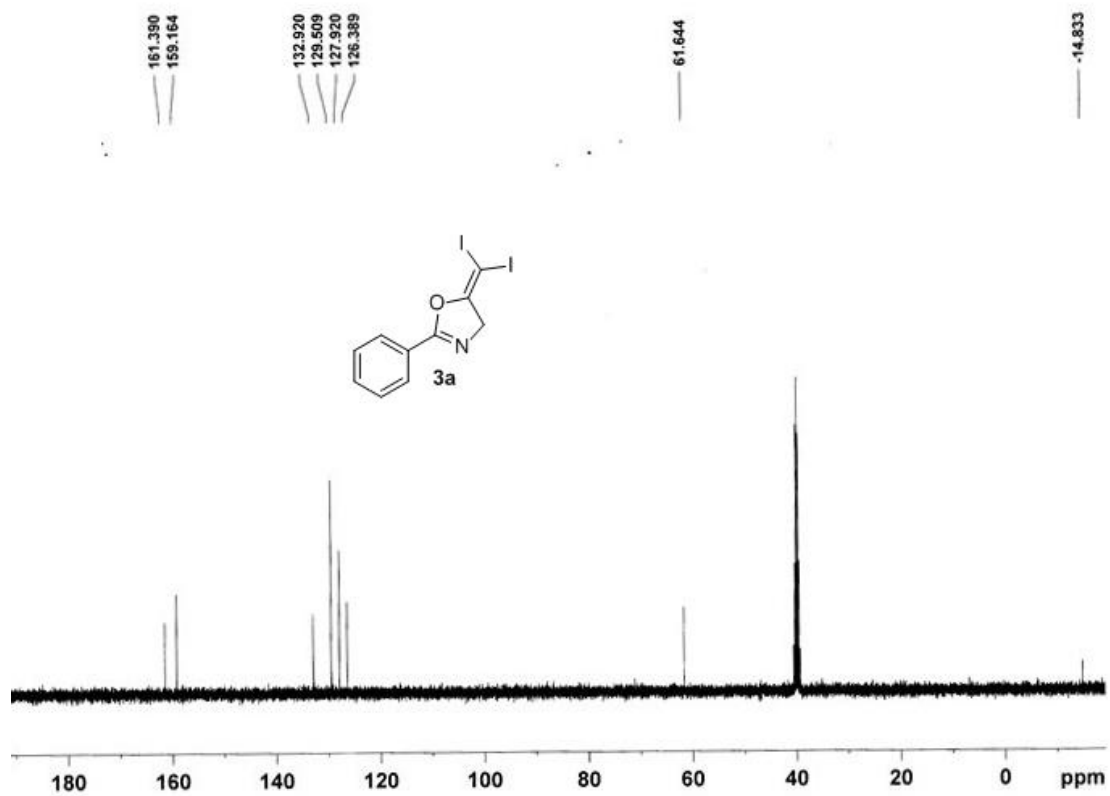

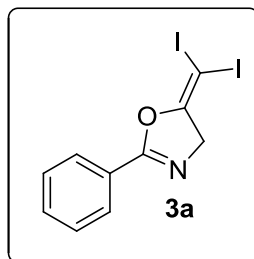

Chemical Formula: C<sub>10</sub>H<sub>7</sub>I<sub>2</sub>NO

Exact Mass: 410.86

Molecular Weight: 410.98

m/z: 410.86 (100.0%), 411.87 (10.9%)

Elemental Analysis: C, 29.22; H, 1.72; I, 61.76; N, 3.41; O, 3.89

| Sample Name   | 2014-1215-ZS-124-1   | Position    | P1-F2  | Instrument Name | Instrument 1 | User Name              |                        |
|---------------|----------------------|-------------|--------|-----------------|--------------|------------------------|------------------------|
| Inj Vol       | -1                   | InjPosition |        | SampleType      | Sample       | IRM Calibration Status | Success                |
| Data Filename | 2014-1215-ZS-124-1.d | ACQ Method  | 0103.m | Comment         |              | Acquired Time          | 12/15/2014 11:03:37 AM |

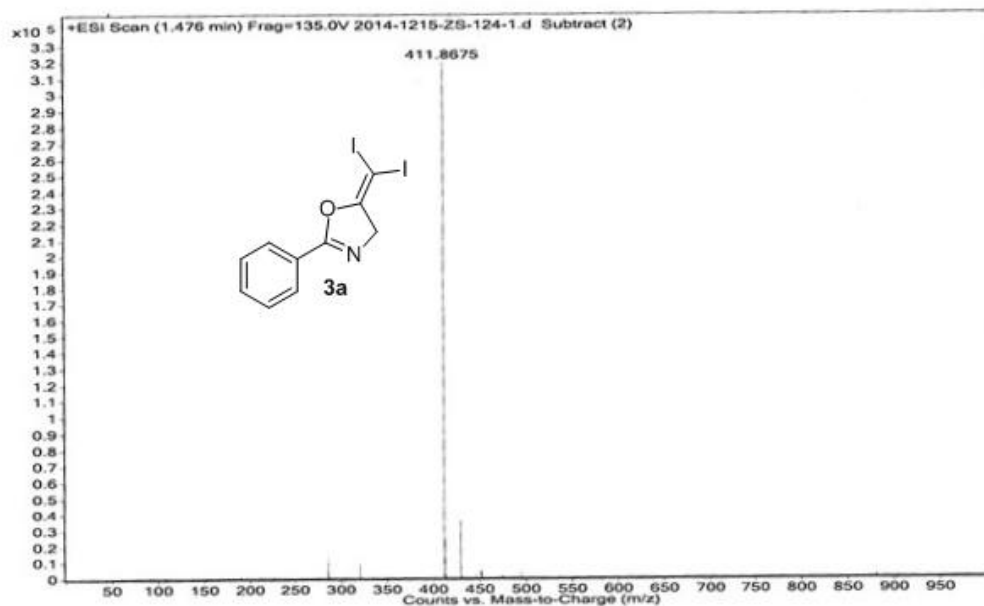

HRMS (ESI, m/z) calcd for C<sub>10</sub>H<sub>7</sub>I<sub>2</sub>NO [M+H]<sup>+</sup> **411.8690**, found **411.8675**.

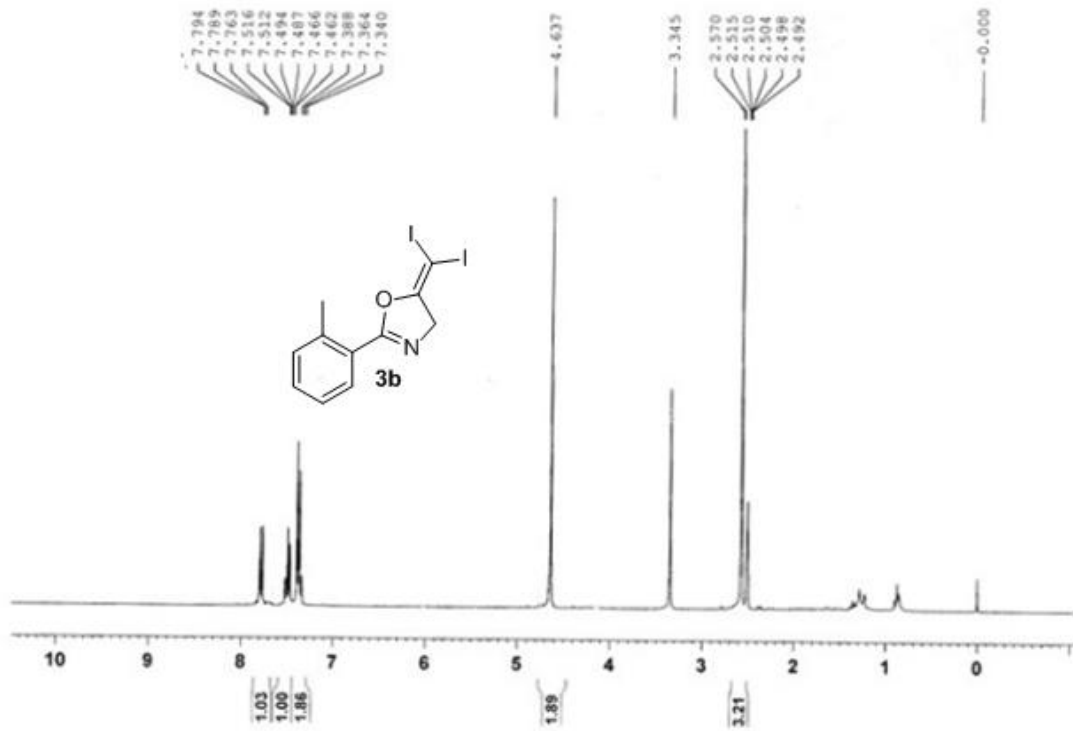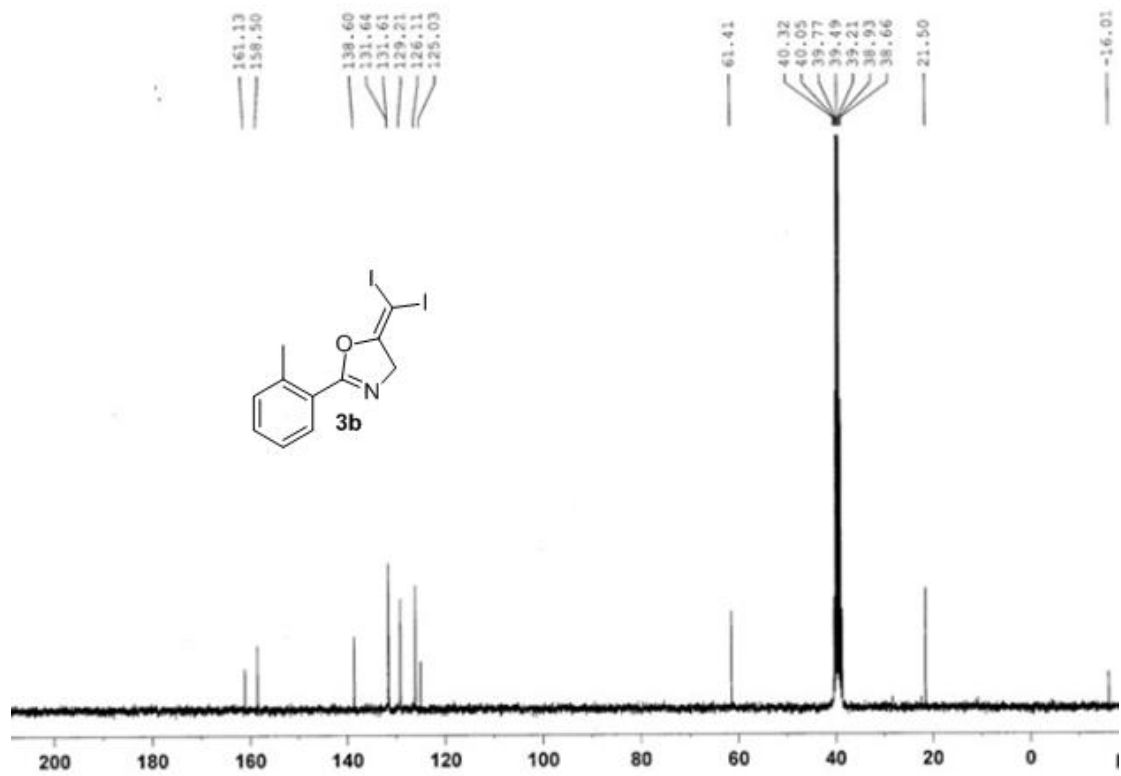

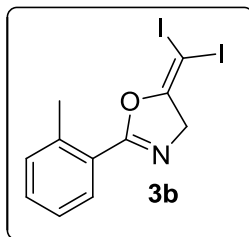

Chemical Formula:  $C_{11}H_9I_2NO$

Exact Mass: 424.88

Molecular Weight: 425.00

m/z: 424.88 (100.0%), 425.88 (12.0%)

Elemental Analysis: C, 31.09; H, 2.13; I, 59.72; N, 3.30; O, 3.76

| Sample Name  | Position    | Instrument Name | Instrument 1 | User Name              |
|--------------|-------------|-----------------|--------------|------------------------|
| 2014-1127    | P1-A2       | Instrument 1    | Sample       |                        |
| vj Val       | InjPosition | SampleType      |              | IRM Calibration Status |
| 2014-1127    | 0103.m      | Comment         |              | Success                |
| ata Filename | ACQ Method  |                 |              | Acquired Time          |
|              |             |                 |              | 11/27/2014 9:34:06 #   |

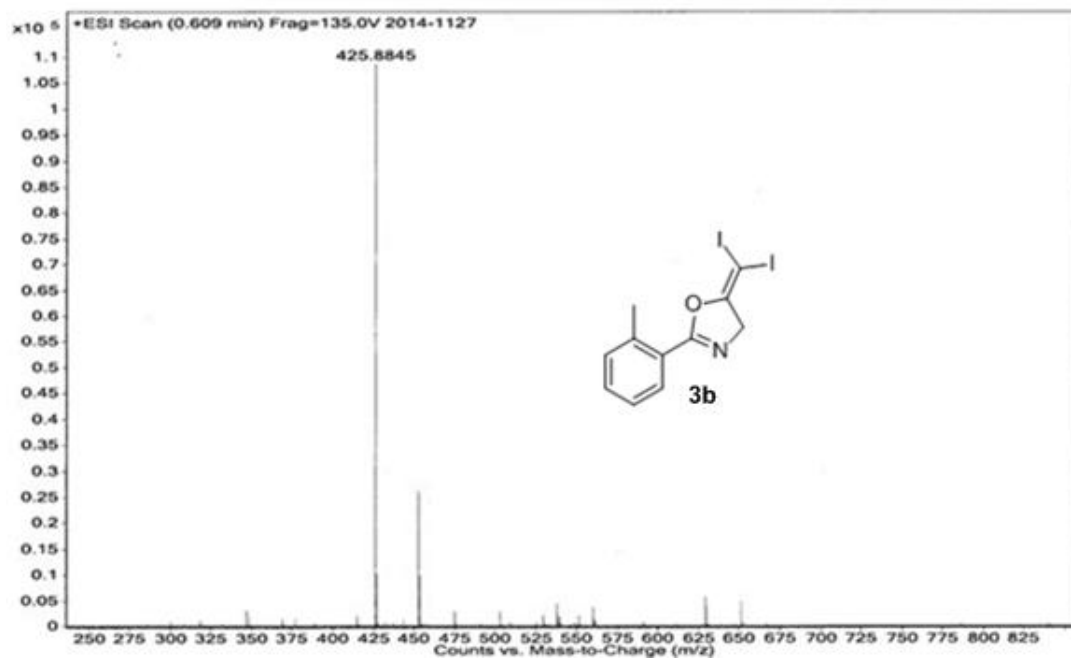

HRMS (ESI, m/z) calcd for  $C_{11}H_9I_2NO [M+H]^+$  **425.8846**, found **425.8845**.

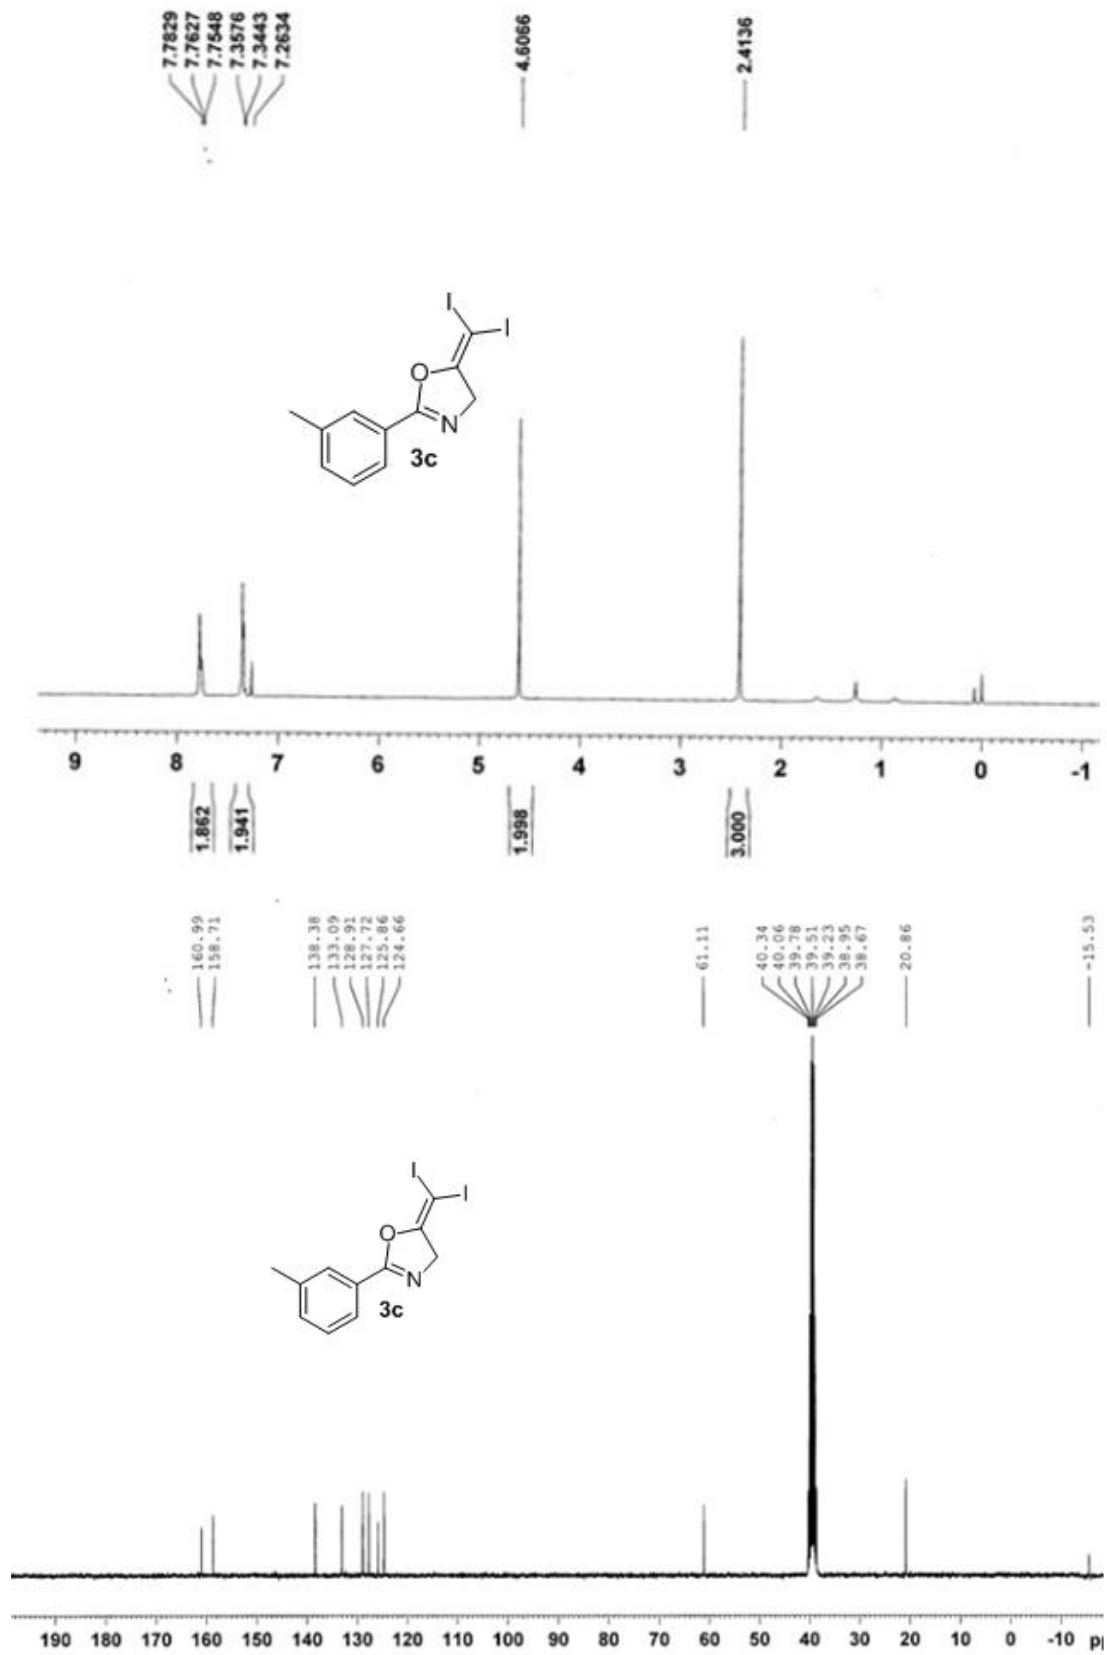

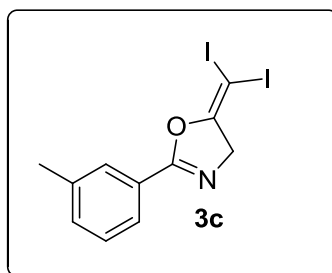

Chemical Formula: C<sub>11</sub>H<sub>9</sub>I<sub>2</sub>NO

Exact Mass: 424.88

Molecular Weight: 425.00

m/z: 424.88 (100.0%), 425.88 (12.0%)

Elemental Analysis: C, 31.09; H, 2.13; I, 59.72; N, 3.30; O, 3.76

| Sample Name   | 2014-1127-zs-1   | Position    | F1-A2  | Instrument Name | Instrument 1 | User Name              |                   |
|---------------|------------------|-------------|--------|-----------------|--------------|------------------------|-------------------|
| inj Vol       | -1               | InjPosition |        | SampleType      | Sample       | IRM Calibration Status | Success           |
| Meta Filename | 2014-1127-zs-1.d | ACQ Method  | 0003.m | Comment         |              | Acquired Time          | 11/27/2014 9:34:1 |

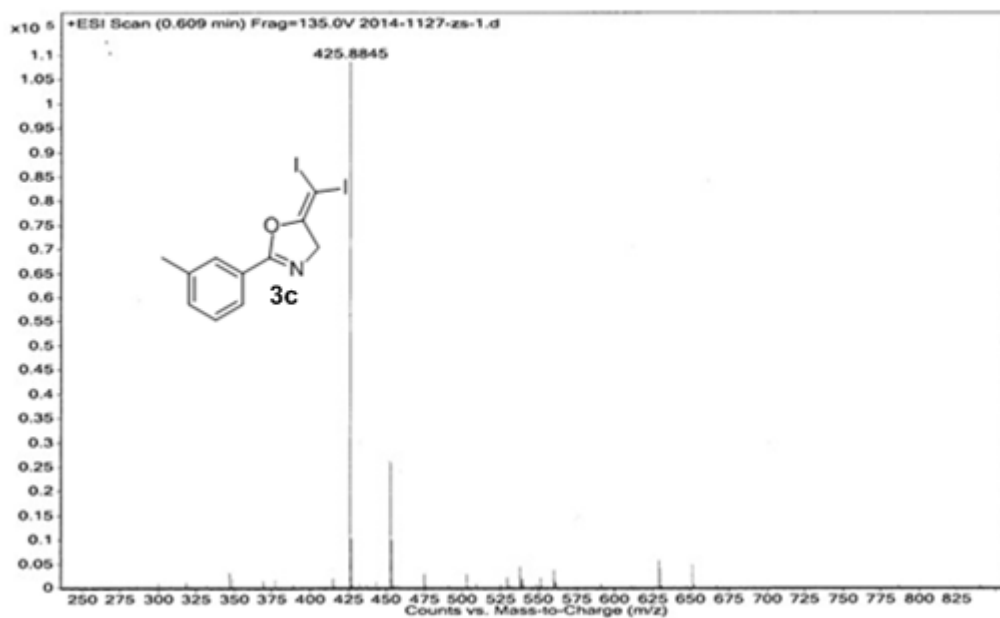

HRMS (ESI, m/z) calcd for C<sub>11</sub>H<sub>9</sub>I<sub>2</sub>NO [M+H]<sup>+</sup> **425.8846**, found **425.8845**.

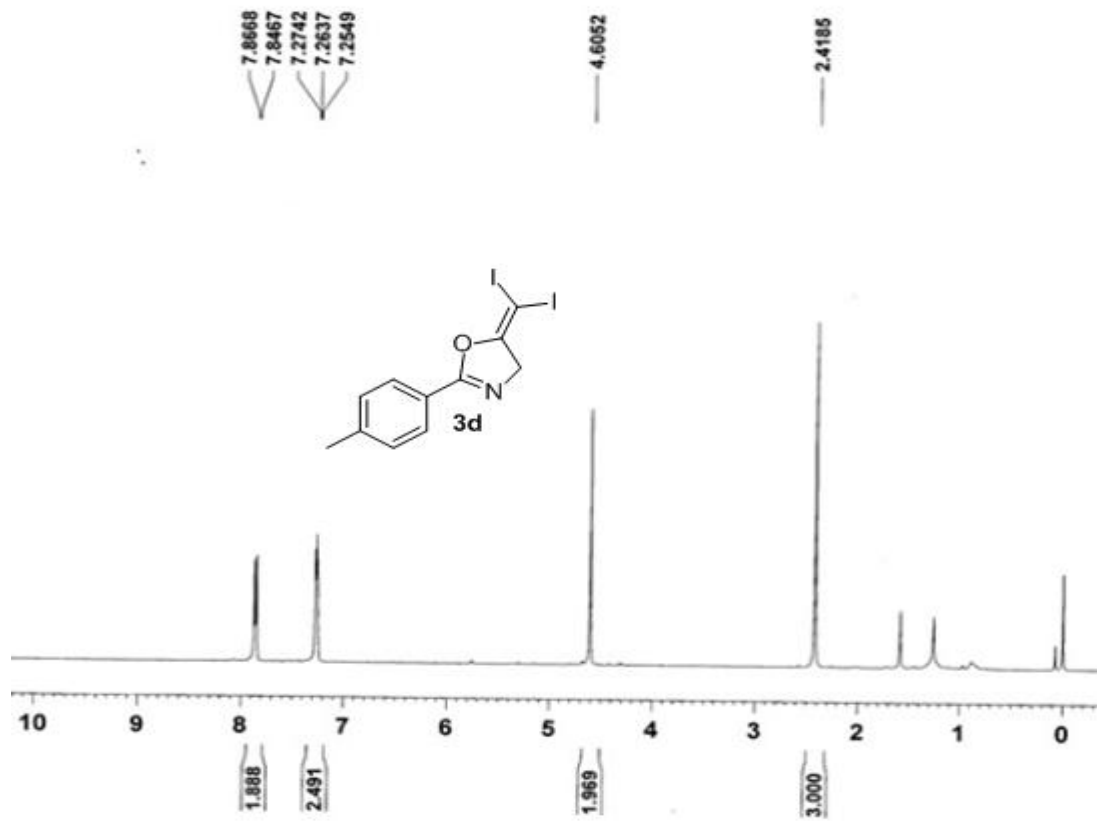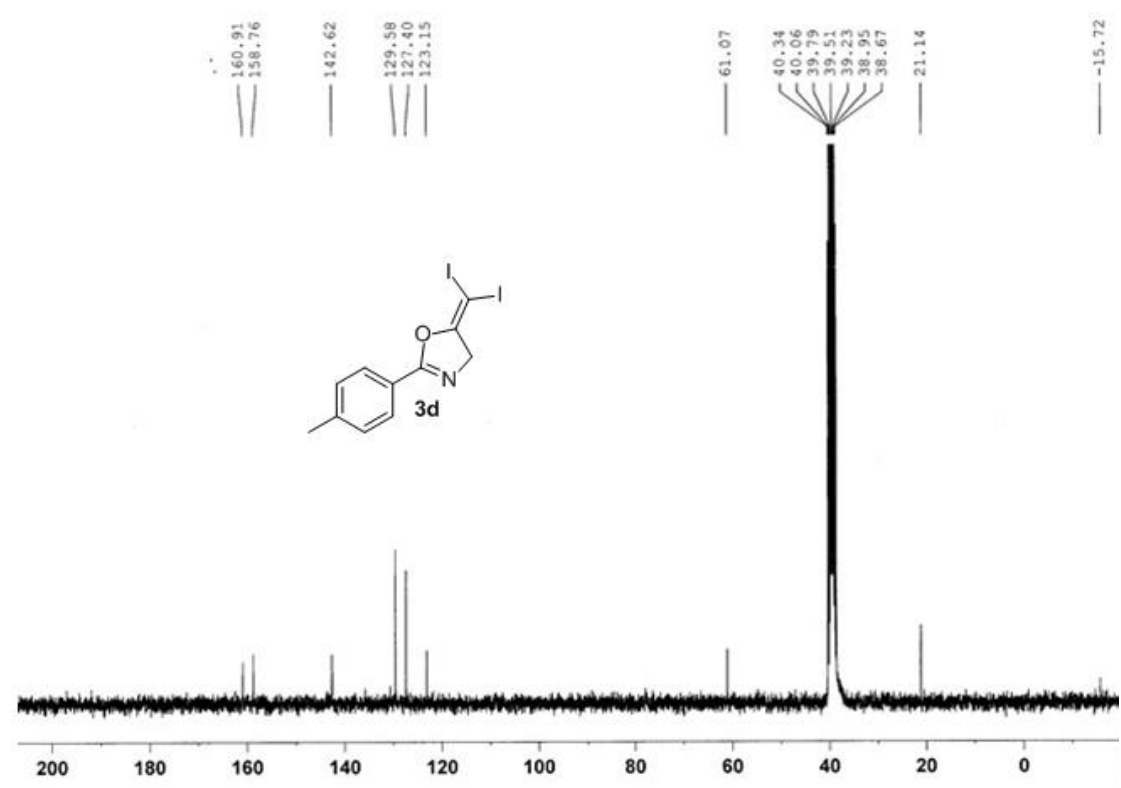

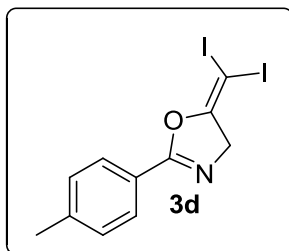

Chemical Formula: C<sub>11</sub>H<sub>9</sub>I<sub>2</sub>NO

Exact Mass: 424.88

Molecular Weight: 425.00

m/z: 424.88 (100.0%), 425.88 (12.0%)

Elemental Analysis: C, 31.09; H, 2.13; I, 59.72; N, 3.30; O, 3.76

| Sample Name      | Position    | Instrument Name | User Name              |
|------------------|-------------|-----------------|------------------------|
| 2014-1127-zs-2   | P1-B2       | Instrument 1    |                        |
| Inj Vol          | InjPosition | SampleType      | IRM Calibration Status |
| -1               |             | Sample          | Success                |
| Data Filename    | ACQ Method  | Comment         | Acquired Time          |
| 2014-1127-zs-2.d | 0103.m      |                 | 11/27/2014 9:36:23 AM  |

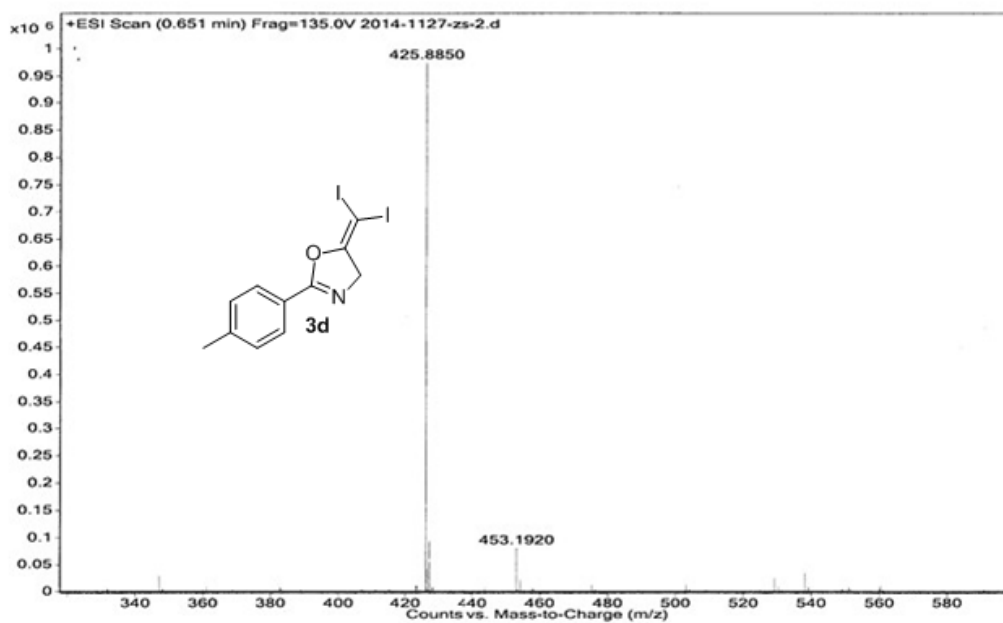

HRMS (ESI, m/z) calcd for C<sub>11</sub>H<sub>9</sub>I<sub>2</sub>NO [M+H]<sup>+</sup> **425.8846**, found **425.8850**.



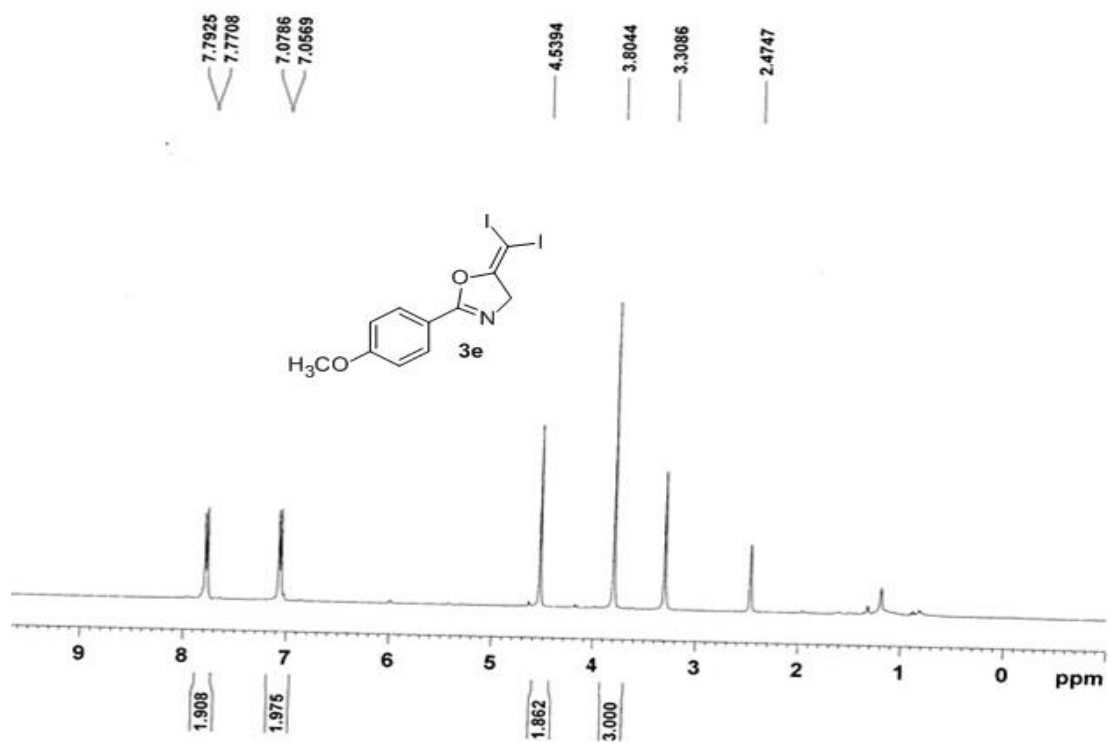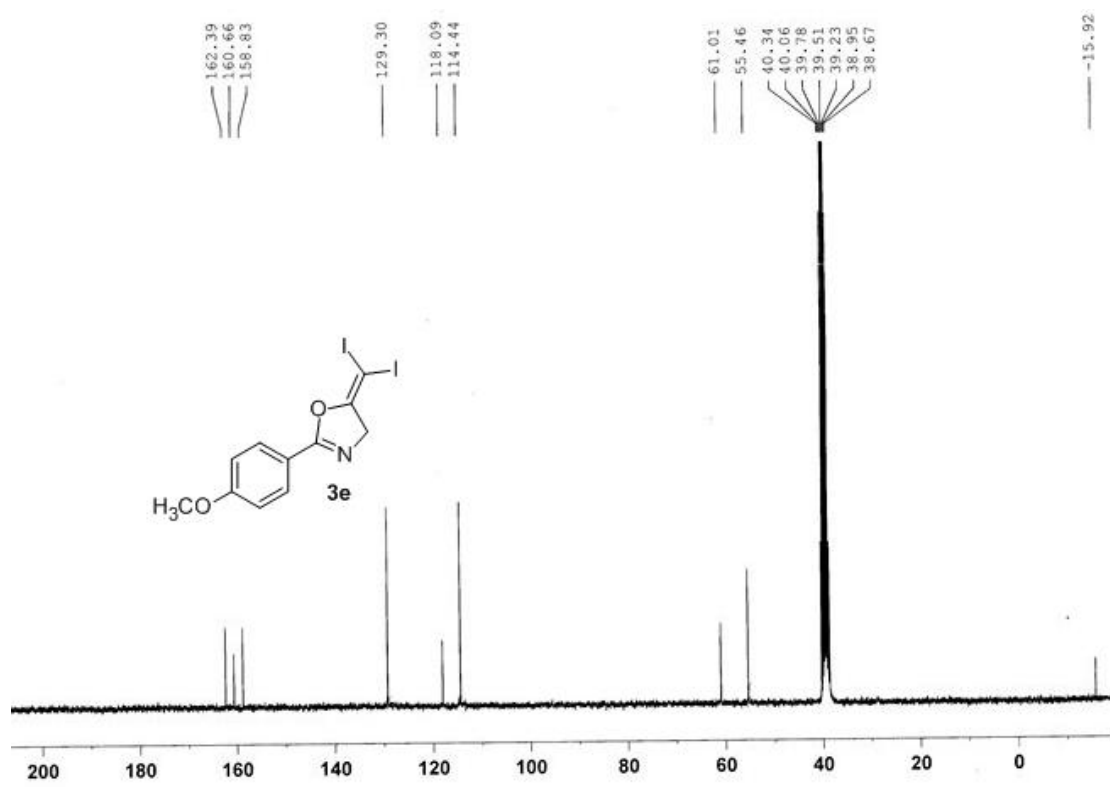

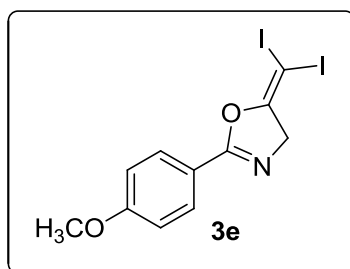

Chemical Formula:  $C_{11}H_9I_2NO_2$

Exact Mass: 440.87

Molecular Weight: 441.00

m/z: 440.87 (100.0%), 441.88 (12.1%), 442.88 (1.1%)

Elemental Analysis: C, 29.96; H, 2.06; I, 57.55; N, 3.18; O, 7.26

| Sample Name   | 2014-1229-ZS-150-1   | Position    | P1-D9  | Instrument Name | Instrument 1 | User Name              |                        |
|---------------|----------------------|-------------|--------|-----------------|--------------|------------------------|------------------------|
| Inj Vol       | -1                   | InjPosition |        | SampleType      | Sample       | IRM Calibration Status | Success                |
| Data Filename | 2014-1229-ZS-150-1.d | ACQ Method  | 0103.m | Comment         |              | Acquired Time          | 12/29/2014 10:24:08 AM |

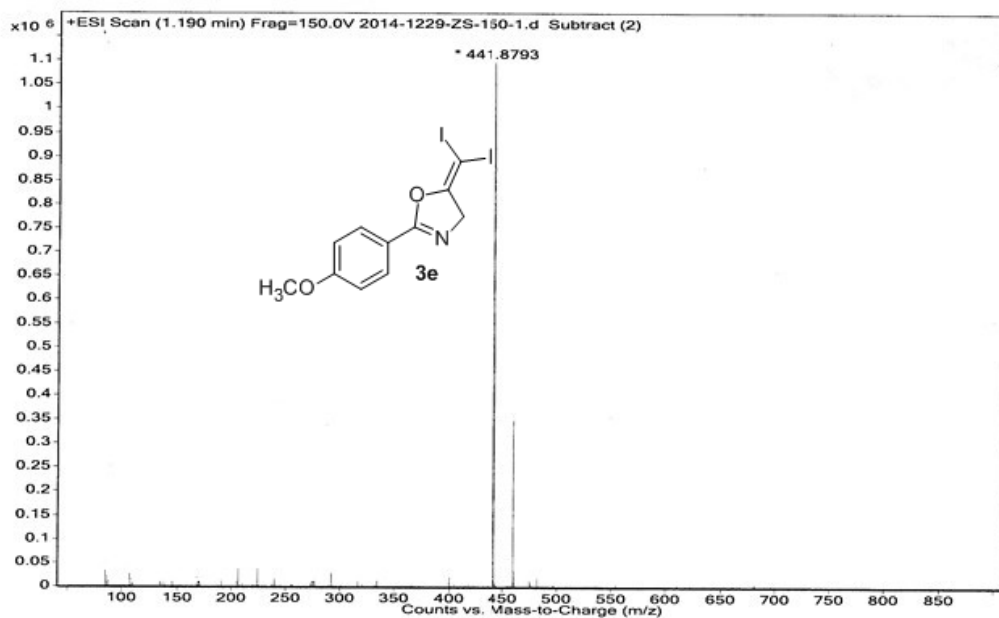

HRMS (ESI, m/z) calcd for  $C_{11}H_9I_2NO_2$   $[M+H]^+$  **441.8795**, found **441.8793**.

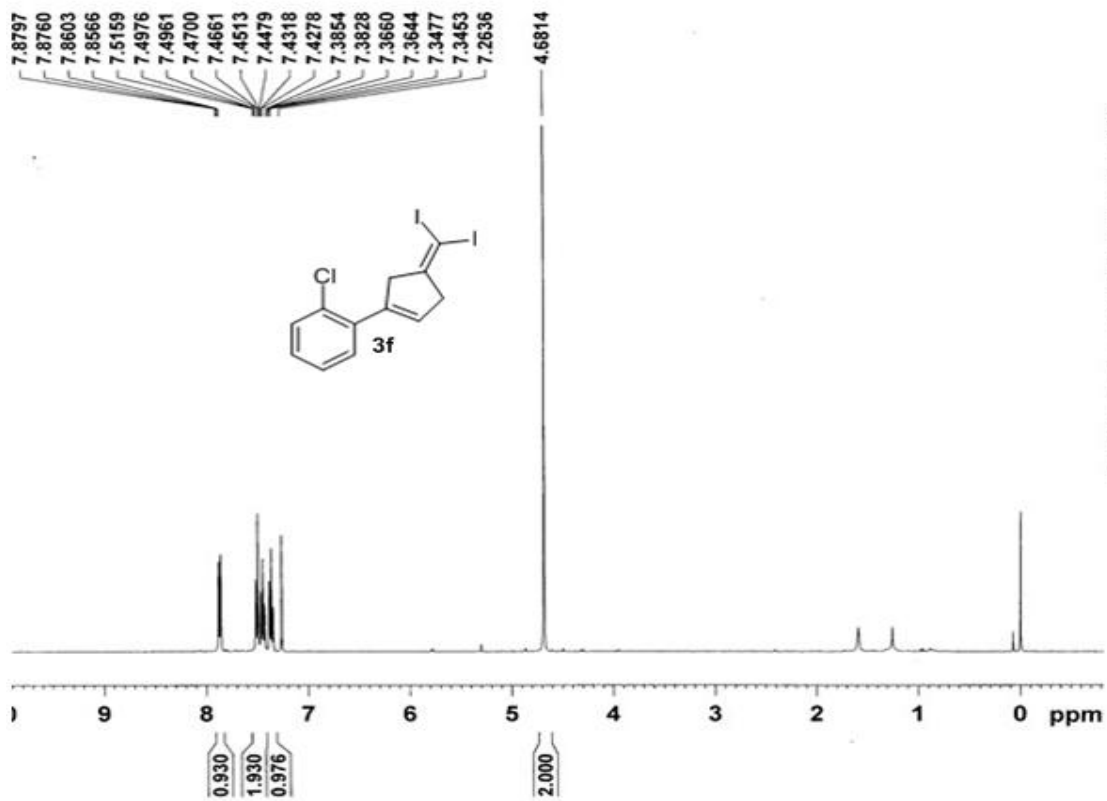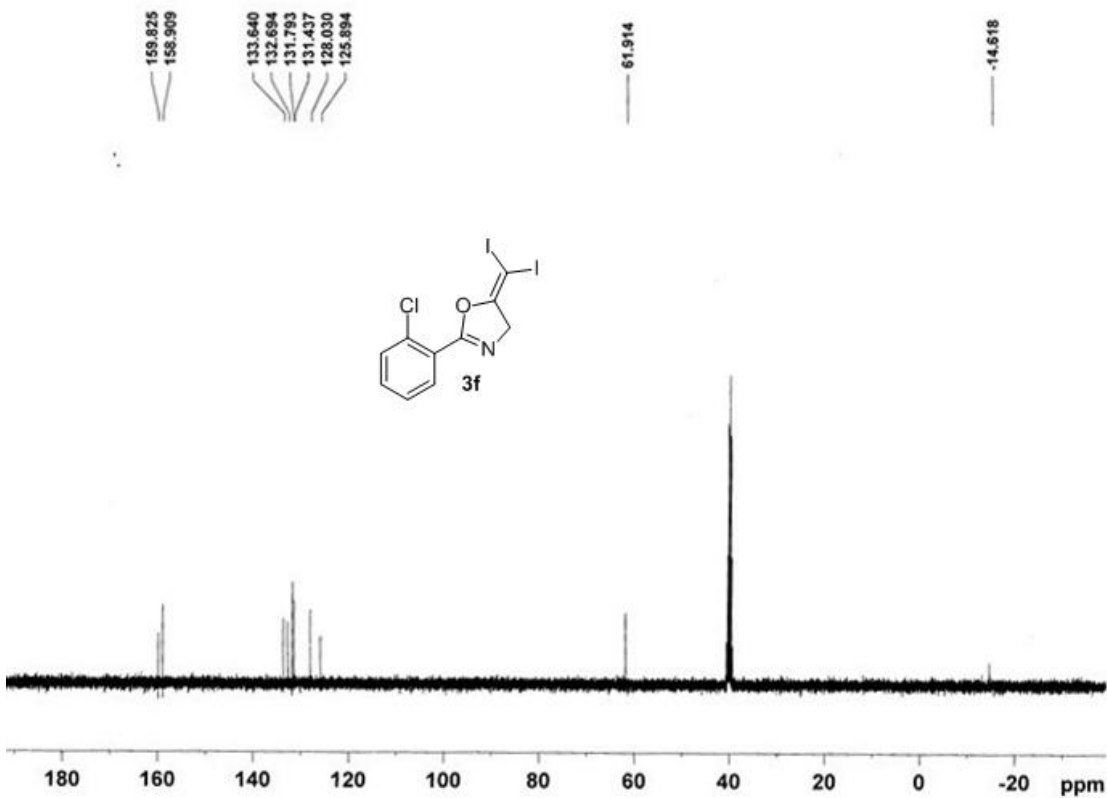

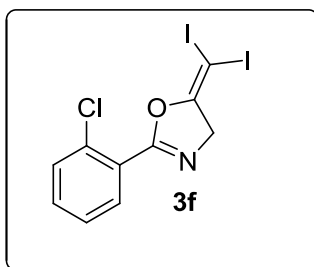

Chemical Formula: C<sub>10</sub>H<sub>6</sub>ClI<sub>2</sub>NO

Exact Mass: 444.82

Molecular Weight: 445.42

m/z: 444.82 (100.0%), 446.82 (32.0%), 445.83 (10.9%),  
447.82 (3.6%)

Elemental Analysis: C, 26.96; H, 1.36; Cl, 7.96; I, 56.98;  
N, 3.14; O, 3.59

| Sample Name      | Position    | Instrument Name | User Name              |
|------------------|-------------|-----------------|------------------------|
| 2014-1127-zs-3   | P1-C2       | Instrument 1    |                        |
| Inj Vol          | InjPosition | SampleType      | IRM Calibration Status |
| -1               |             | Sample          | Success                |
| Data Filename    | ACQ Method  | Comment         | Acquired Time          |
| 2014-1127-zs-3.d | 0103.m      |                 | 11/27/2014 9:38:39 AM  |

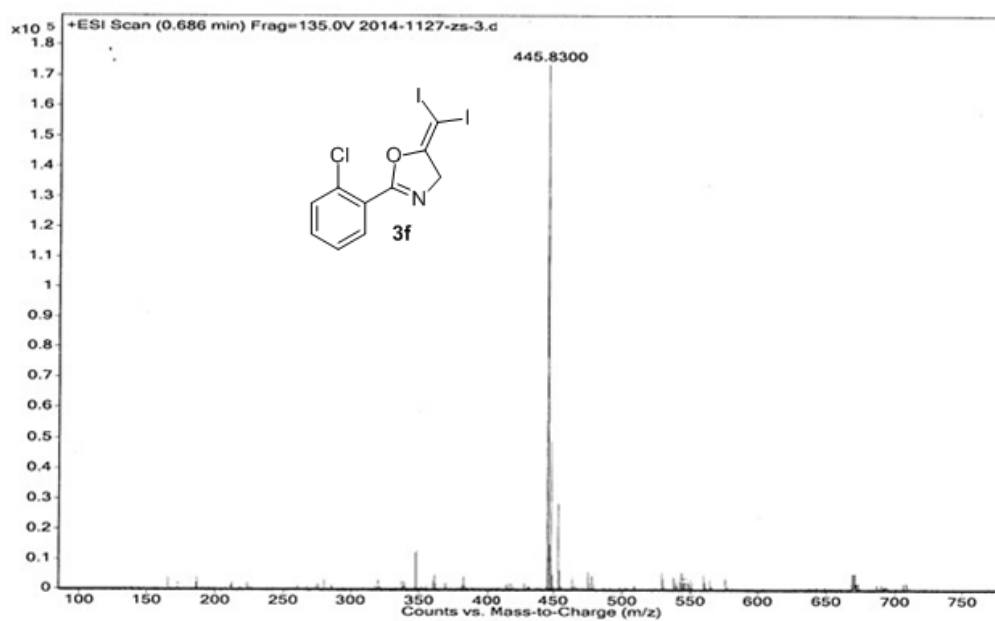

HRMS (ESI, m/z) calcd for C<sub>10</sub>H<sub>6</sub>ClI<sub>2</sub>NO [M+H]<sup>+</sup> **445.8300**, found **445.8300**.

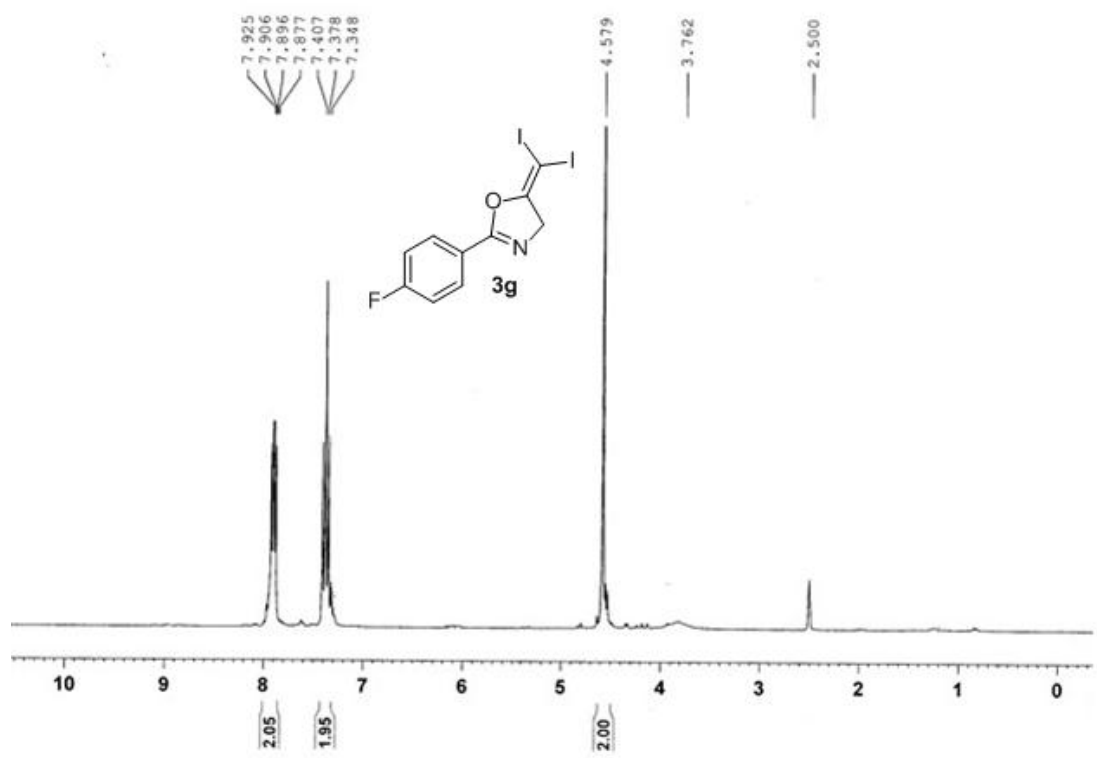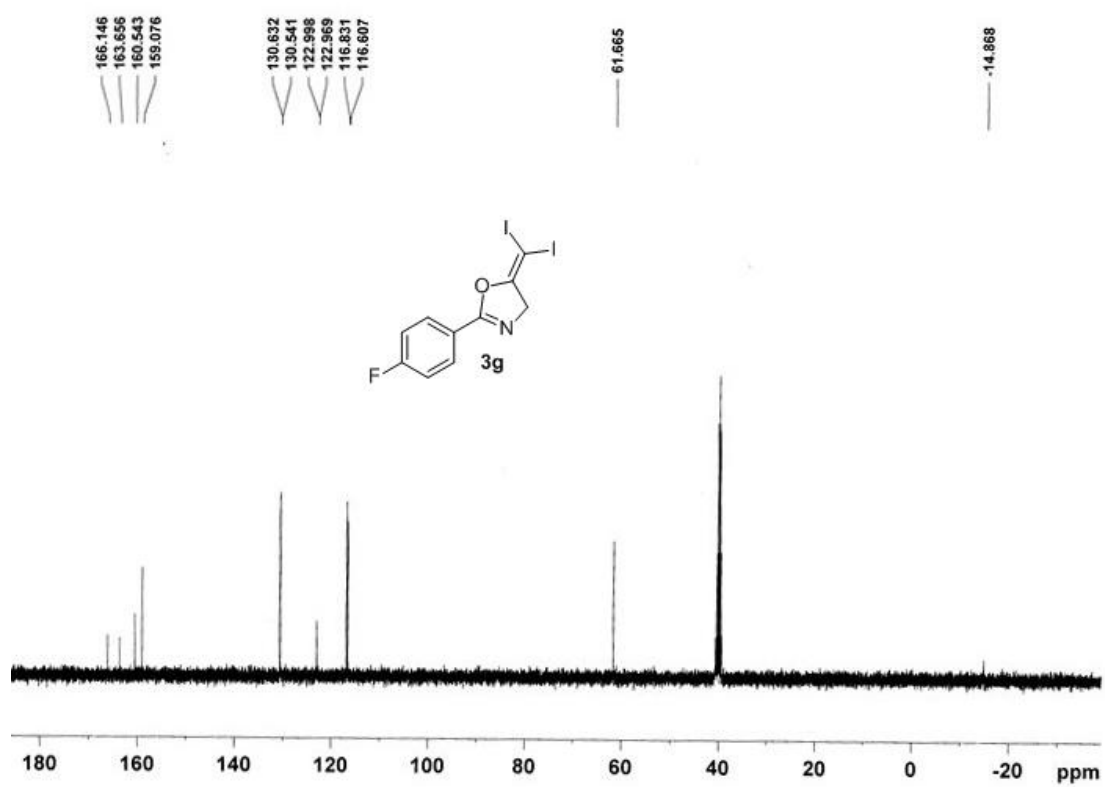

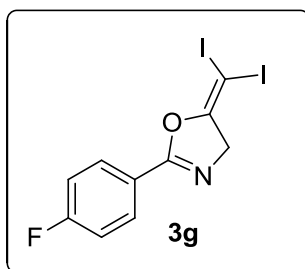

Chemical Formula: C<sub>10</sub>H<sub>6</sub>FI<sub>2</sub>NO

Exact Mass: 428.85

Molecular Weight: 428.97

m/z: 428.85 (100.0%), 429.86 (10.9%)

Elemental Analysis: C, 28.00; H, 1.41; F, 4.43; I, 59.17; N, 3.27; O, 3.73

| Sample Name   | 2014-1215-ZS-125-3   | Position    | P1-C2  | Instrument Name | Instrument 1 | User Name              |                        |
|---------------|----------------------|-------------|--------|-----------------|--------------|------------------------|------------------------|
| Inj Vol       | -1                   | InjPosition |        | SampleType      | Sample       | IRM Calibration Status | Success                |
| Data Filename | 2014-1215-ZS-125-3.d | ACQ Method  | 0103.m | Comment         |              | Acquired Time          | 12/15/2014 11:12:44 AM |

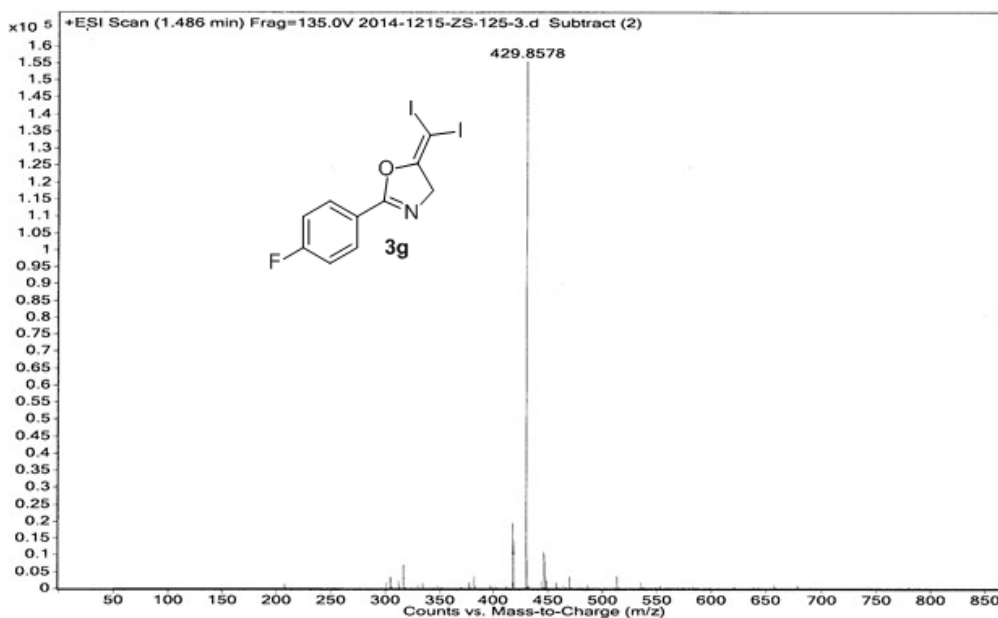

HRMS (ESI, m/z) calcd for C<sub>10</sub>H<sub>6</sub>FI<sub>2</sub>NO [M+H]<sup>+</sup> **429.8596**, found **429.8578**.

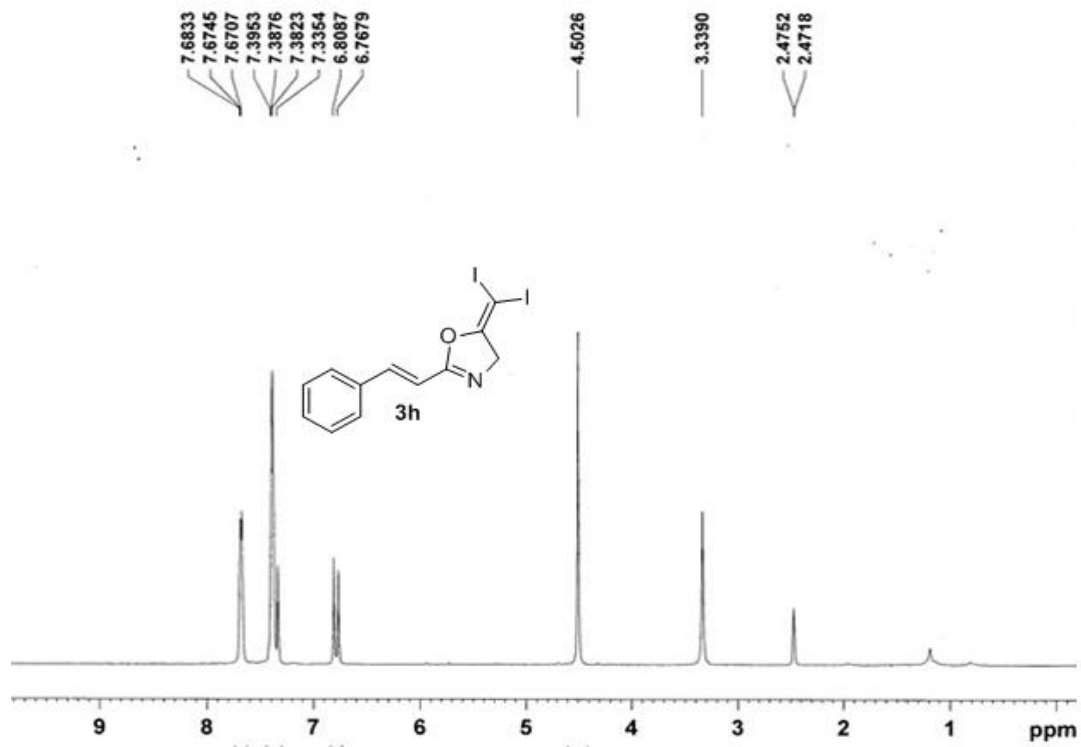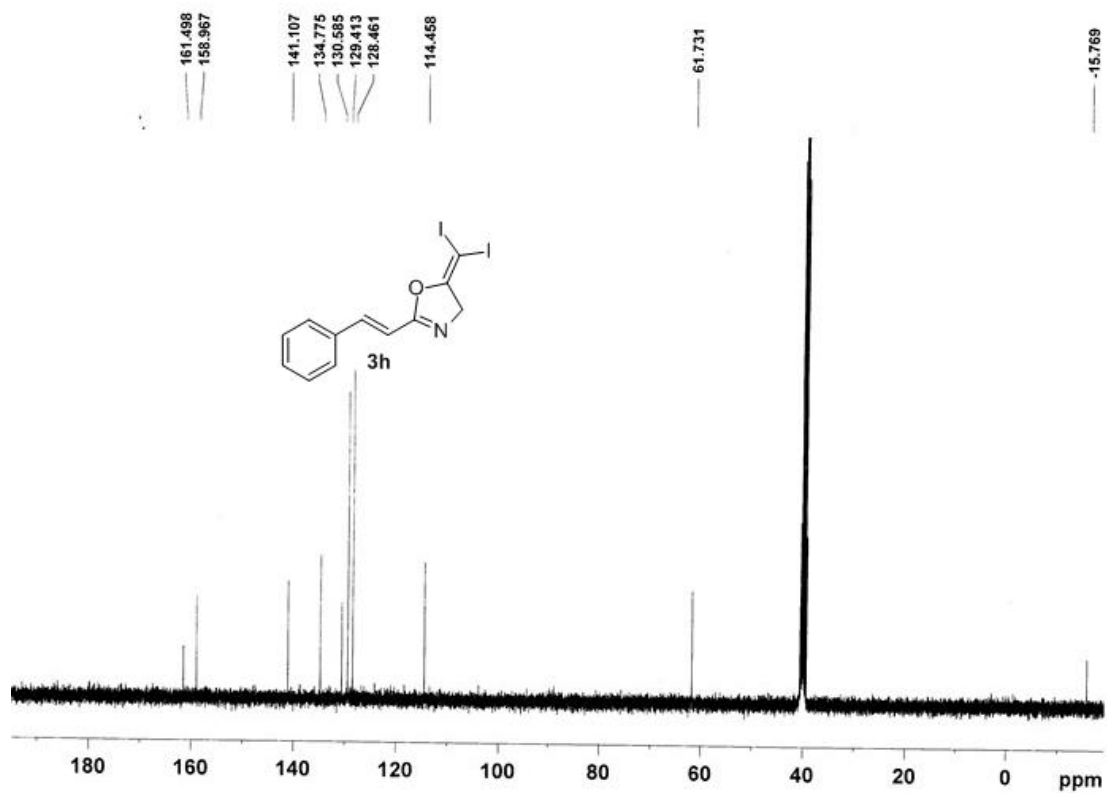

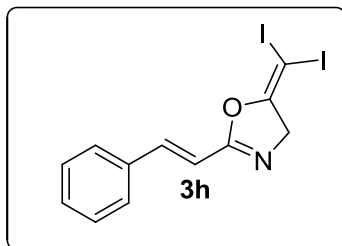

Chemical Formula: C<sub>12</sub>H<sub>9</sub>I<sub>2</sub>NO

Exact Mass: 436.88

Molecular Weight: 437.01

m/z: 436.88 (100.0%), 437.88 (13.1%), 438.88 (1.0%)

Elemental Analysis: C, 32.98; H, 2.08; I, 58.08; N, 3.21; O, 3.66

| Sample Name   | 2014-1219-127-2   | Position    | P1-F8  | Instrument Name | Instrument 1 | User Name              |                        |
|---------------|-------------------|-------------|--------|-----------------|--------------|------------------------|------------------------|
| Inj Vol       | -1                | InjPosition |        | SampleType      | Sample       | IRM Calibration Status | Success                |
| Data Filename | 2014-1219-127-2.d | ACQ Method  | 0103.m | Comment         |              | Acquired Time          | 12/19/2014 10:58:51 AM |

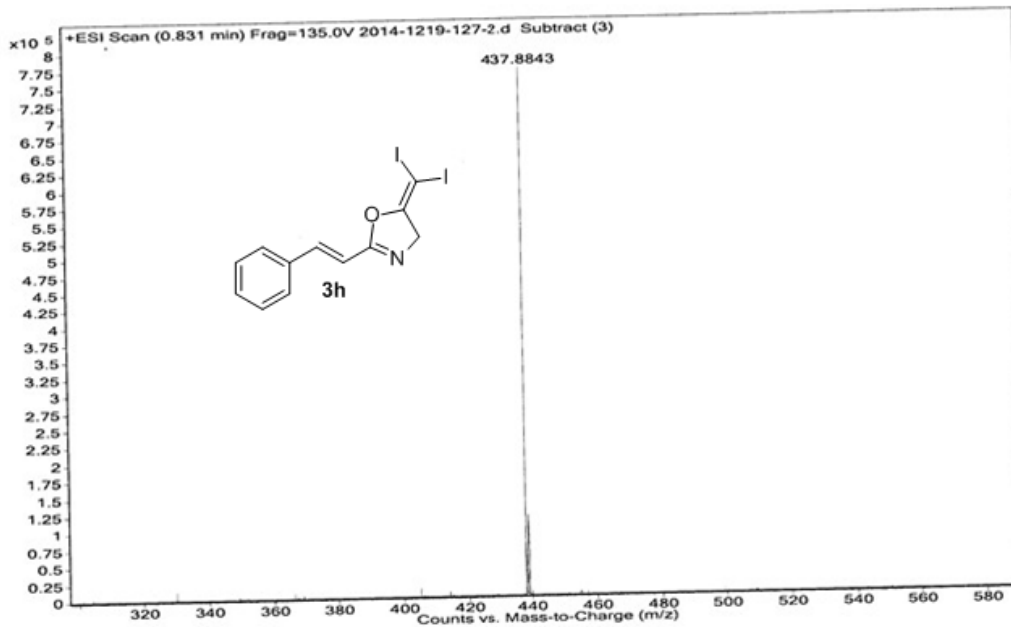

HRMS (ESI, m/z) calcd for C<sub>12</sub>H<sub>9</sub>I<sub>2</sub>NO [M+H]<sup>+</sup> **437.8846**, found **437.8843**.



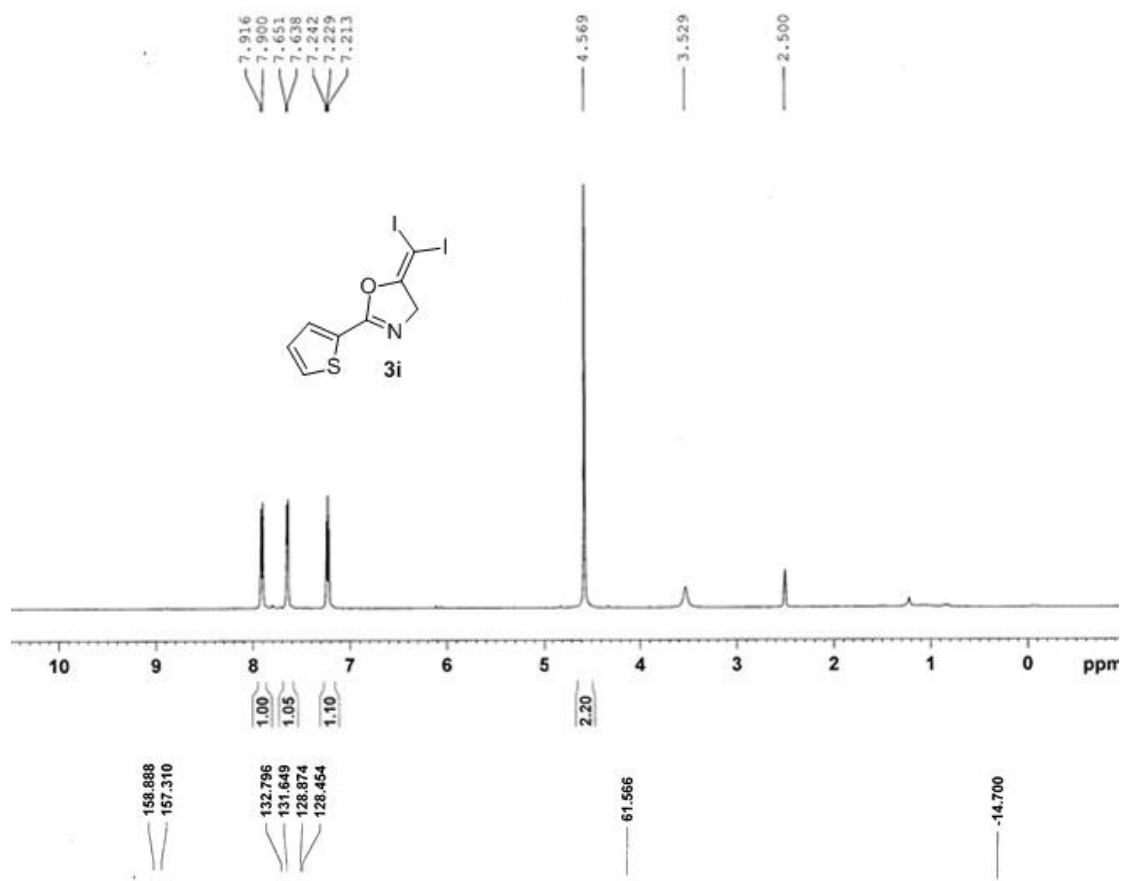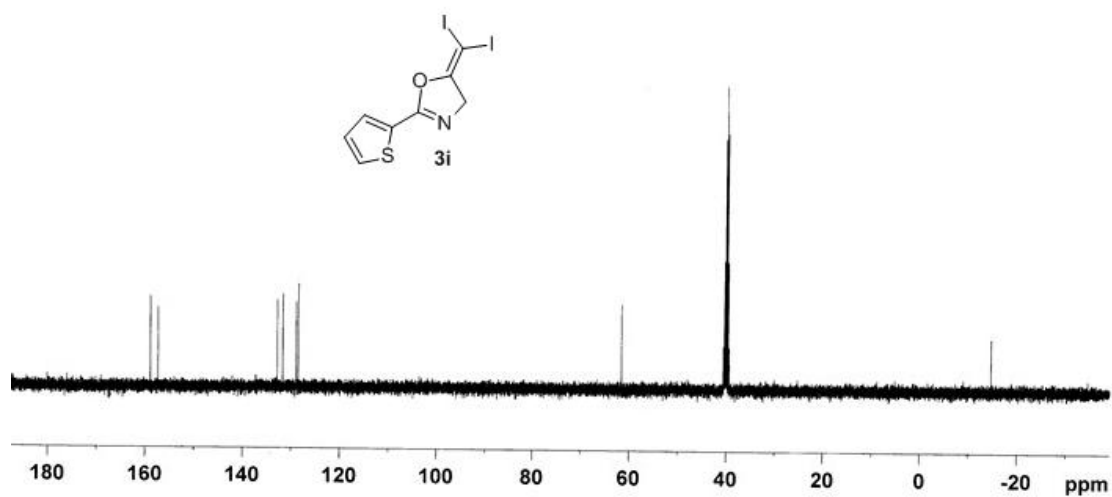

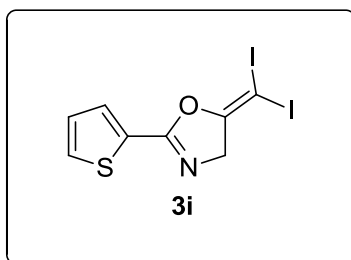

Chemical Formula: C<sub>8</sub>H<sub>5</sub>I<sub>2</sub>NOS

Exact Mass: 416.8181

Molecular Weight: 417.0053

m/z: 416.8181 (100.0%), 417.8215 (8.7%), 418.8139 (4.5%)

Elemental Analysis: C, 23.04; H, 1.21; I, 60.86; N, 3.36; O, 3.84; S, 7.69

| Sample Name   | 2014-1215-ZS-125-2   | Position    | P1-D2  | Instrument Name | Instrument 1 | User Name              |                        |
|---------------|----------------------|-------------|--------|-----------------|--------------|------------------------|------------------------|
| Inj Vol       | -1                   | InjPosition |        | SampleType      | Sample       | IRM Calibration Status | Success                |
| Data Filename | 2014-1215-ZS-125-2.d | ACQ Method  | 0103.m | Comment         |              | Acquired Time          | 12/15/2014 11:10:27 AM |

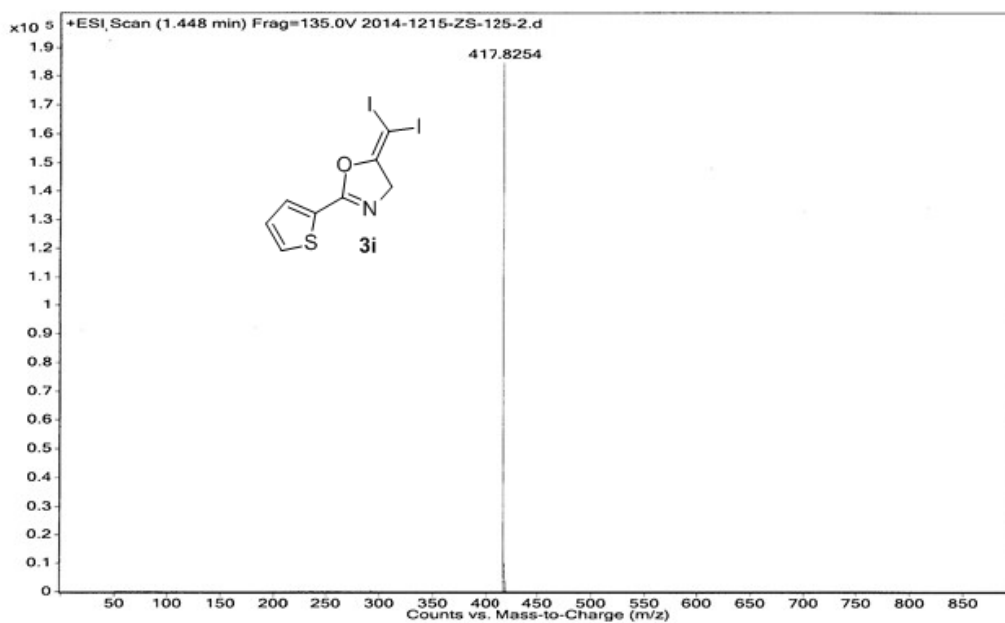

HRMS (ESI, m/z) calcd for C<sub>8</sub>H<sub>5</sub>I<sub>2</sub>NOS [M+H]<sup>+</sup> **417.8254**, found **417.8254**.

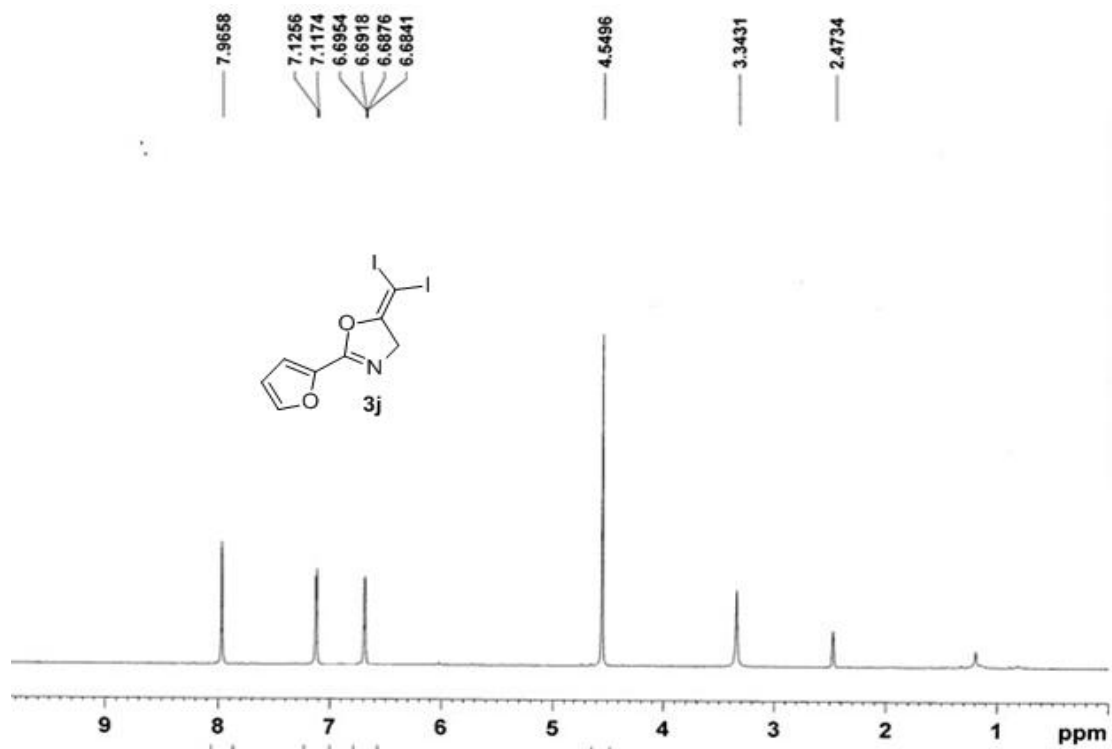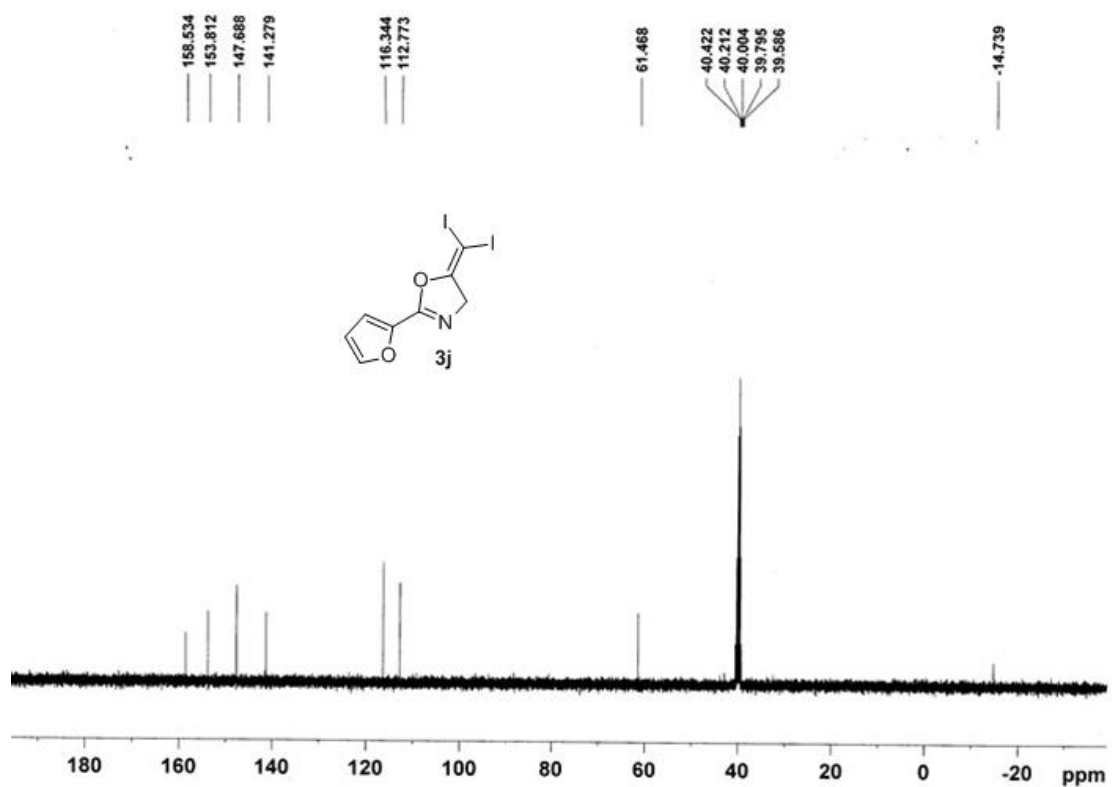

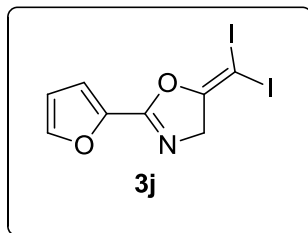

Chemical Formula: C<sub>8</sub>H<sub>5</sub>I<sub>2</sub>NO<sub>2</sub>

Exact Mass: 400.84

Molecular Weight: 400.94

m/z: 400.84 (100.0%), 401.84 (9.0%)

Elemental Analysis: C, 23.97; H, 1.26; I, 63.30; N, 3.49; O, 7.98

| Sample Name   | 2014-1215-ZS-127-1   | Position    | P1-E2  | Instrument Name | Instrument 1 | User Name              |                        |
|---------------|----------------------|-------------|--------|-----------------|--------------|------------------------|------------------------|
| Inj Vol       | -1                   | InjPosition |        | SampleType      | Sample       | IRM Calibration Status | Success                |
| Data Filename | 2014-1215-ZS-127-1.d | ACQ Method  | 0103.m | Comment         |              | Acquired Time          | 12/15/2014 11:08:10 AM |

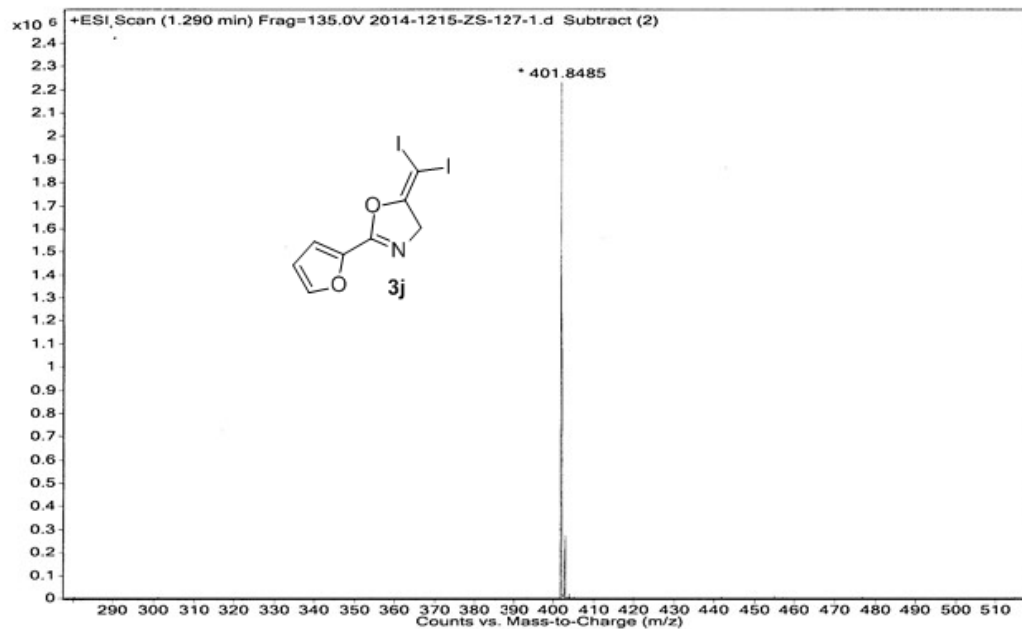

HRMS (ESI, m/z) calcd for C<sub>8</sub>H<sub>5</sub>I<sub>2</sub>NO [M+H]<sup>+</sup> **401.8482**, found **401.8485**.

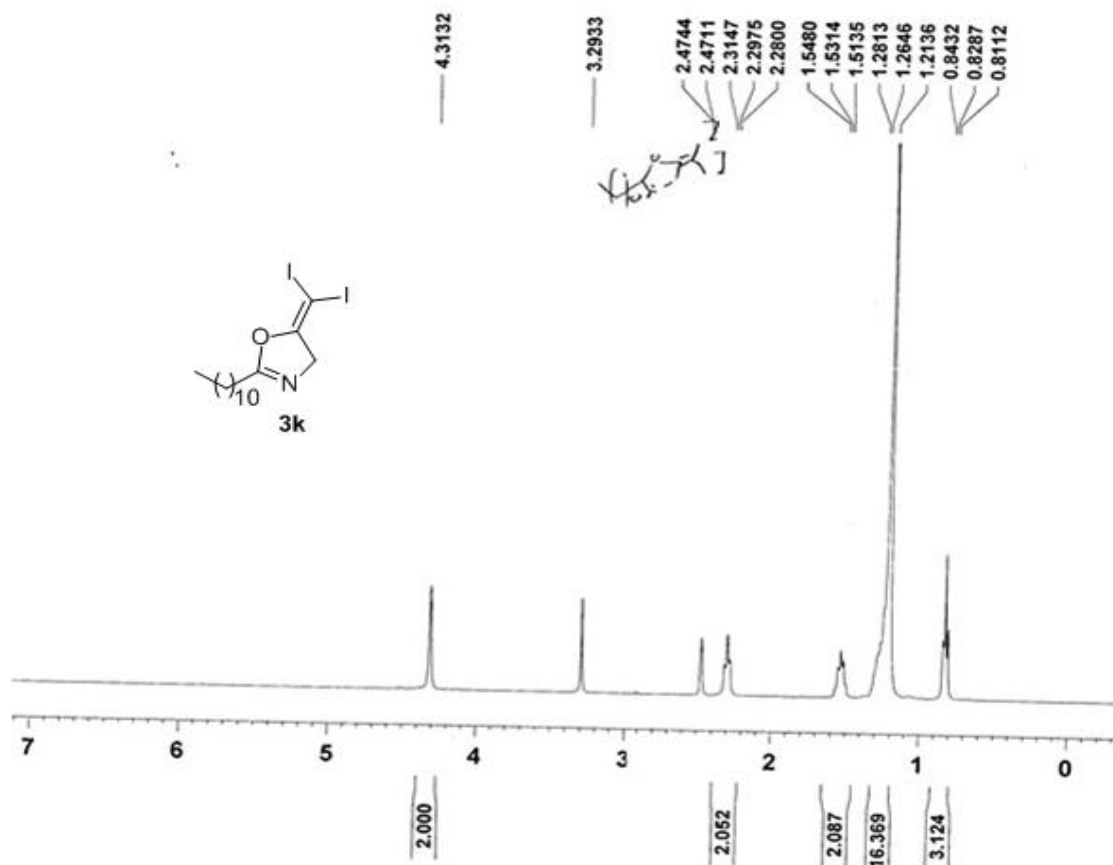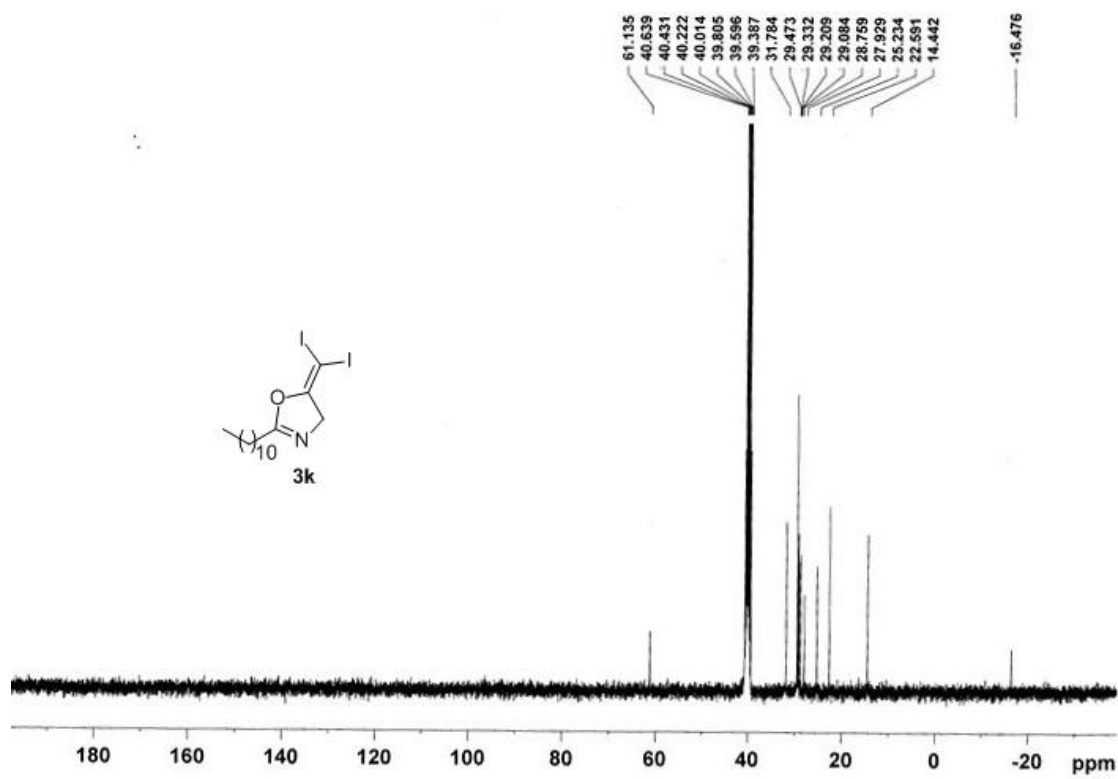

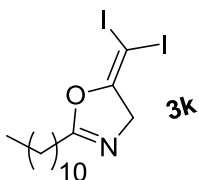

Chemical Formula:  $C_{15}H_{25}I_2NO$

Exact Mass: 489.0026

Molecular Weight: 489.1740

m/z: 489.0026 (100.0%), 490.0059 (16.2%), 491.0093 (1.2%)

Elemental Analysis: C, 36.83; H, 5.15; I, 51.89; N, 2.86; O, 3.27

| Sample Name   | 150109-ZS-174-5   | Position     | P1-E6  | Instrument Name | Instrument 1 | User Name              |                      |
|---------------|-------------------|--------------|--------|-----------------|--------------|------------------------|----------------------|
| Inj Vol       | -1                | Inj Position |        | Sample Type     | Sample       | IRM Calibration Status | Success              |
| Data Filename | 150109-ZS-174-5.d | ACQ Method   | 0103.m | Comment         |              | Acquired Time          | 1/9/2015 10:07:41 AM |

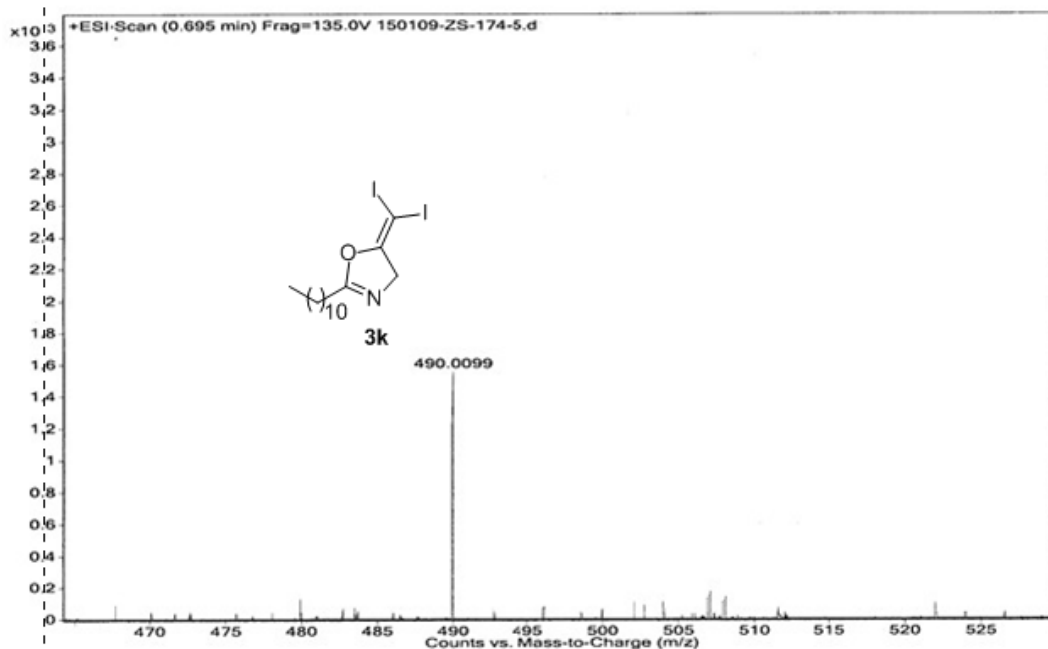

HRMS (ESI, m/z) calcd for  $C_{15}H_{25}I_2NO [M+H]^+$  **490.0098**, found **490.0099**.

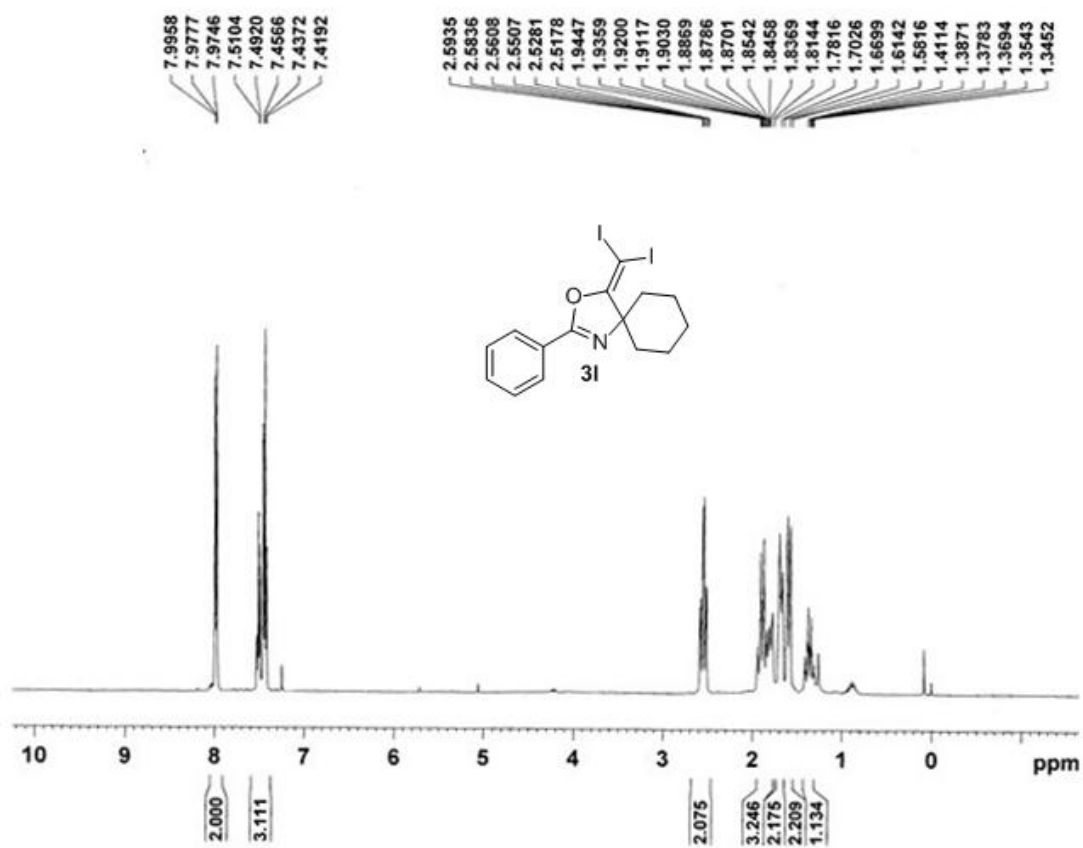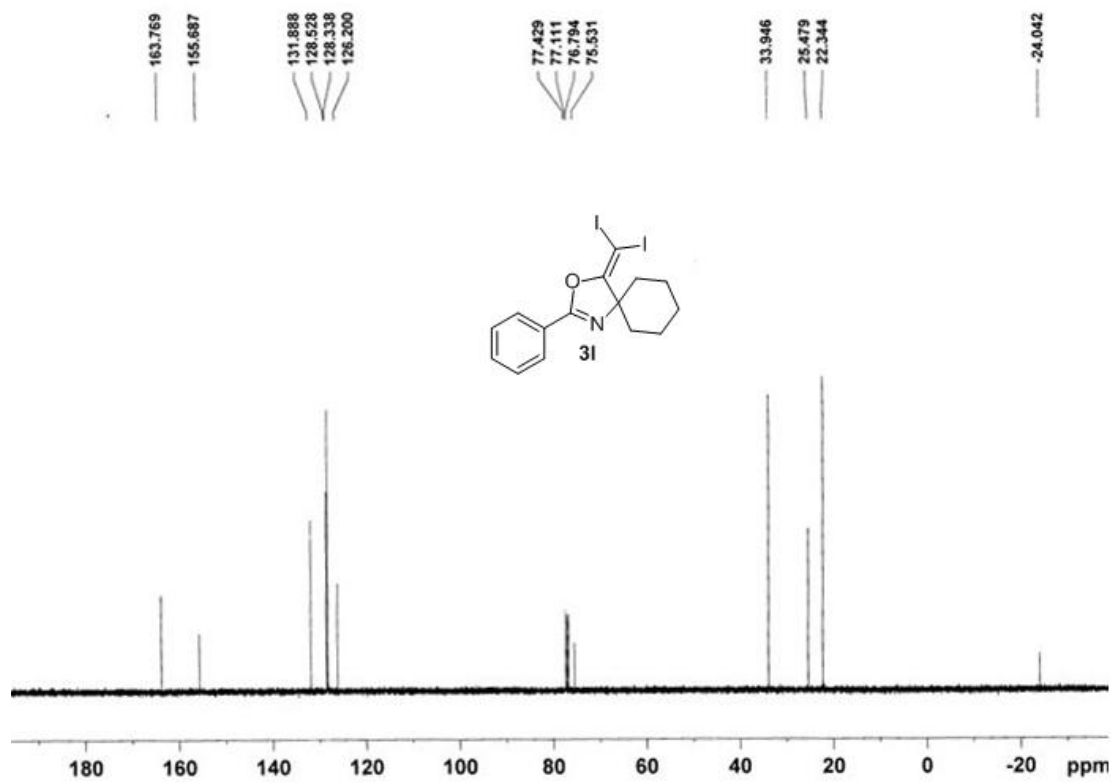

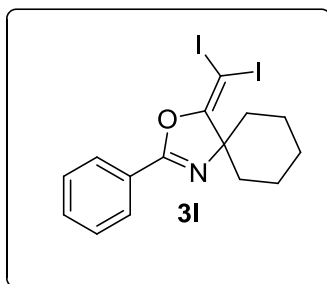

Chemical Formula: C<sub>15</sub>H<sub>15</sub>I<sub>2</sub>NO

Exact Mass: 478.92

Molecular Weight: 479.09

m/z: 478.92 (100.0%), 479.93 (16.4%), 480.93 (1.5%)

Elemental Analysis: C, 37.60; H, 3.16; I, 52.98; N, 2.92; O, 3.34

| Sample Name   | 2014-1229-ZS-154-1   | Position    | P1-B9  | Instrument Name | Instrument 1 | User Name              |                        |
|---------------|----------------------|-------------|--------|-----------------|--------------|------------------------|------------------------|
| Inj Vol       | -1                   | InjPosition |        | SampleType      | Sample       | IRM Calibration Status | Success                |
| Data Filename | 2014-1229-ZS-154-1.d | ACQ Method  | 0103.m | Comment         |              | Acquired Time          | 12/29/2014 10:30:49 AM |

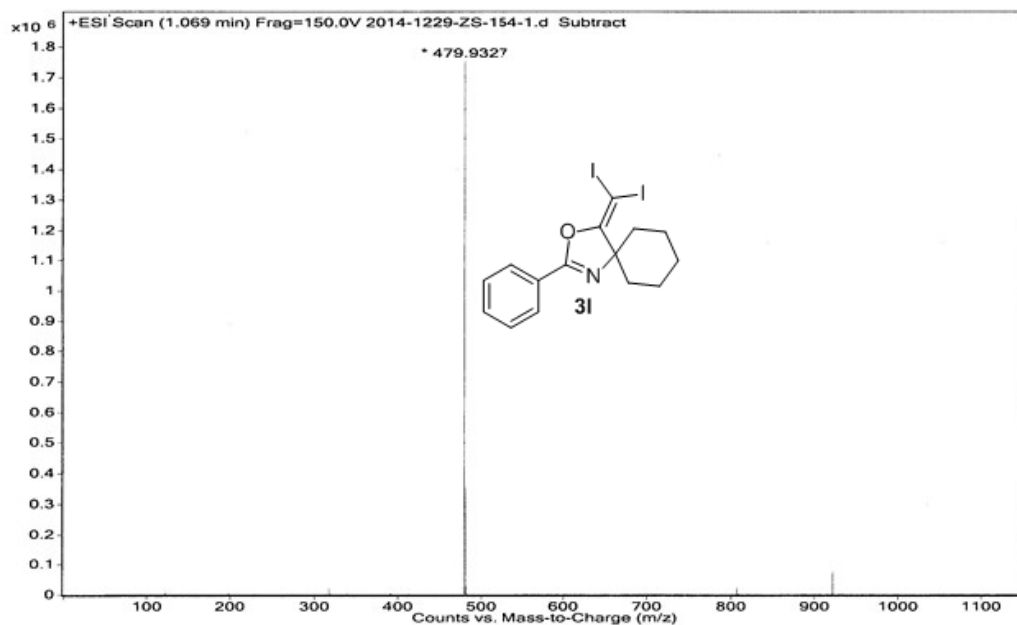

HRMS (ESI, m/z) calcd for C<sub>15</sub>H<sub>15</sub>I<sub>2</sub>NO [M+H]<sup>+</sup> **479.9316**, found **479.9327**.



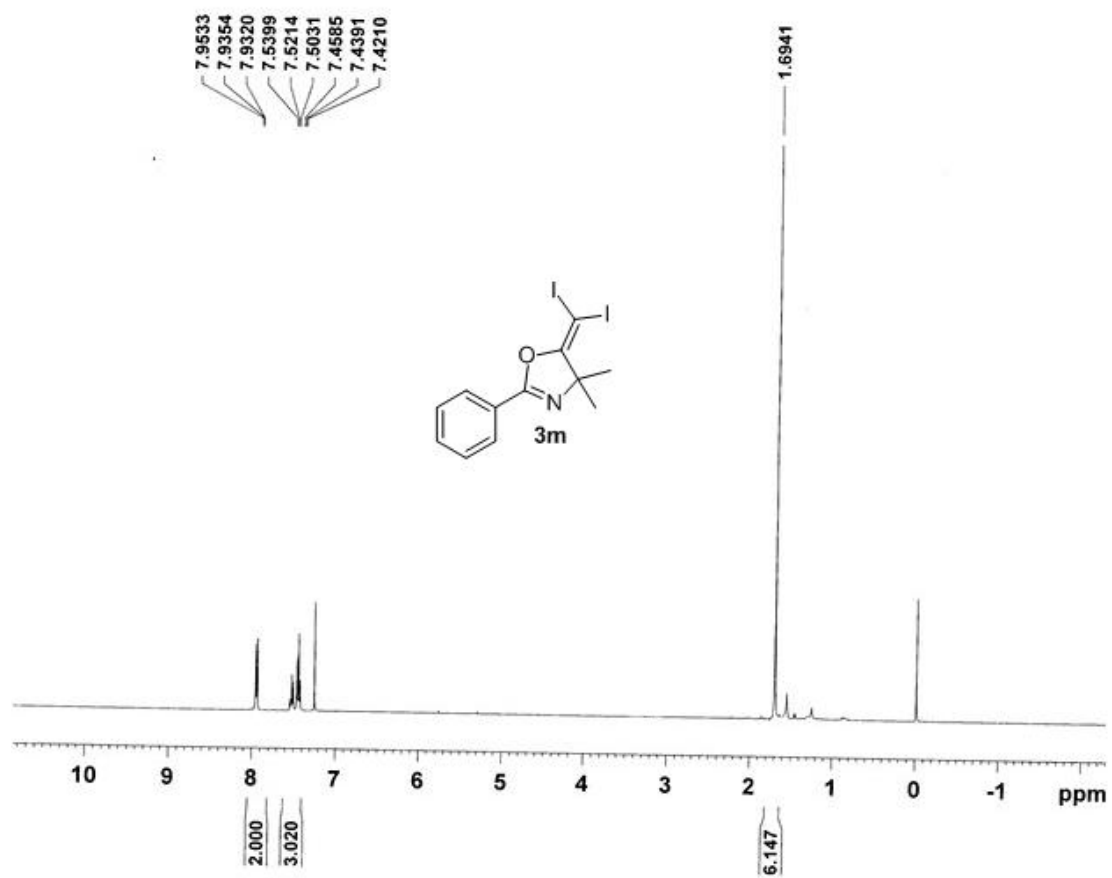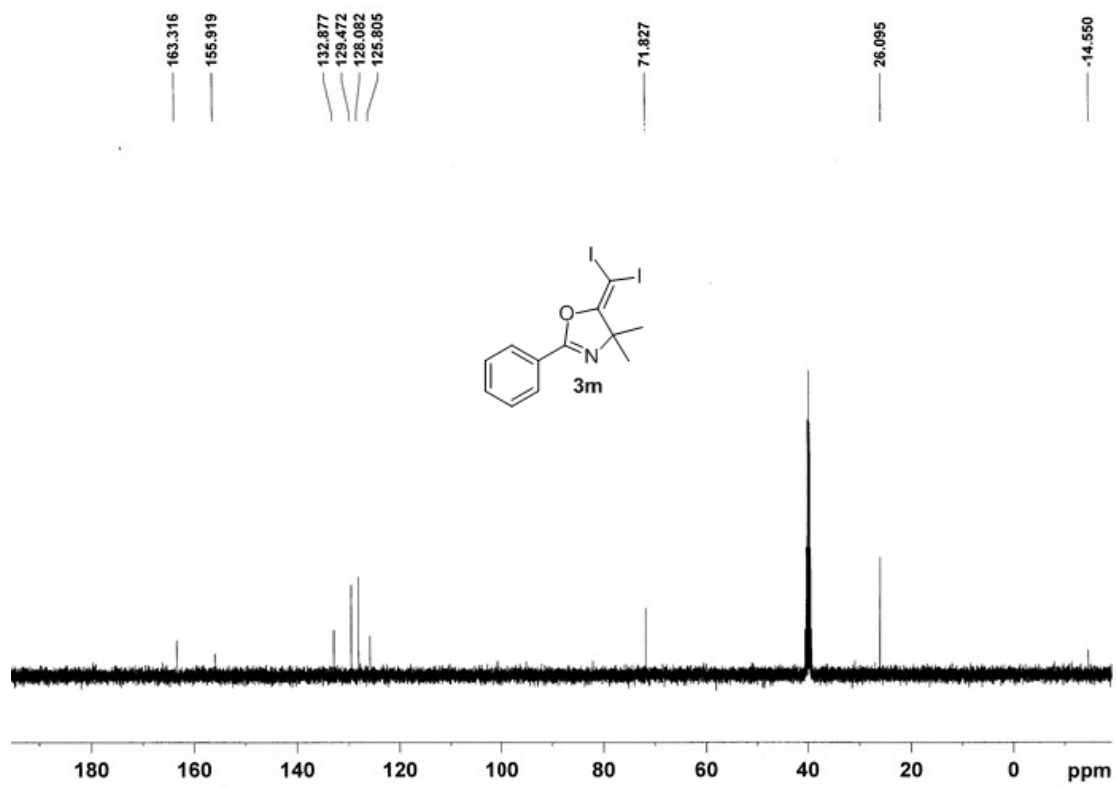

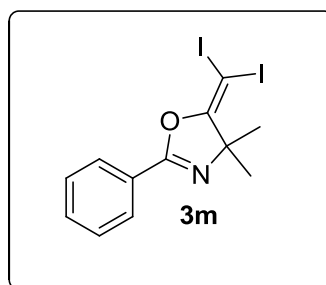

Chemical Formula: C<sub>12</sub>H<sub>11</sub>I<sub>2</sub>NO

Exact Mass: 438.89

Molecular Weight: 439.03

m/z: 438.89 (100.0%), 439.90 (13.1%)

Elemental Analysis: C, 32.83; H, 2.53; I, 57.81; N, 3.19; O, 3.64

| Sample Name   | 2014-1215-ZS-122-3   | Position    | P1-C1  | Instrument Name | Instrument 1 | User Name              |                        |
|---------------|----------------------|-------------|--------|-----------------|--------------|------------------------|------------------------|
| Inj Vol       | -1                   | InjPosition |        | SampleType      | Sample       | IRM Calibration Status | Success                |
| Data Filename | 2014-1215-ZS-122-3.d | ACQ Method  | 0103.m | Comment         |              | Acquired Time          | 12/15/2014 10:46:31 AM |

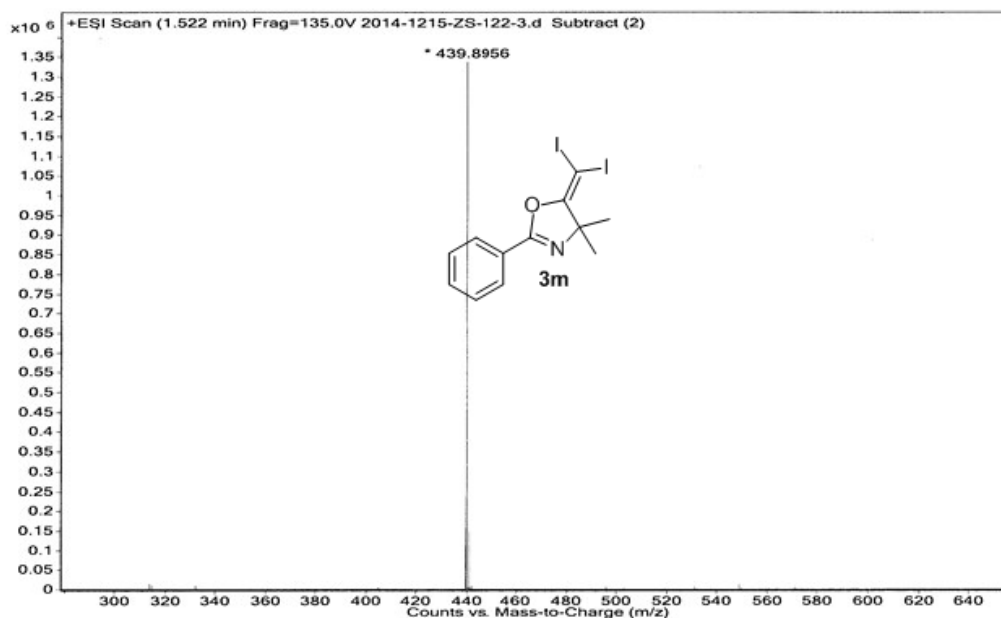

HRMS (ESI, m/z) calcd for C<sub>12</sub>H<sub>11</sub>I<sub>2</sub>NO [M+H]<sup>+</sup> **439.9003**, found **439.8956**.

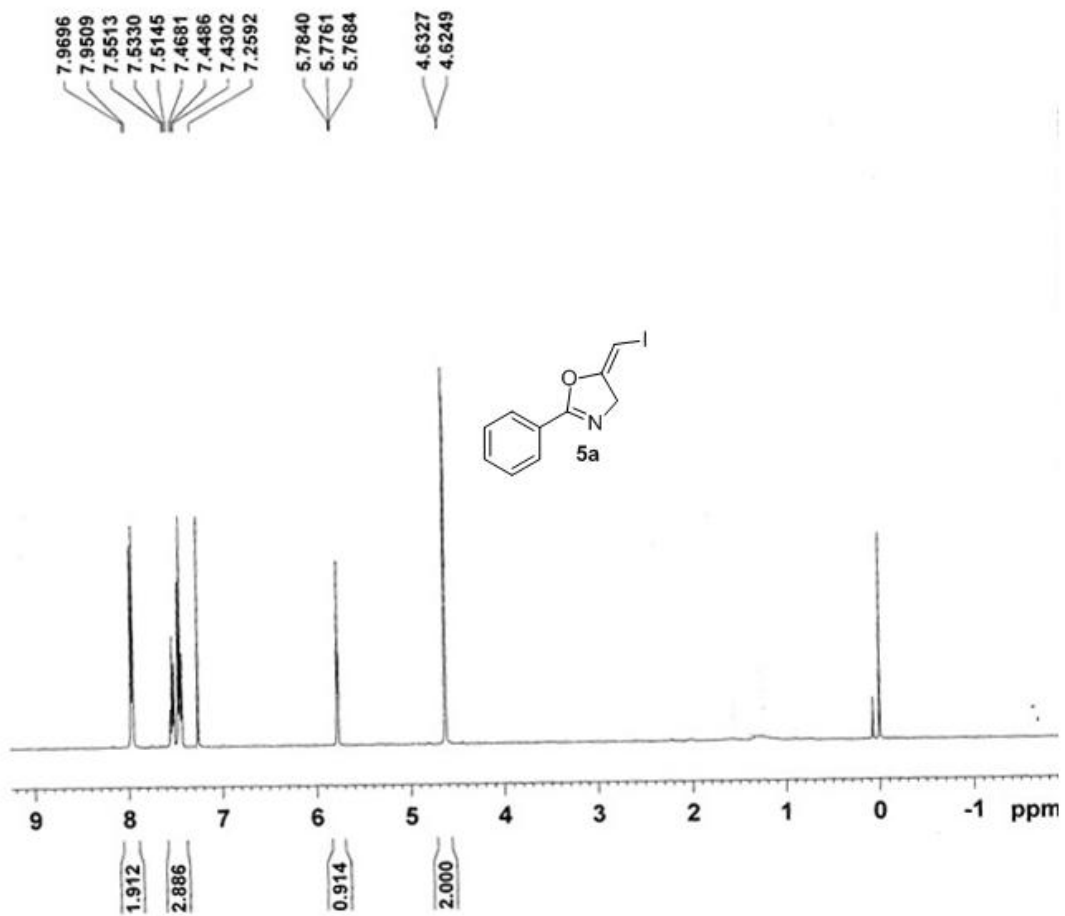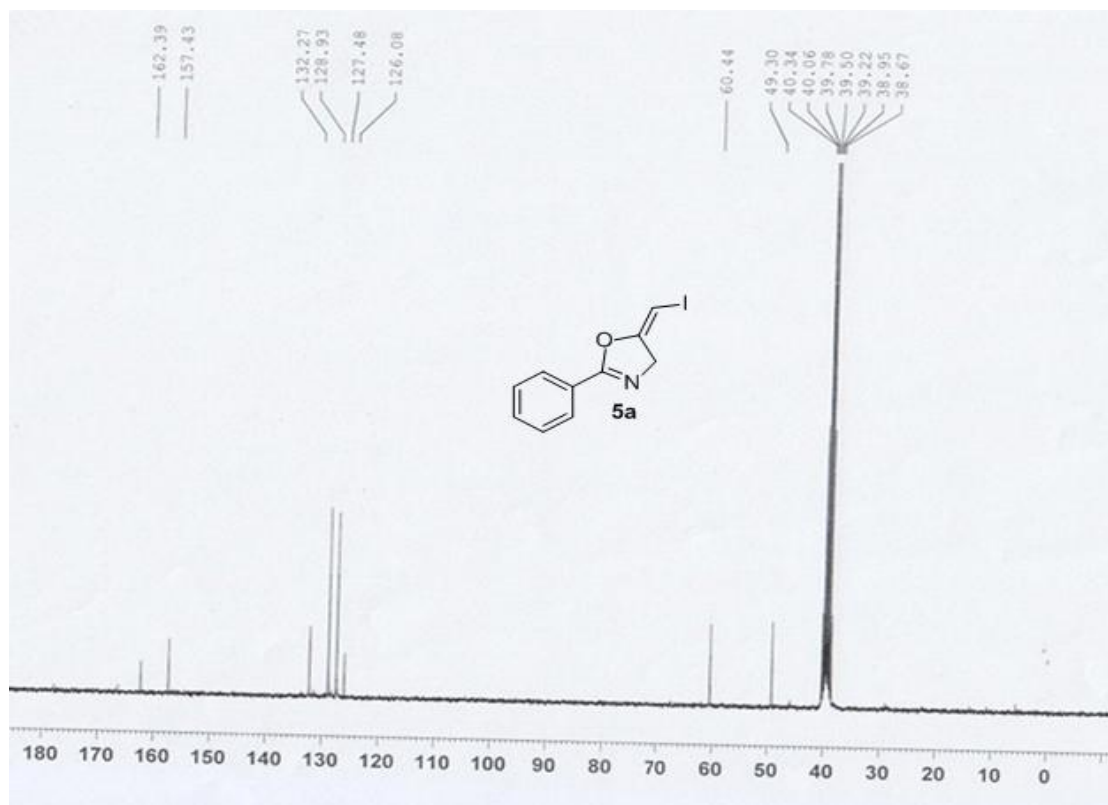

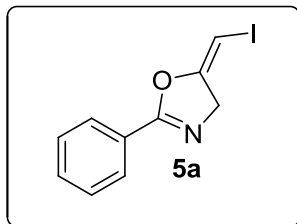

Chemical Formula: C<sub>10</sub>H<sub>8</sub>INO

Exact Mass: 284.97

Molecular Weight: 285.08

m/z: 284.97 (100.0%), 285.97 (10.9%)

Elemental Analysis: C, 42.13; H, 2.83; I, 44.52; N, 4.91; O, 5.61

| Inj Vol       | Inj Position       | Sample Type | Sample | IRM Calibration Status | Success                |
|---------------|--------------------|-------------|--------|------------------------|------------------------|
| 1             |                    |             |        |                        |                        |
| Data Filename | 2014-12-19-130-1.d | ACQ Method  | 0103.m | Comment                | 12/19/2014 11:02:34 AM |

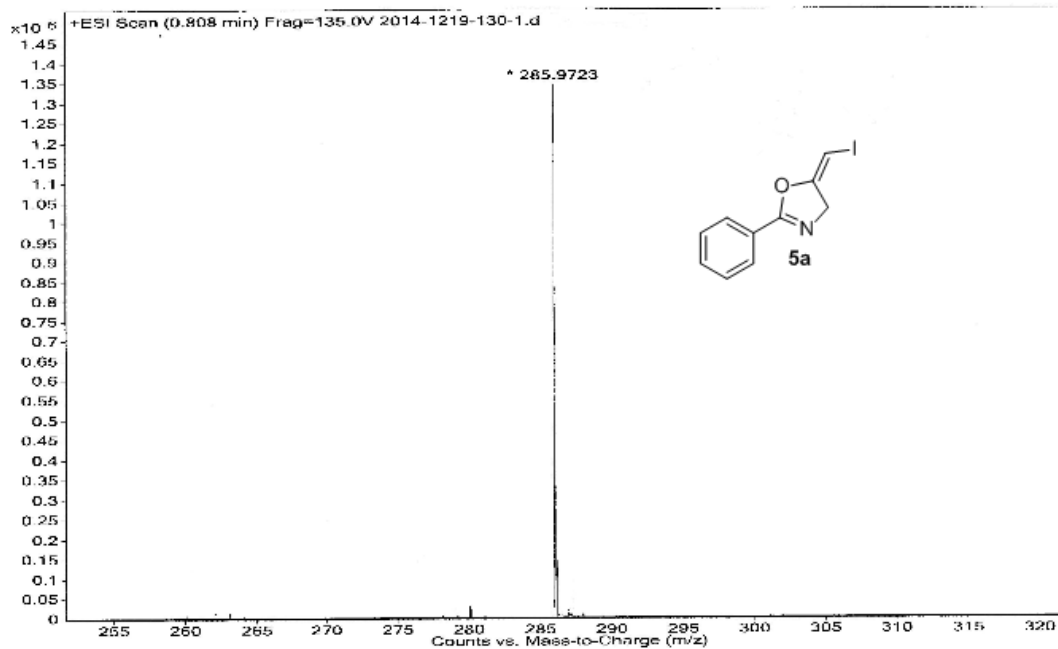

HRMS (ESI, m/z) calcd for C<sub>10</sub>H<sub>8</sub>INO [M+H]<sup>+</sup> **285.9723**, found **285.9723**.

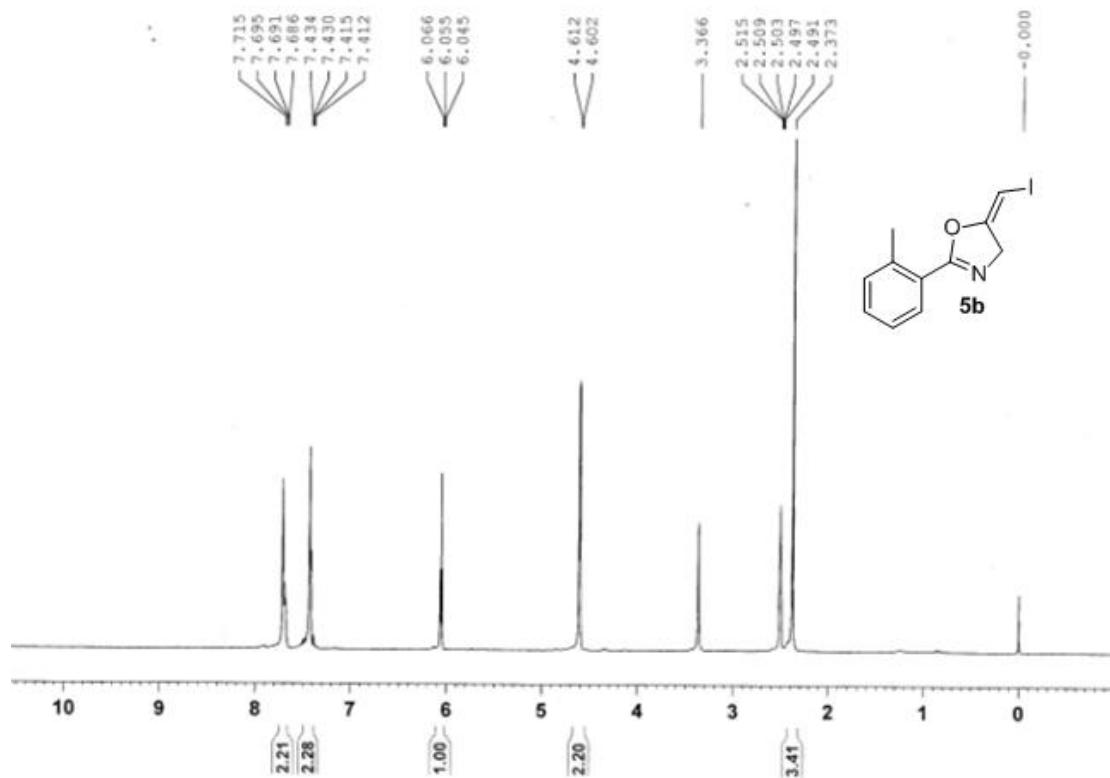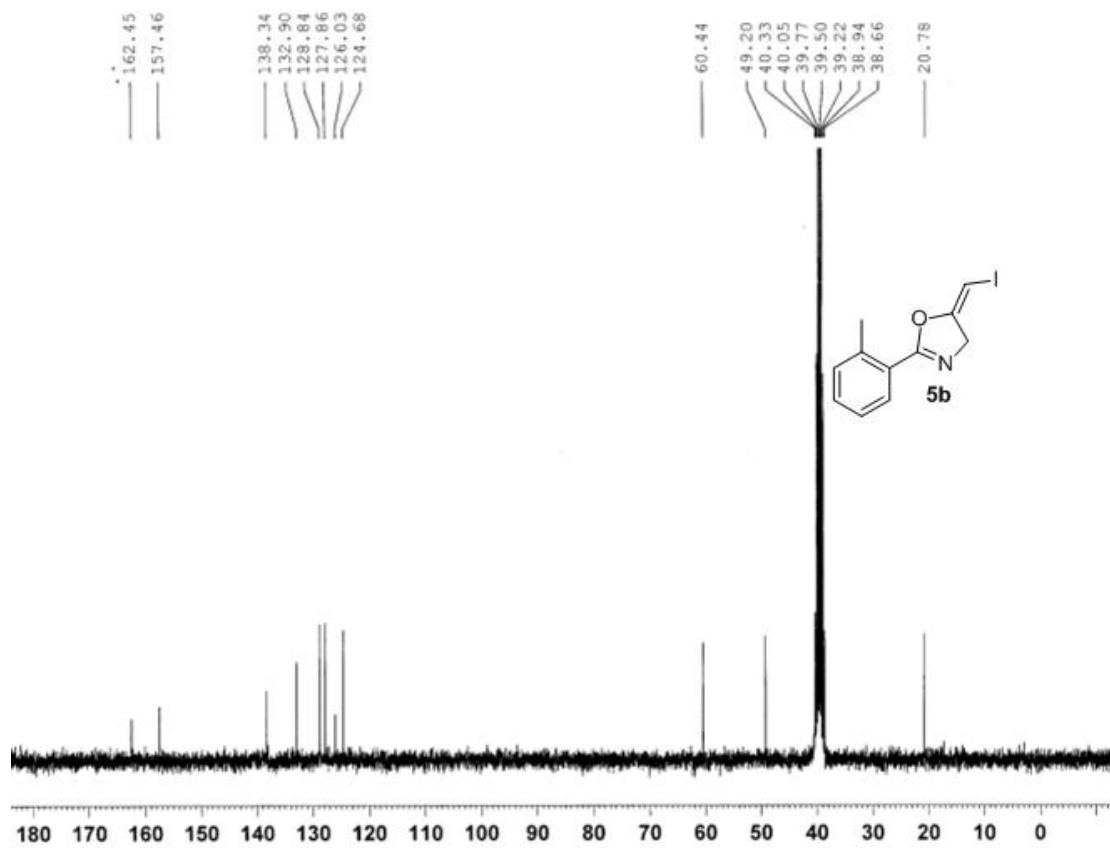

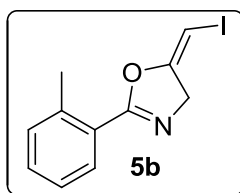

Chemical Formula: C<sub>11</sub>H<sub>10</sub>INO

Exact Mass: 298.98

Molecular Weight: 299.11

m/z: 298.98 (100.0%), 299.98 (12.3%)

Elemental Analysis: C, 44.17; H, 3.37; I, 42.43; N, 4.68; O, 5.35

| Sample Name   | 20141122-ZS-3-black | Position    | P1-C8  | Instrument Name | Instrument 1 | User Name              |                |
|---------------|---------------------|-------------|--------|-----------------|--------------|------------------------|----------------|
| Inj Vol       | -1                  | InjPosition |        | SampleType      | Sample       | IRM Calibration Status | Success        |
| Data Filename | 20141122-ZS-3-black | ACQ Method  | 0103.m | Comment         |              | Acquired Time          | 12/5/2014 10:1 |

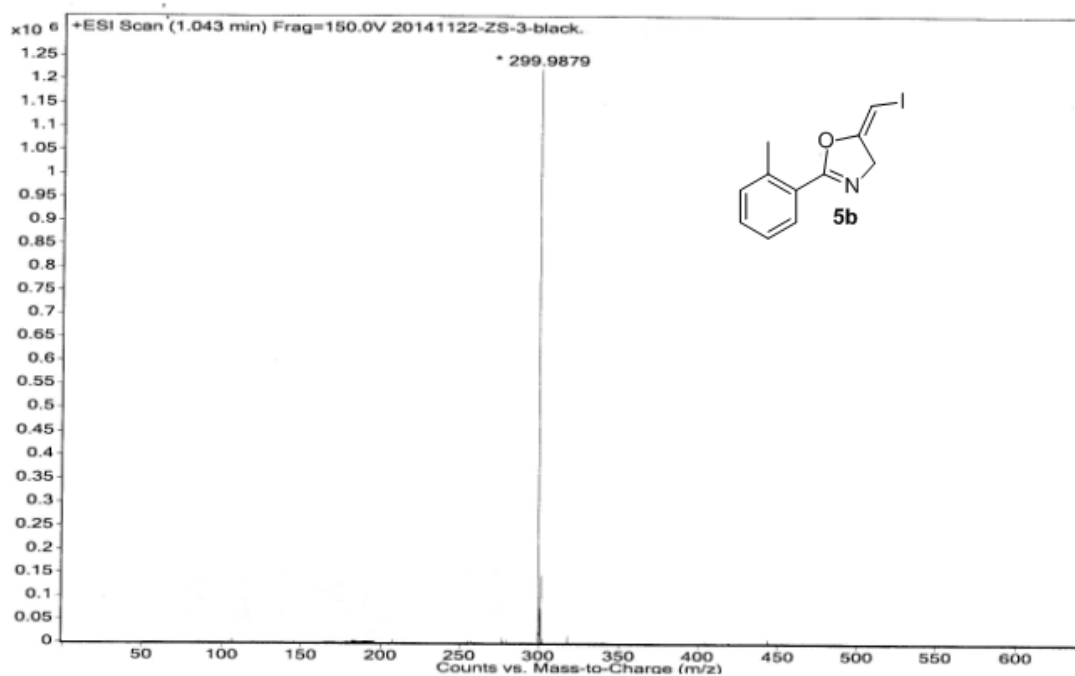

HRMS (ESI, m/z) calcd for C<sub>11</sub>H<sub>10</sub>INO [M+H]<sup>+</sup> **299.9880**, found **299.9879**.

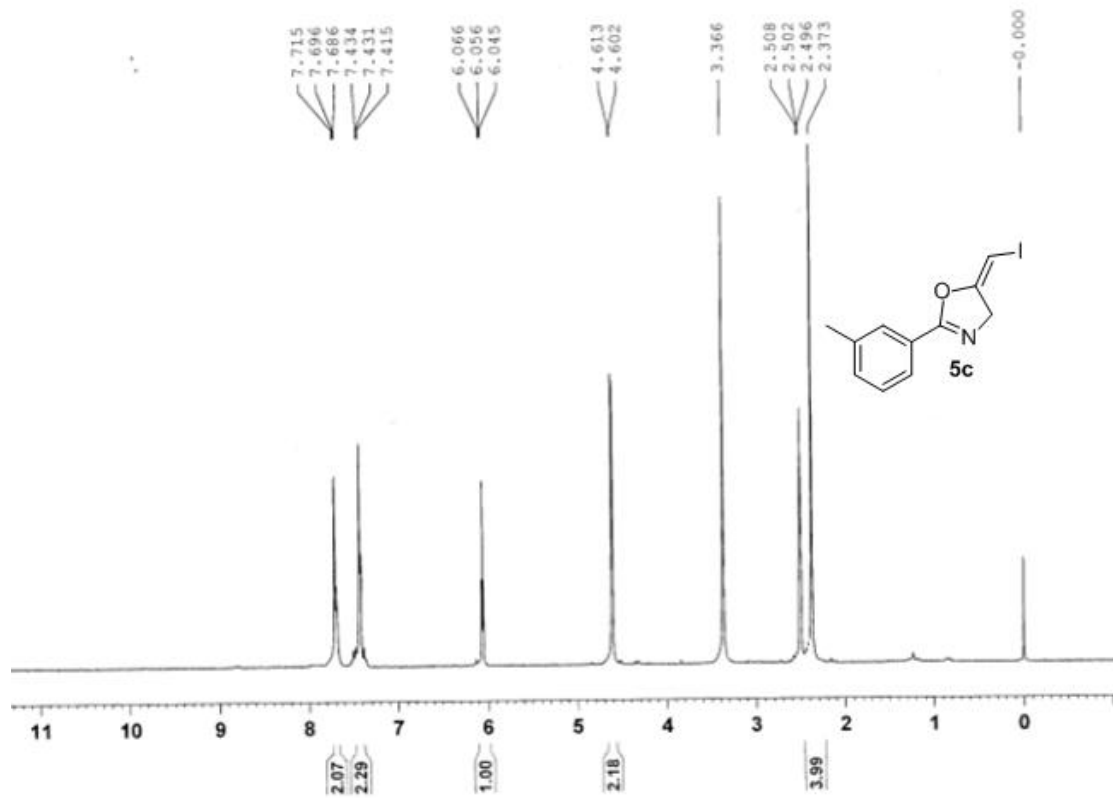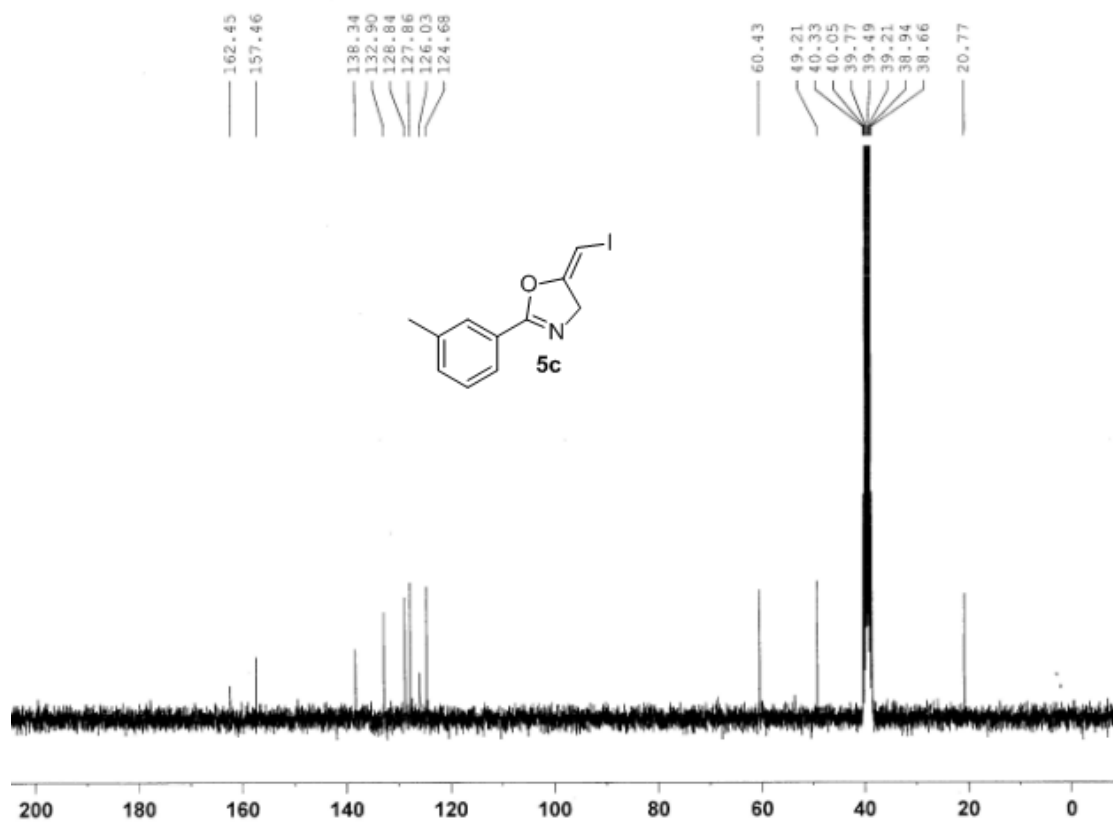

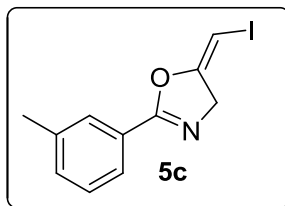

Chemical Formula: C<sub>11</sub>H<sub>10</sub>INO

Exact Mass: 298.98

Molecular Weight: 299.11

m/z: 298.98 (100.0%), 299.98 (12.3%)

Elemental Analysis: C, 44.17; H, 3.37; I, 42.43; N, 4.68; O, 5.35

| Sample Name   | 2014-1127-zs-4   | Position    | P1-D2  | Instrument Name | Instrument 1 | User Name              | IRH Calibration Status | Success            |
|---------------|------------------|-------------|--------|-----------------|--------------|------------------------|------------------------|--------------------|
| Inj Vol       | -1               | InjPosition |        | SampleType      | Sample       | IRH Calibration Status |                        | 11/27/2014 9:40:51 |
| Data Filename | 2014-1127-zs-4.d | ACQ Method  | 0103.m | Comment         |              | Acquired Time          |                        |                    |

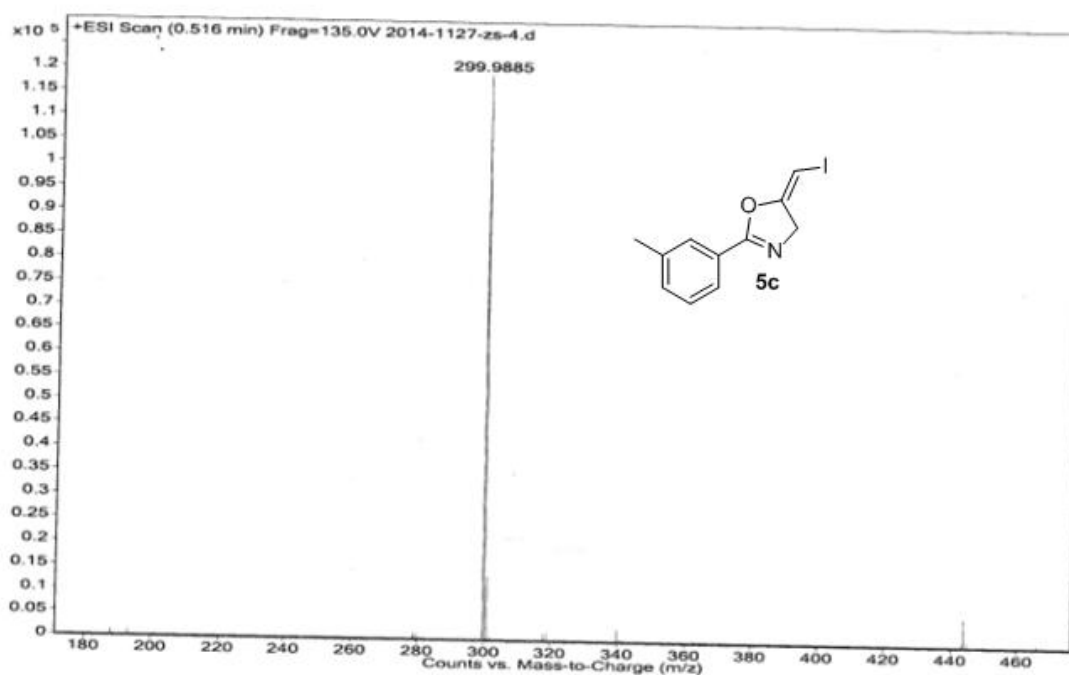

HRMS (ESI, m/z) calcd for C<sub>11</sub>H<sub>10</sub>INO [M+H]<sup>+</sup> **299.9880**, found **299.9885**.



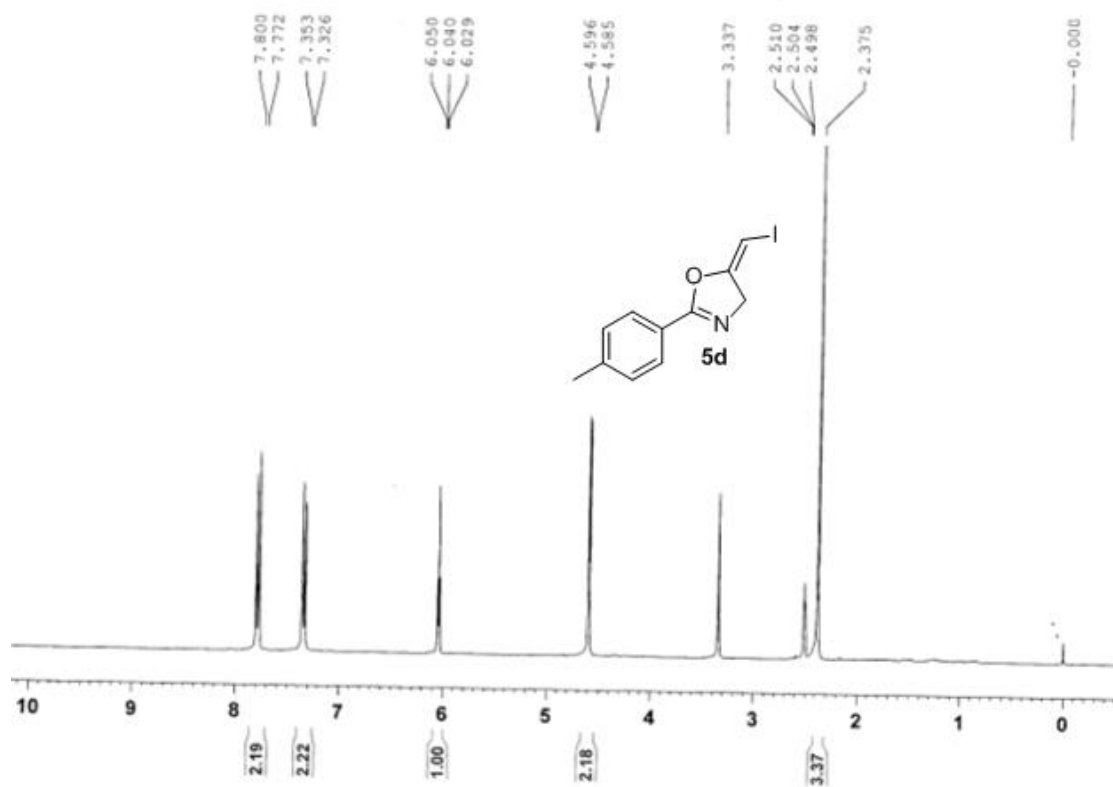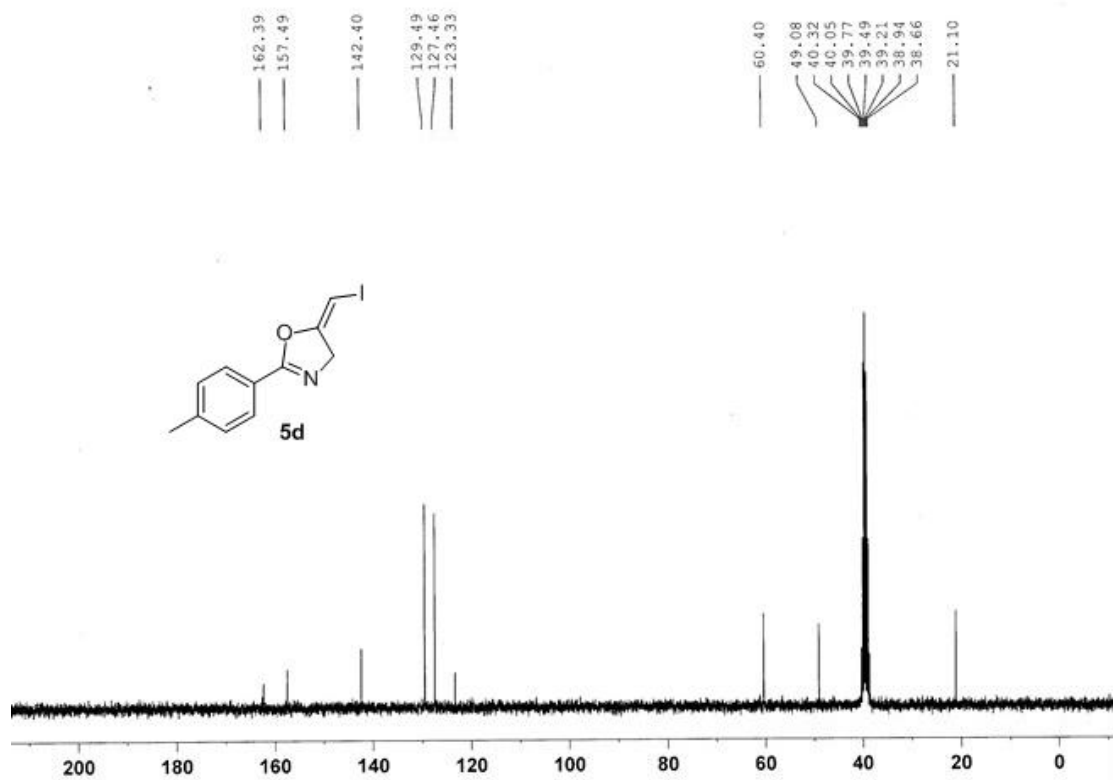

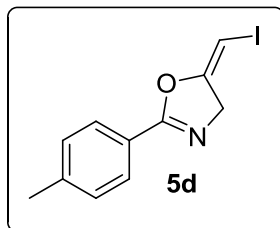

Chemical Formula: C<sub>11</sub>H<sub>10</sub>INO

Exact Mass: 298.98

Molecular Weight: 299.11

m/z: 298.98 (100.0%), 299.98 (12.3%)

Elemental Analysis: C, 44.17; H, 3.37; I, 42.43; N, 4.68; O, 5.35

| Sample Name   | 20141122-ZS | Position    | P1-C8  | Instrument Name | Instrument 1 | User Name              |           |
|---------------|-------------|-------------|--------|-----------------|--------------|------------------------|-----------|
| Inj Vol       | -1          | InjPosition |        | SampleType      | Sample       | IRM Calibration Status | Success   |
| Data Filename | 20141122-ZS | ACQ Method  | 0103.m | Comment         |              | Acquired Time          | 12/5/2014 |

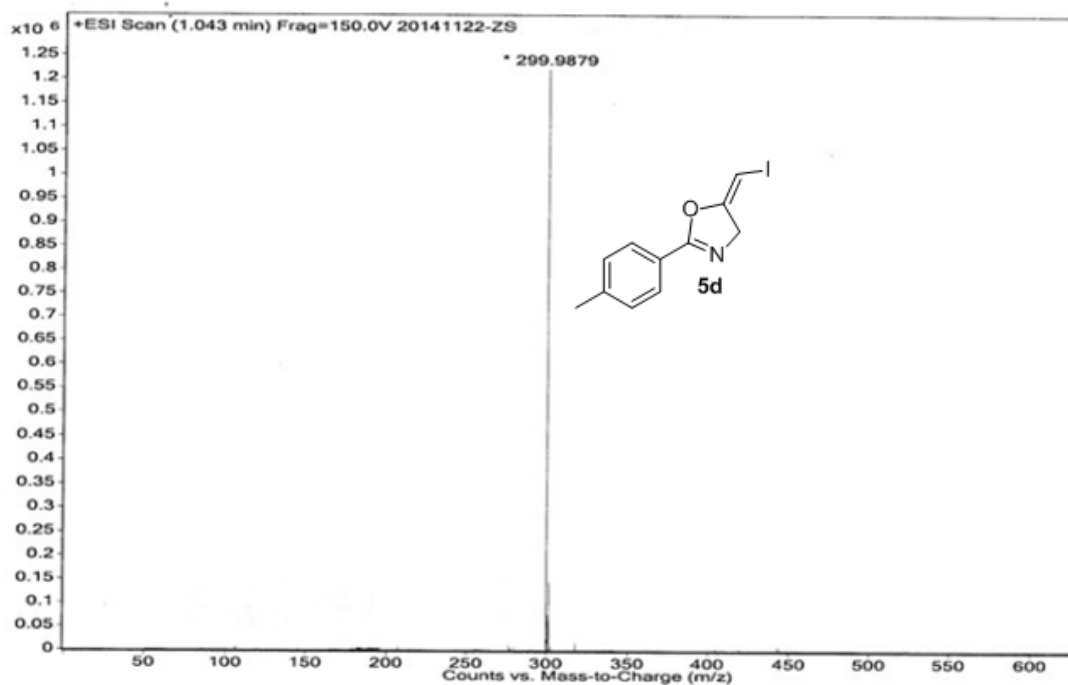

HRMS (ESI, m/z) calcd for C<sub>11</sub>H<sub>10</sub>INO [M+H]<sup>+</sup> **299.9880**, found **299.9879**.

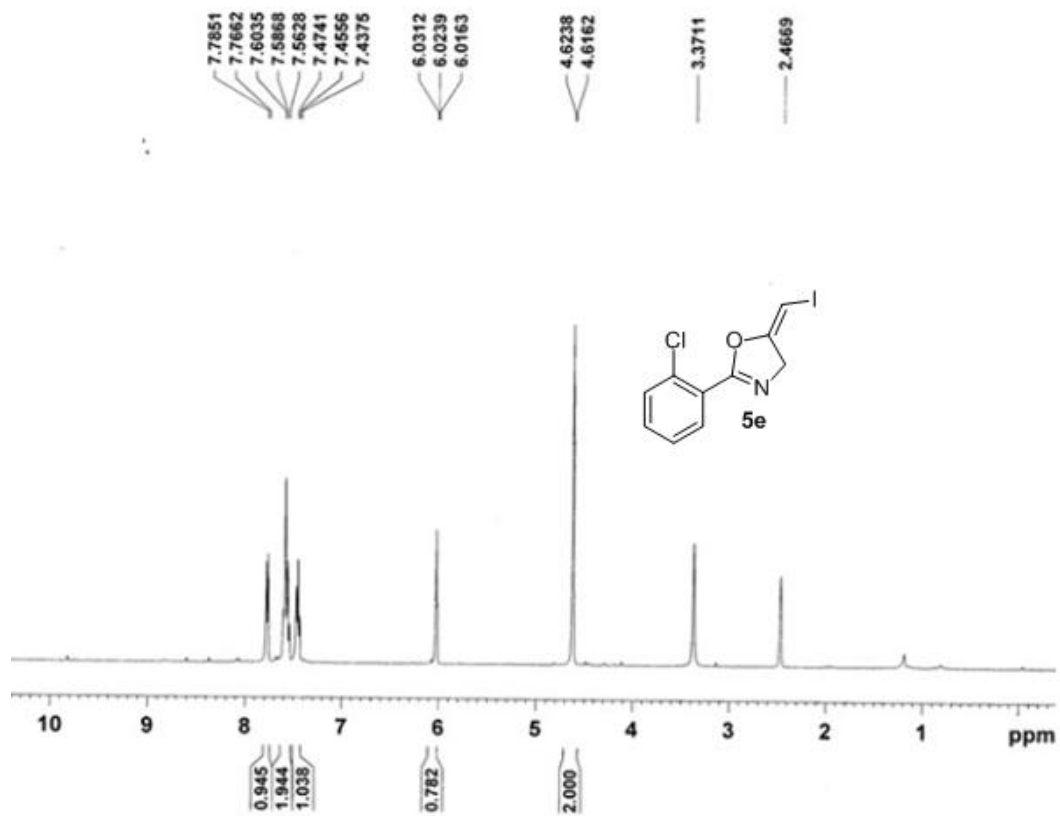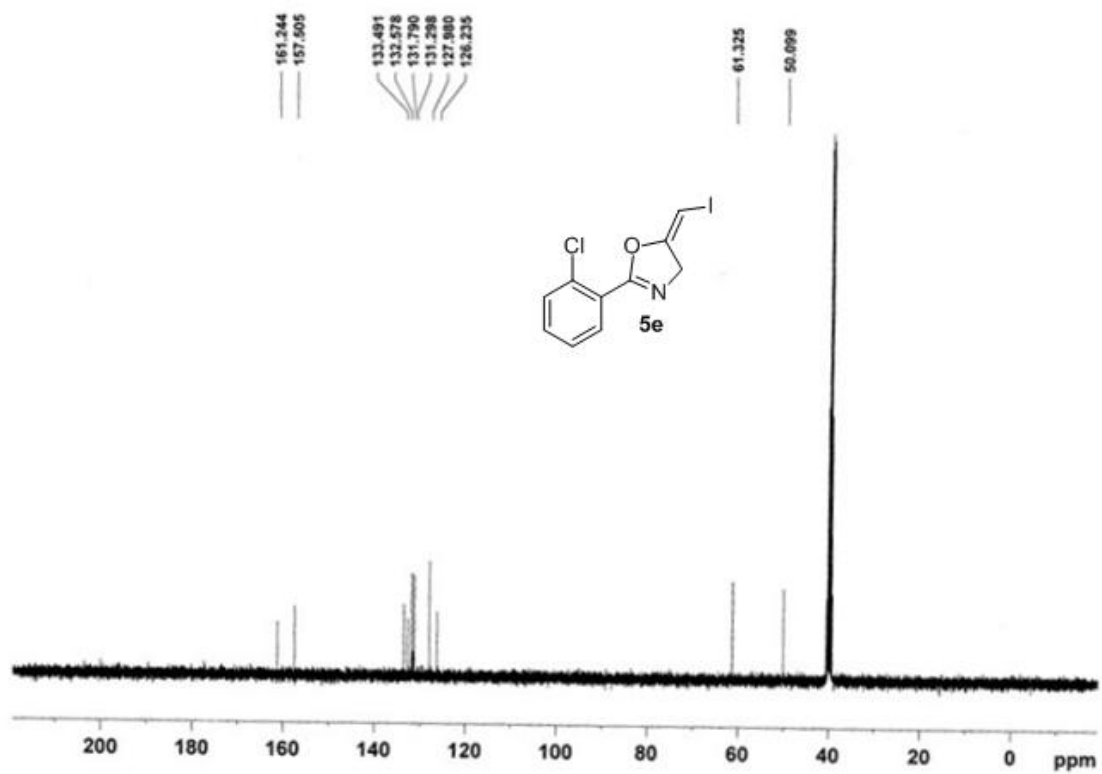

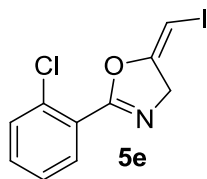

Chemical Formula: C<sub>10</sub>H<sub>7</sub>ClINO

Exact Mass: 318.9261

Molecular Weight: 319.5261

m/z: 318.9261 (100.0%), 320.9231 (32.0%), 319.9294 (10.8%), 321.9265 (3.5%)

Elemental Analysis: C, 37.59; H, 2.21; Cl, 11.10; I, 39.72; N, 4.38; O, 5.01

| Sample Name   | 2014-1215-ZS-122-2   | Position    | PI-A1  | Instrument Name | Instrument 1 | User Name              |                        |
|---------------|----------------------|-------------|--------|-----------------|--------------|------------------------|------------------------|
| Inj Vol       | -1                   | InjPosition |        | SampleType      | Sample       | IRM Calibration Status | Success                |
| Data Filename | 2014-1215-ZS-122-2.d | ACQ Method  | 0103.m | Comment         |              | Acquired Time          | 12/15/2014 11:01:22 AM |

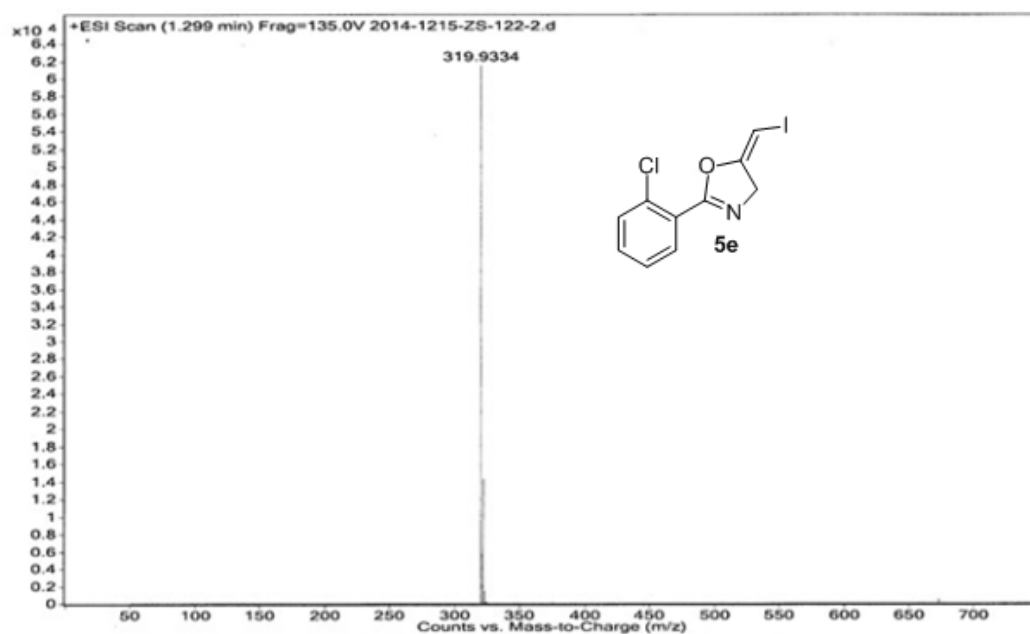

HRMS (ESI, m/z) calcd for C<sub>10</sub>H<sub>7</sub>ClINO [M+H]<sup>+</sup> **319.9334**, found **319.9334**.

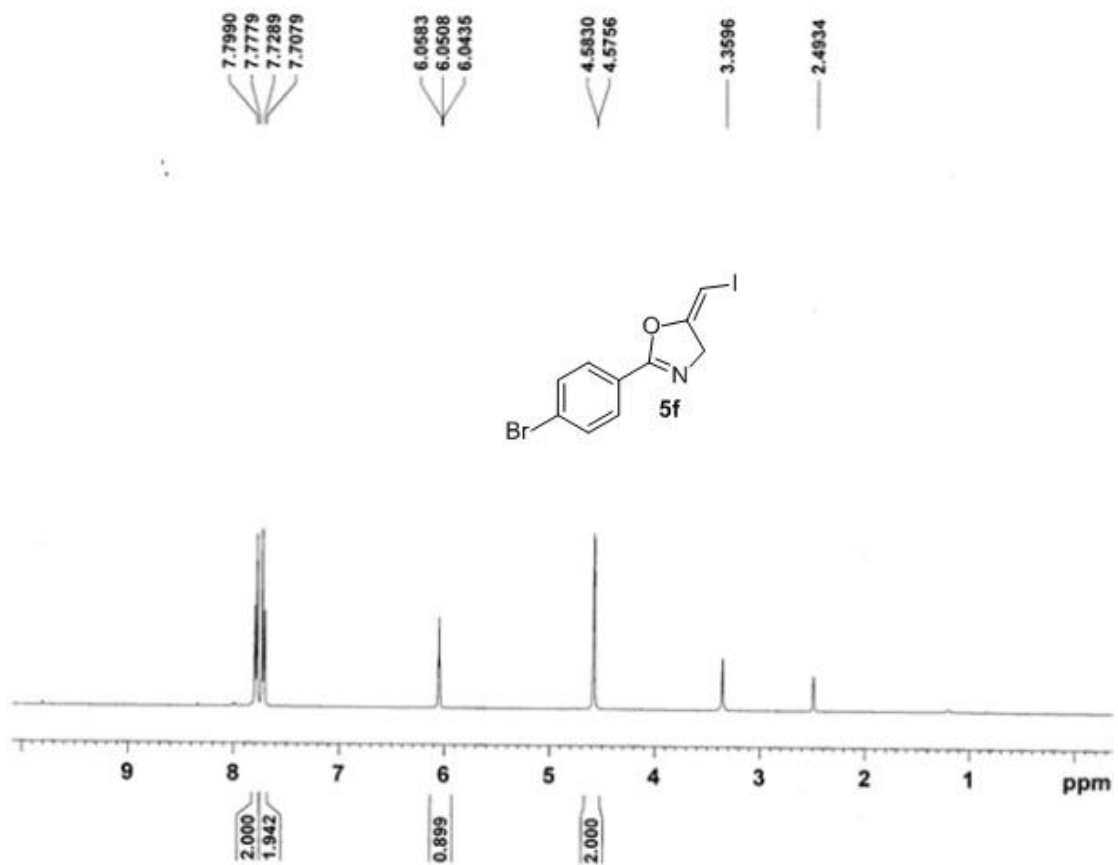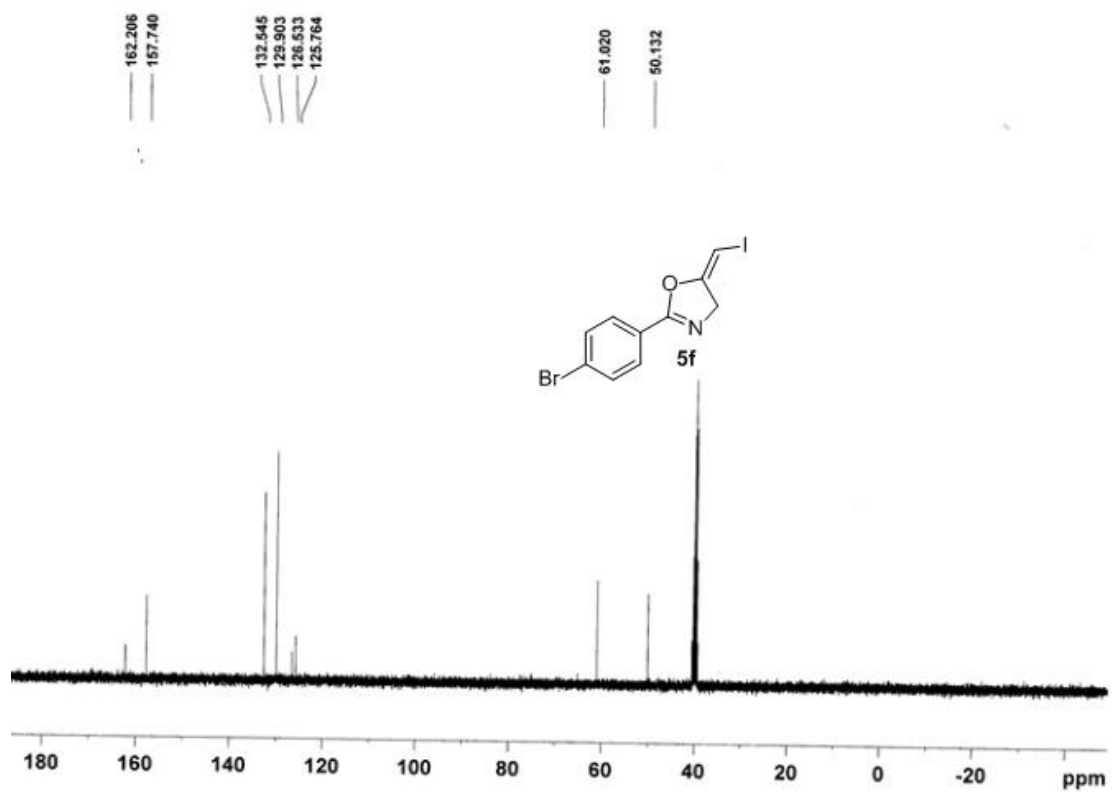

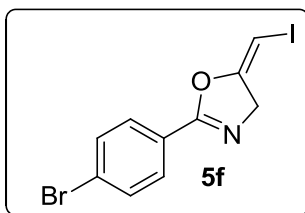

Chemical Formula: C<sub>10</sub>H<sub>7</sub>BrINO

Exact Mass: 362.88

Molecular Weight: 363.98

m/z: 362.88 (100.0%), 364.87 (97.3%), 363.88 (10.9%),  
365.88 (10.7%)

Elemental Analysis: C, 33.00; H, 1.94; Br, 21.95; I, 34.87; N,  
3.85; O, 4.40

| Sample Name   | 20141122-ZS-6   | Position    | P1-F7  | Instrument Name | Instrument 1 | User Name              |                       |
|---------------|-----------------|-------------|--------|-----------------|--------------|------------------------|-----------------------|
| Inj Vol       | -1              | InjPosition |        | SampleType      | Sample       | IRM Calibration Status | Success               |
| Data Filename | 20141122-ZS-6.d | ACQ Method  | 0103.m | Comment         |              | Acquired Time          | 12/5/2014 10:25:29 AM |

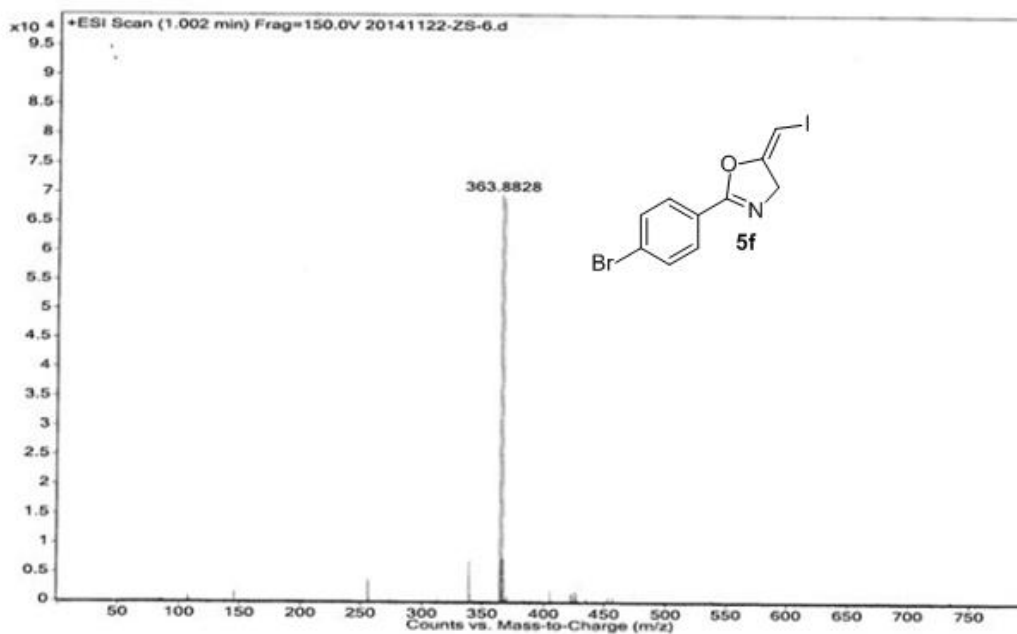

HRMS (ESI, m/z) calcd for C<sub>10</sub>H<sub>7</sub>BrINO [M+H]<sup>+</sup> **363.8828**, found **363.8828**.

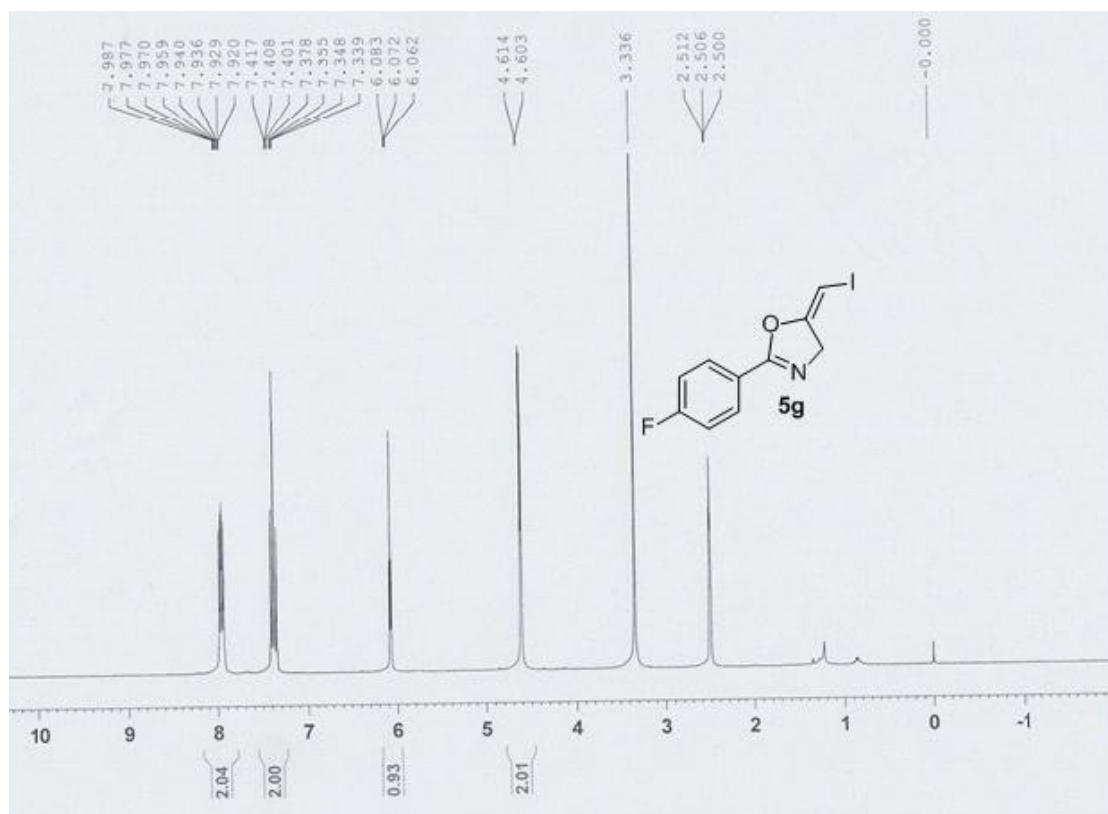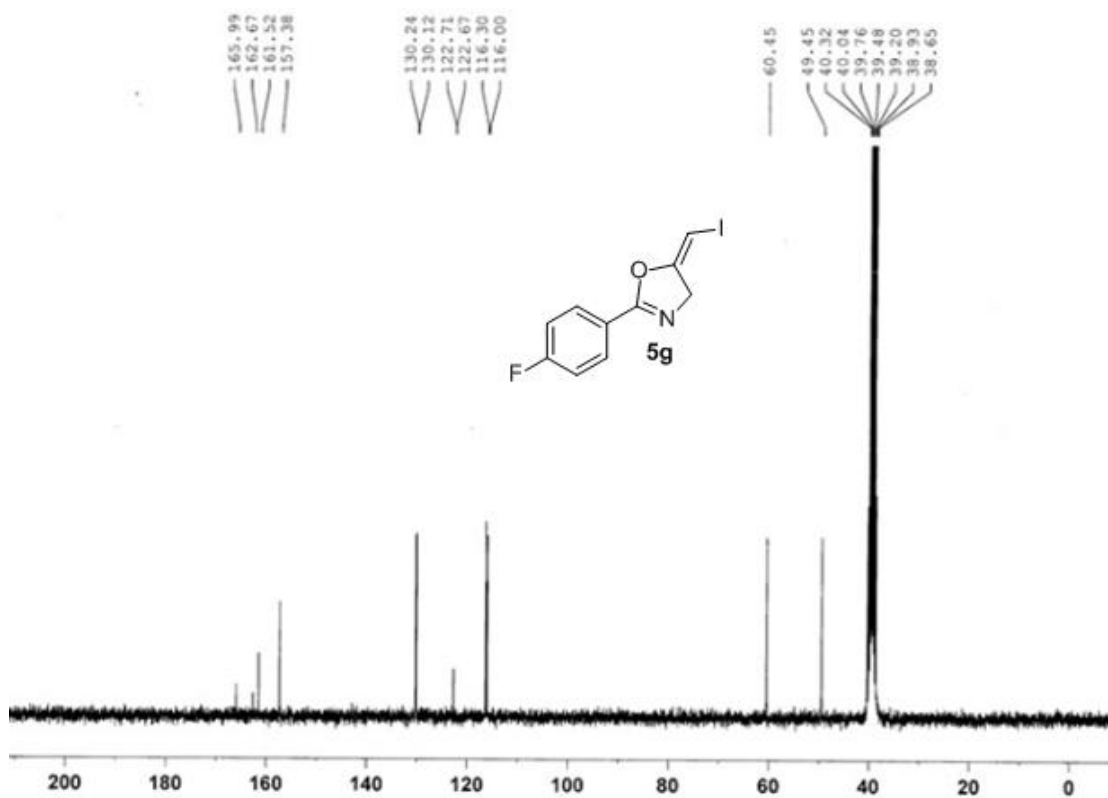

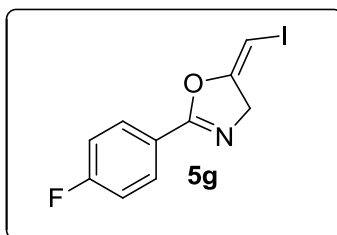

Chemical Formula: C<sub>10</sub>H<sub>7</sub>FINO

Exact Mass: 302.96

Molecular Weight: 303.07

m/z: 302.96 (100.0%), 303.96 (10.9%)

Elemental Analysis: C, 39.63; H, 2.33; F, 6.27; I, 41.87; N, 4.62; O, 5.28

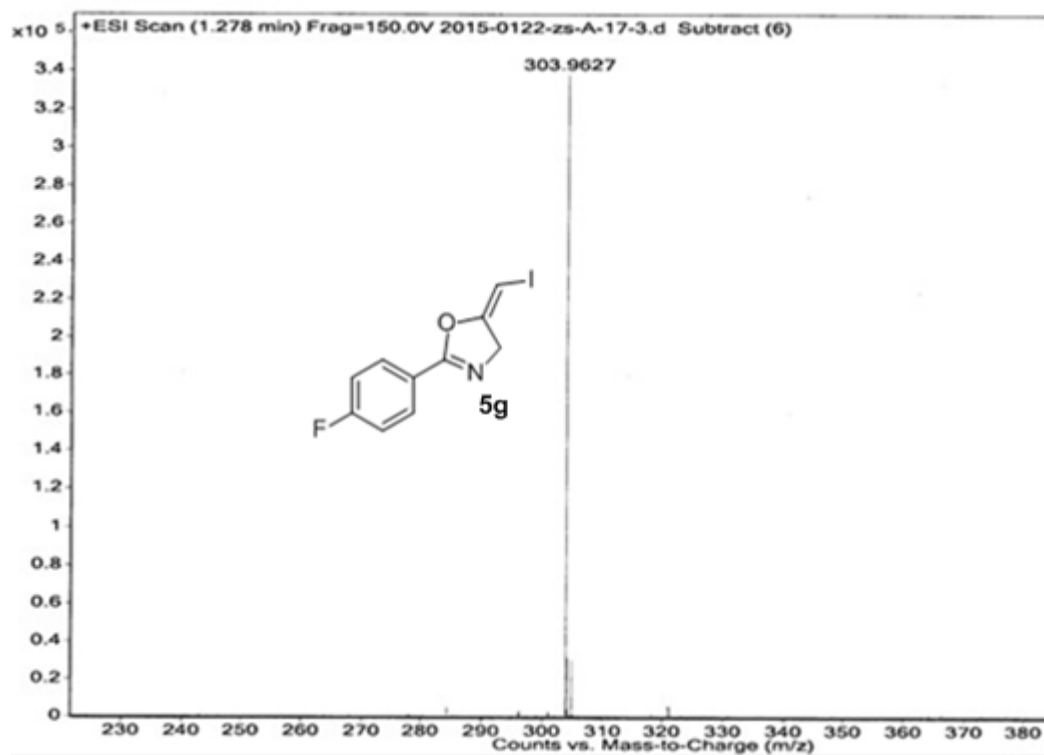

HRMS (ESI, m/z) calcd for C<sub>10</sub>H<sub>7</sub>FINO [M+H]<sup>+</sup> **303.9629**, found **303.9627**.



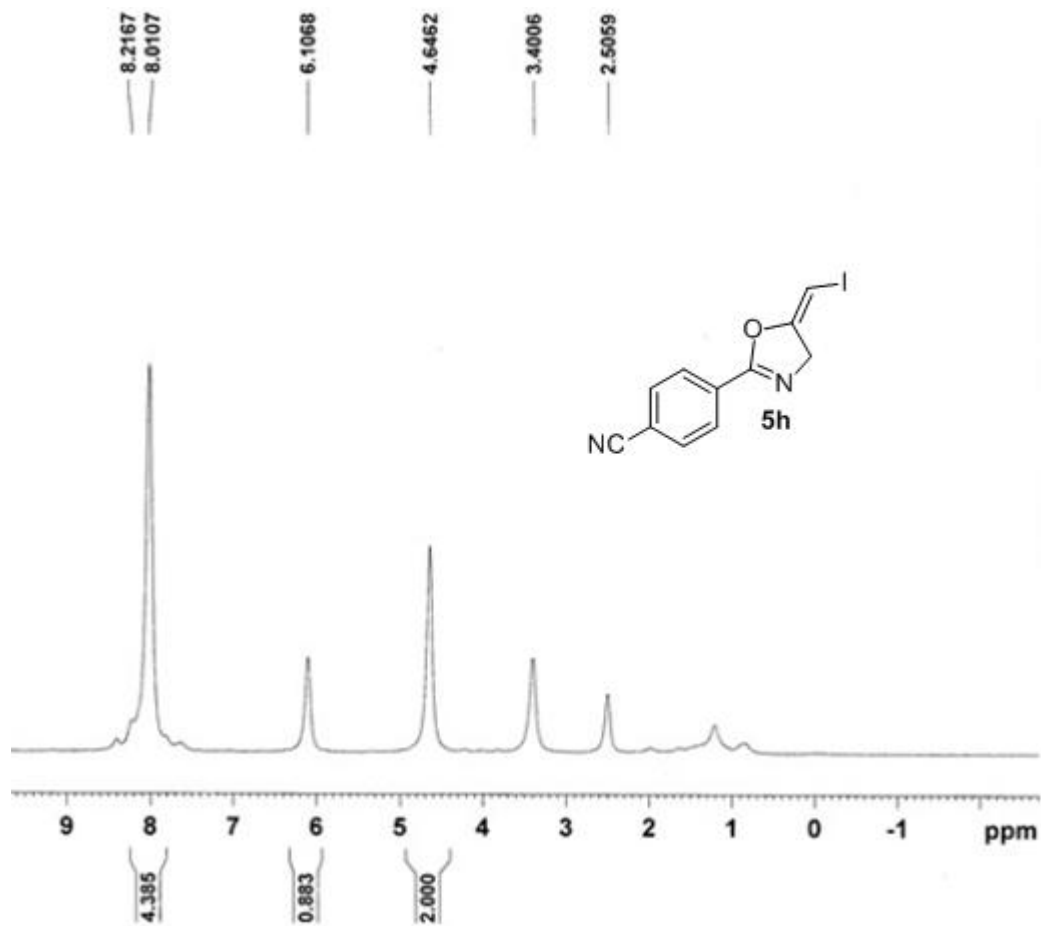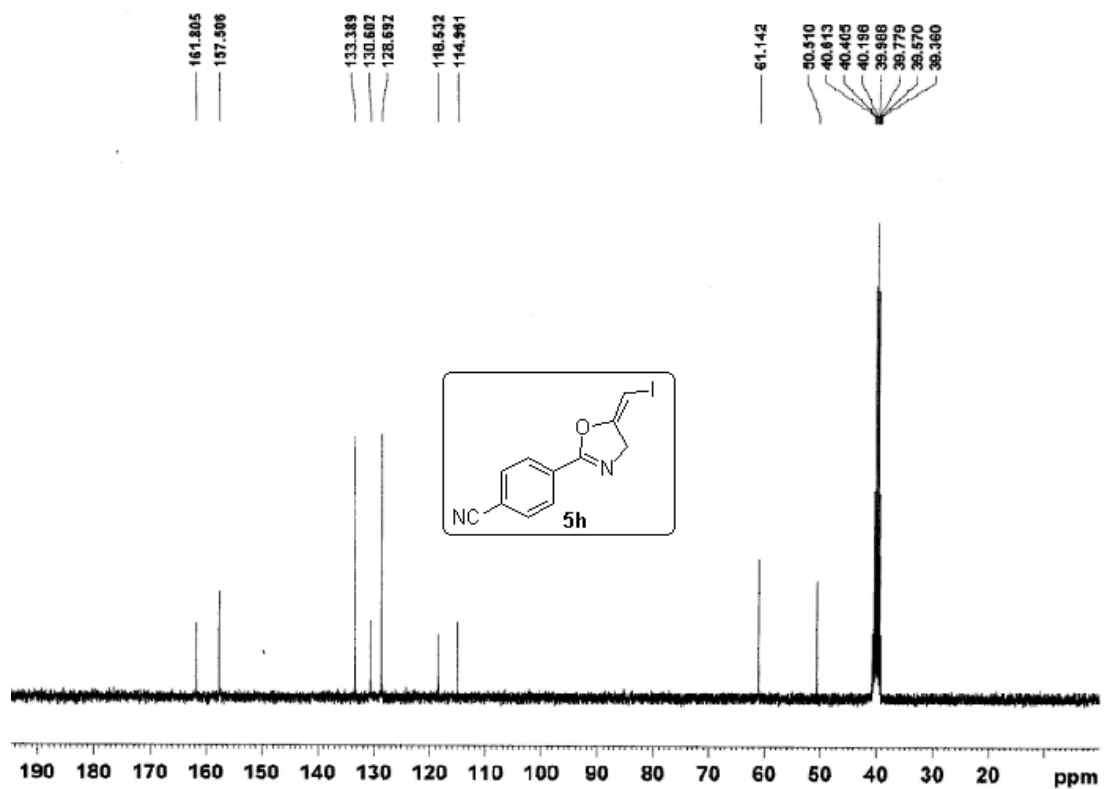

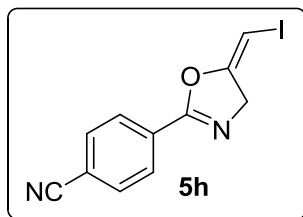

Chemical Formula:  $C_{11}H_7IN_2O$

Exact Mass: 309.96

Molecular Weight: 310.09

m/z: 309.96 (100.0%), 310.96 (12.7%)

Elemental Analysis: C, 42.61; H, 2.28; I, 40.92; N, 9.03; O, 5.16

|               |                   |              |        |                 |              |                        |                        |
|---------------|-------------------|--------------|--------|-----------------|--------------|------------------------|------------------------|
| Sample Name   | 2014-1219-133-4   | Position     | P1-E7  | Instrument Name | Instrument 1 | User Name              |                        |
| Inj Vol       | -1                | Inj Position |        | Sample Type     | Sample       | IRM Calibration Status | Success                |
| Data Filename | 2014-1219-133-4.d | ACQ Method   | 0103.m | Comment         |              | Acquired Time          | 12/19/2014 11:17:22 AM |

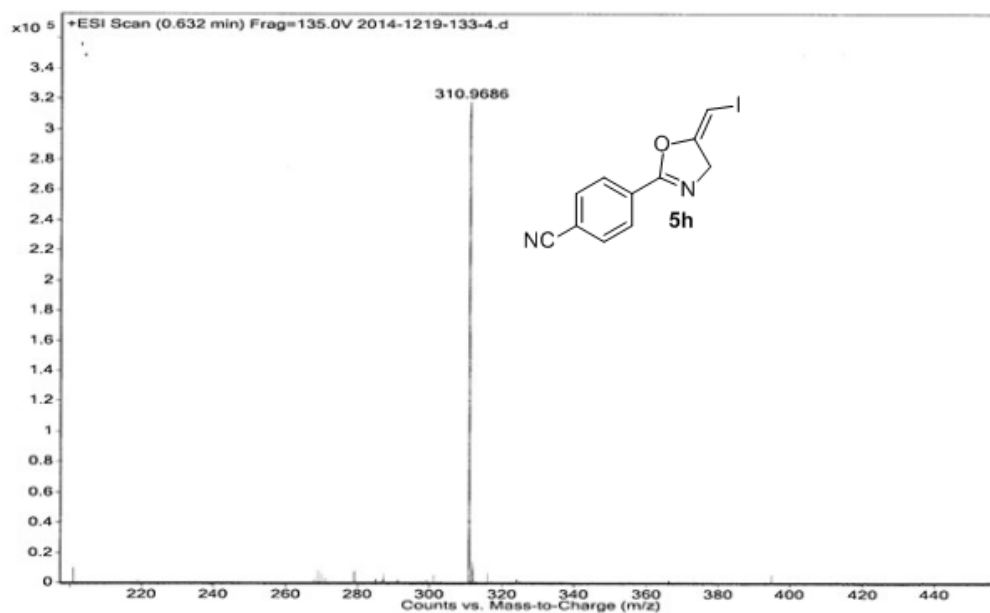

HRMS (ESI, m/z) calcd for  $C_{11}H_7IN_2O$   $[M+H]^+$  **310.9676**, found **310.9686**.

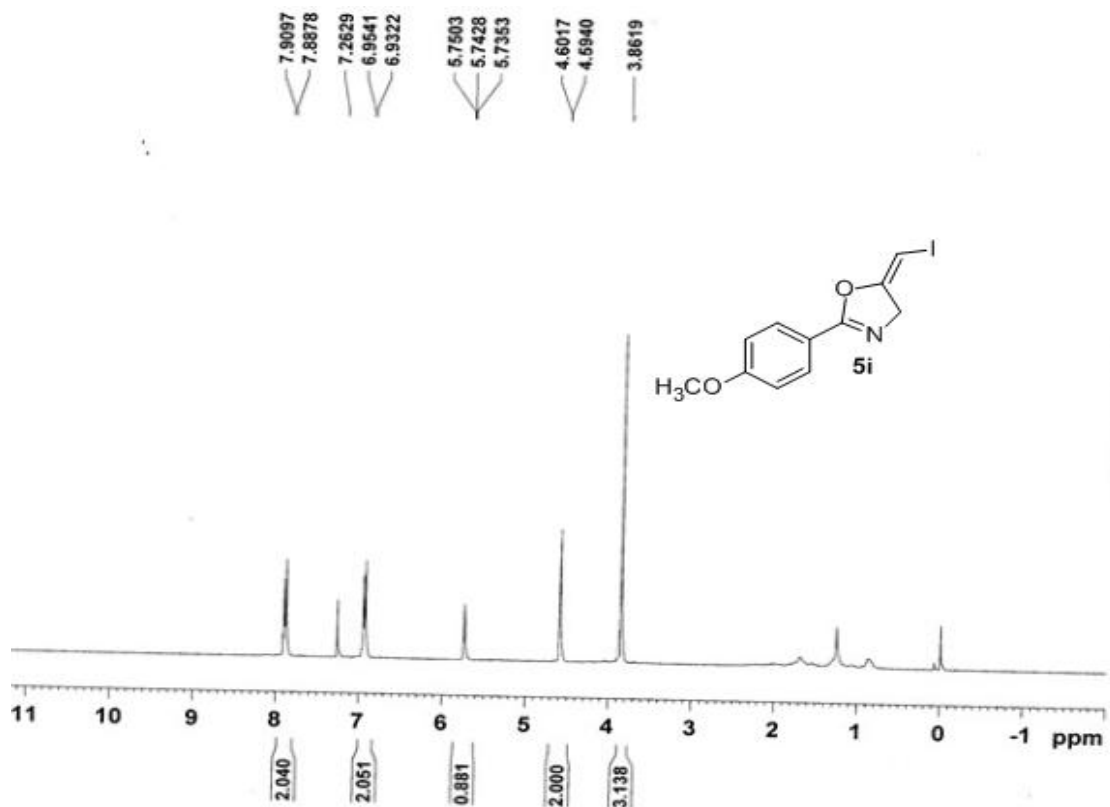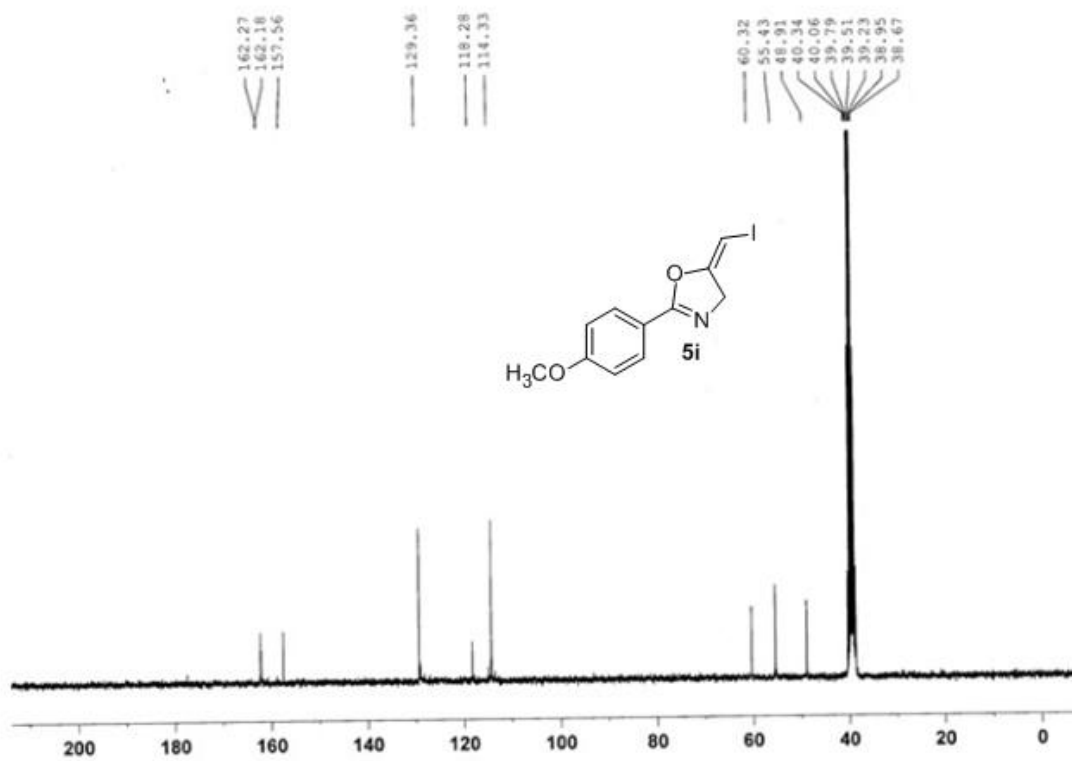

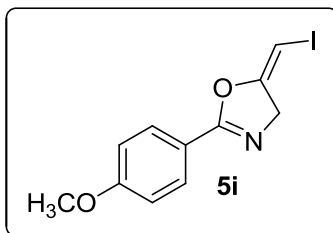

Chemical Formula: C<sub>11</sub>H<sub>10</sub>INO<sub>2</sub>

Exact Mass: 314.98

Molecular Weight: 315.11

m/z: 314.98 (100.0%), 315.98 (12.1%), 316.98 (1.1%)

Elemental Analysis: C, 41.93; H, 3.20; I, 40.27; N, 4.45; O, 10.15

| Sample Name   | 2014-1230-zs   | Position    | P1-C5  | Instrument Name | Instrument 1 | User Name              |                       |
|---------------|----------------|-------------|--------|-----------------|--------------|------------------------|-----------------------|
| Inj Vol       | -1             | InjPosition |        | SampleType      | Sample       | IRM Calibration Status | Success               |
| Data Filename | 2014-1230-zs.d | ACQ Method  | 0103.m | Comment         |              | Acquired Time          | 12/30/2014 9:25:00 AM |

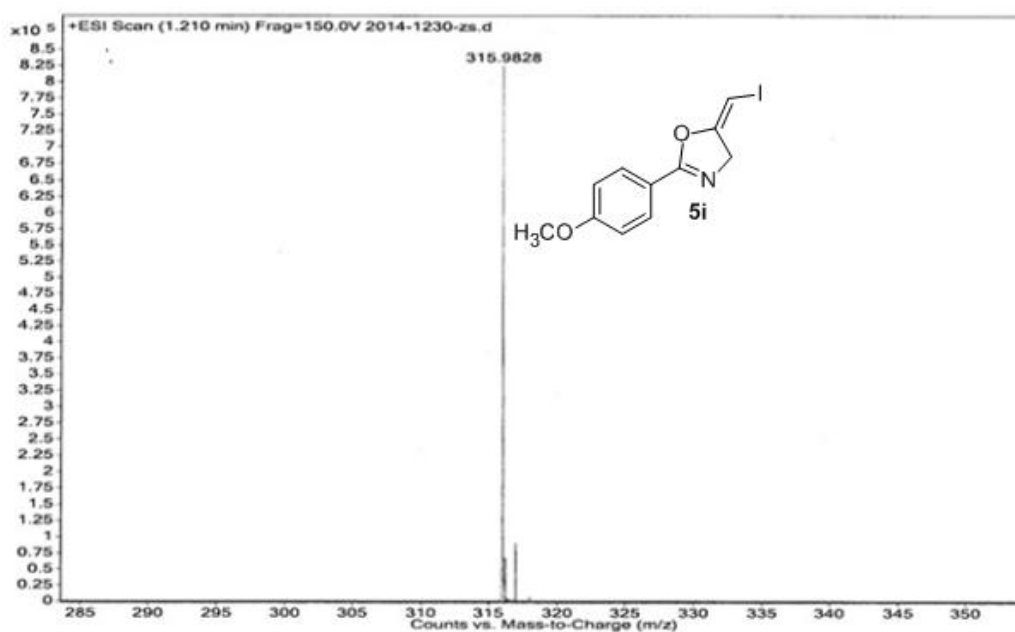

HRMS (ESI, m/z) calcd for C<sub>11</sub>H<sub>10</sub>INO<sub>2</sub> [M+H]<sup>+</sup> **315.9829**, found **315.9828**.

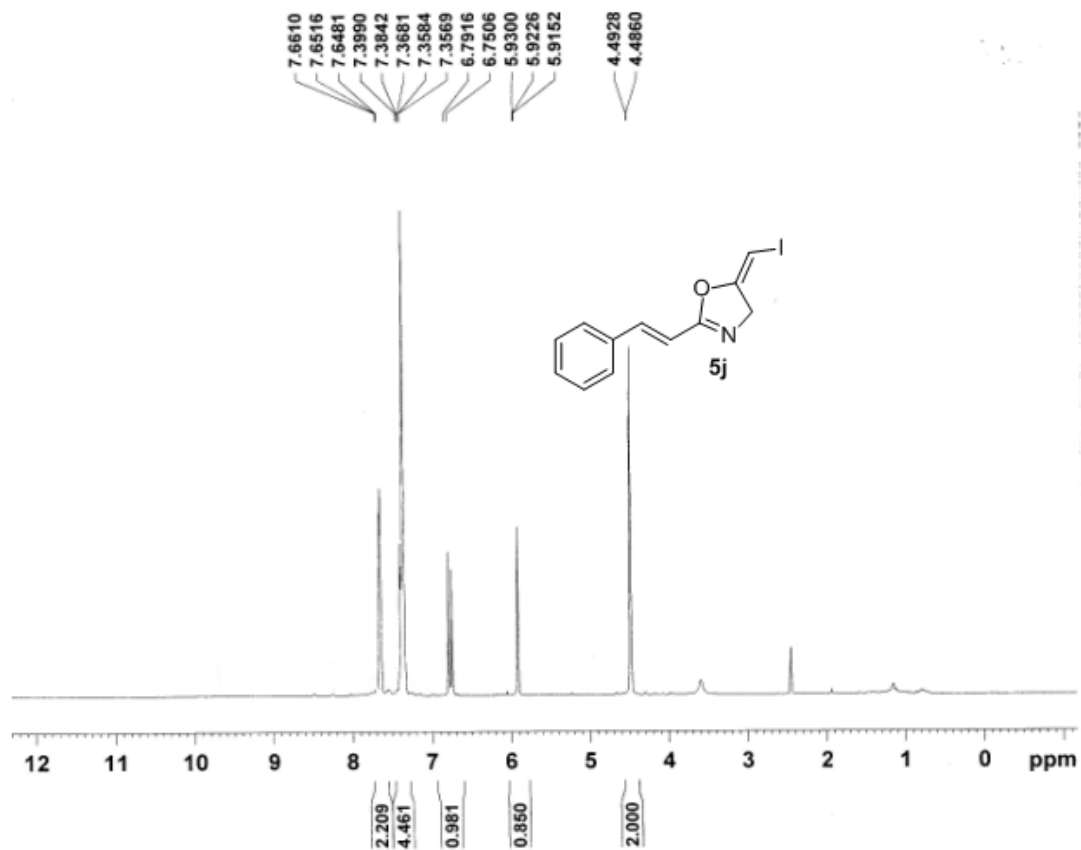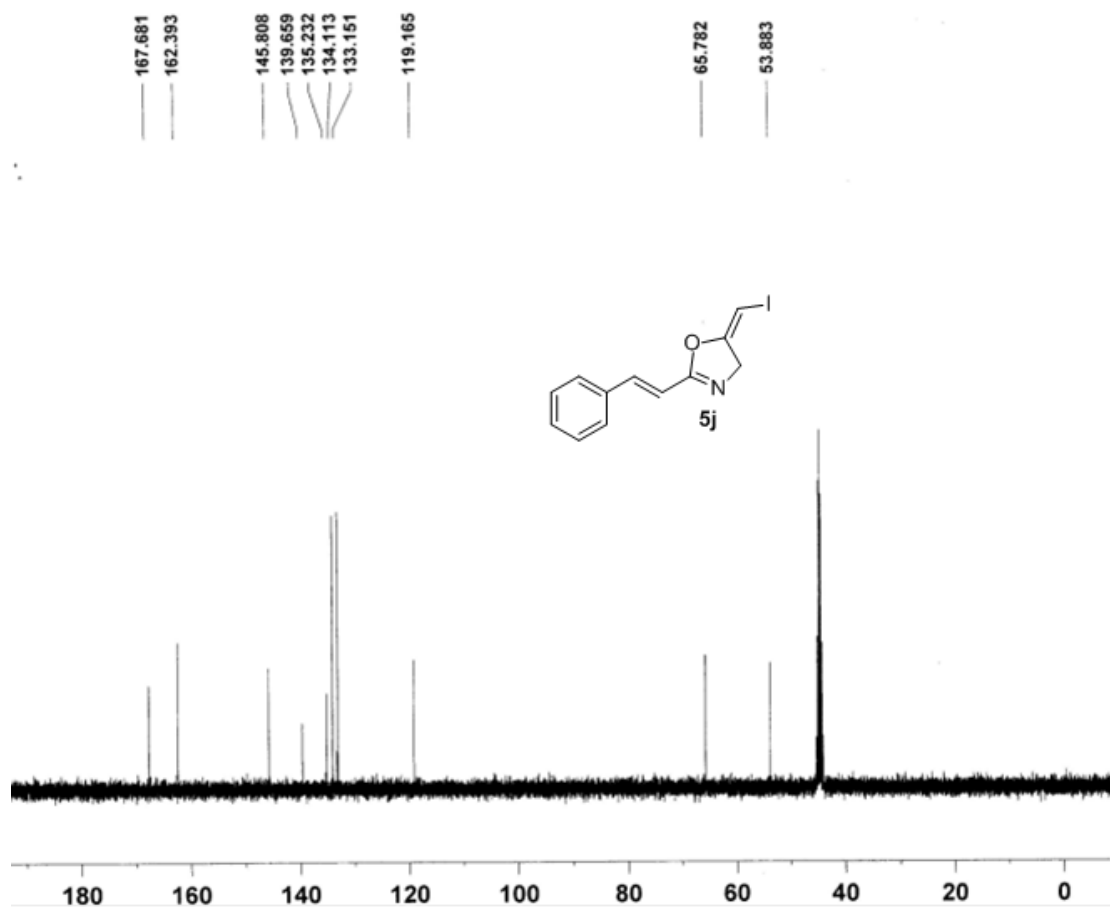

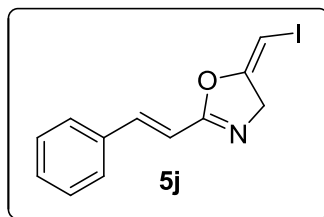

Chemical Formula: C<sub>12</sub>H<sub>10</sub>INO

Exact Mass: 310.98

Molecular Weight: 311.12

m/z: 310.98 (100.0%), 311.98 (13.4%)

Elemental Analysis: C, 46.33; H, 3.24; I, 40.79; N, 4.50; O, 5.14

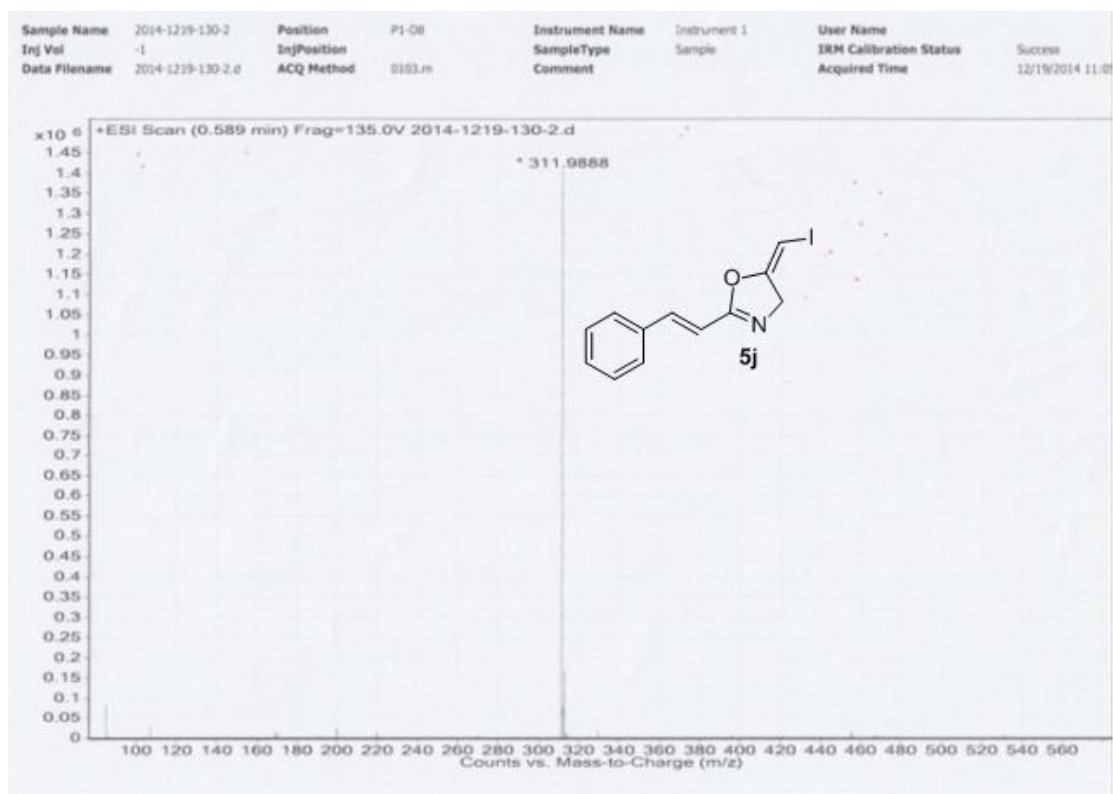

HRMS (ESI, m/z) calcd for C<sub>12</sub>H<sub>10</sub>INO [M+H]<sup>+</sup> **311.9880**, found **311.9888**.

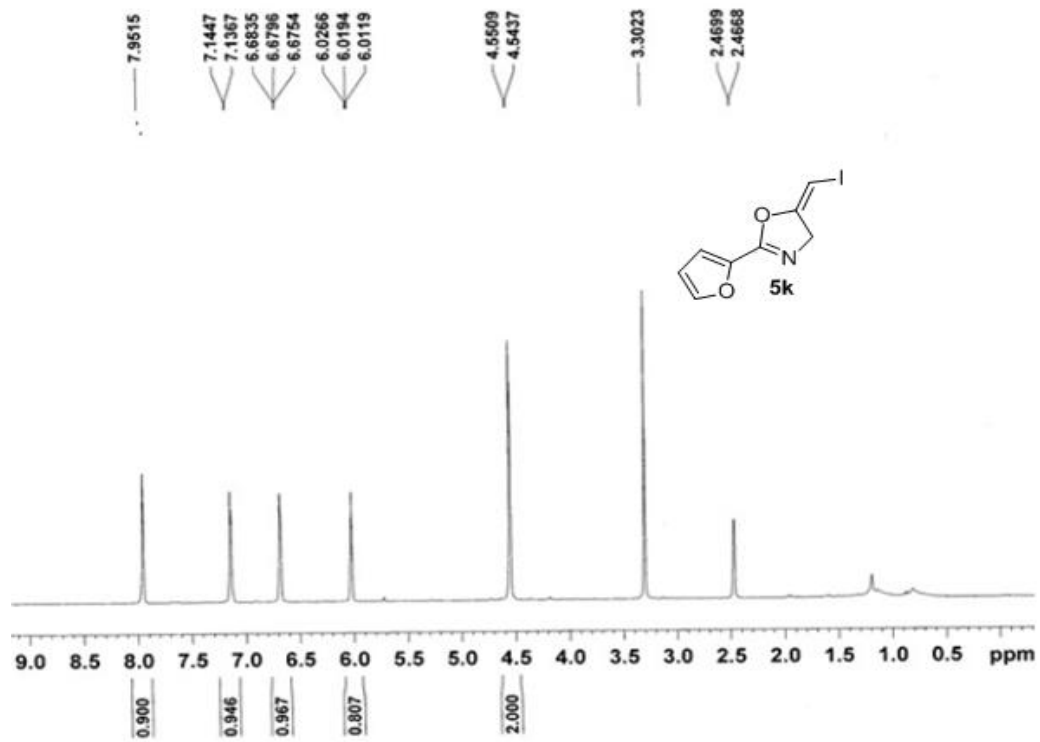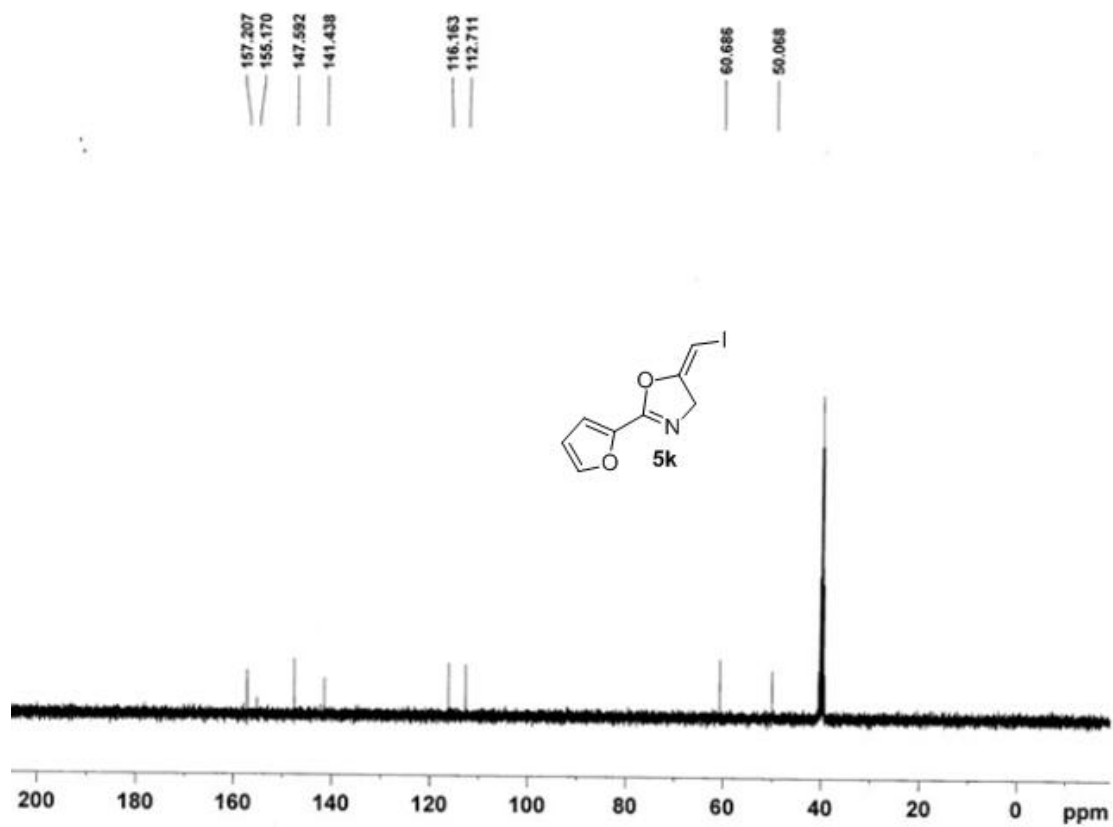

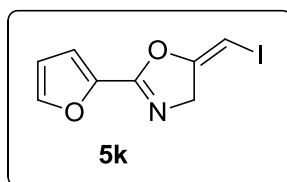

Chemical Formula: C<sub>8</sub>H<sub>6</sub>INO<sub>2</sub>

Exact Mass: 274.9443

Molecular Weight: 275.0432

m/z: 274.9443 (100.0%), 275.9477 (8.7%)

Elemental Analysis: C, 34.93; H, 2.20; I, 46.14; N, 5.09; O, 11.63

| Sample Name   | 20141205-ZS-3-red   | Position    | P1-B8  | Instrument Name | Instrument 1 | User Name              |                       |
|---------------|---------------------|-------------|--------|-----------------|--------------|------------------------|-----------------------|
| Inj Vol       | -1                  | InjPosition |        | SampleType      | Sample       | IRM Calibration Status | Success               |
| Data Filename | 20141205-ZS-3-red.d | ACQ Method  | 0103.m | Comment         |              | Acquired Time          | 12/5/2014 10:20:54 AM |

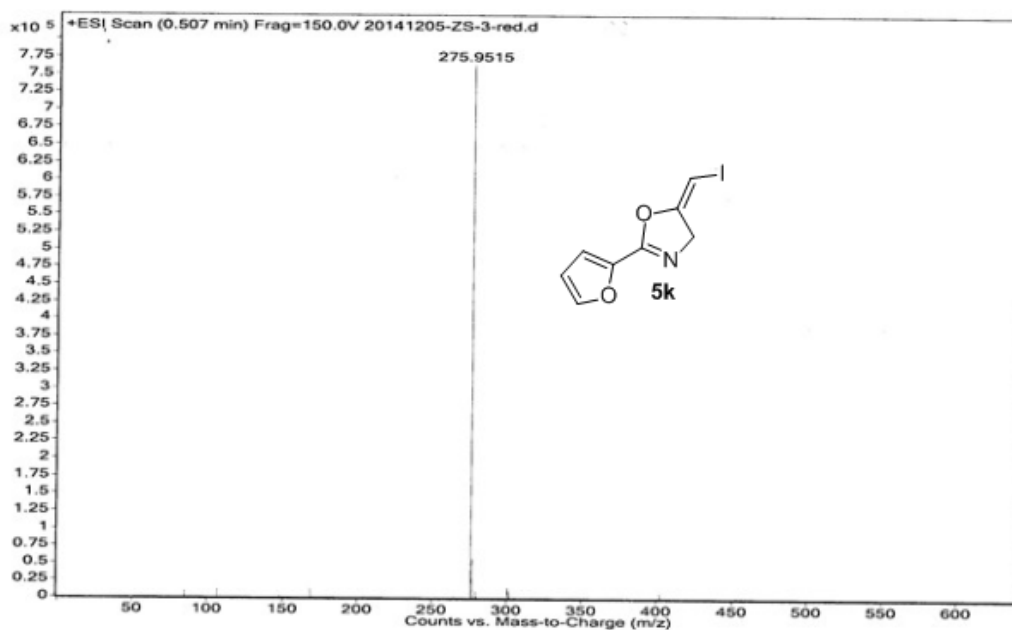

HRMS (ESI, m/z) calcd for C<sub>8</sub>H<sub>6</sub>INO<sub>2</sub> [M+H]<sup>+</sup> **275.9516**, found **275.9515**.



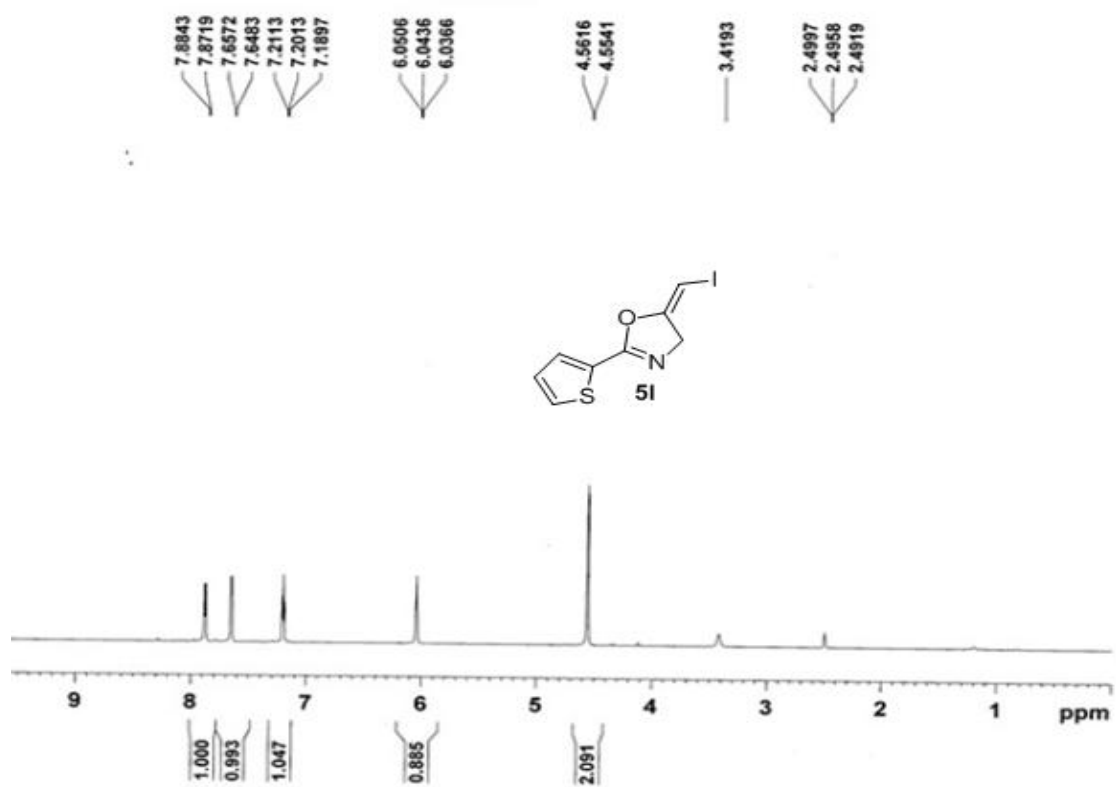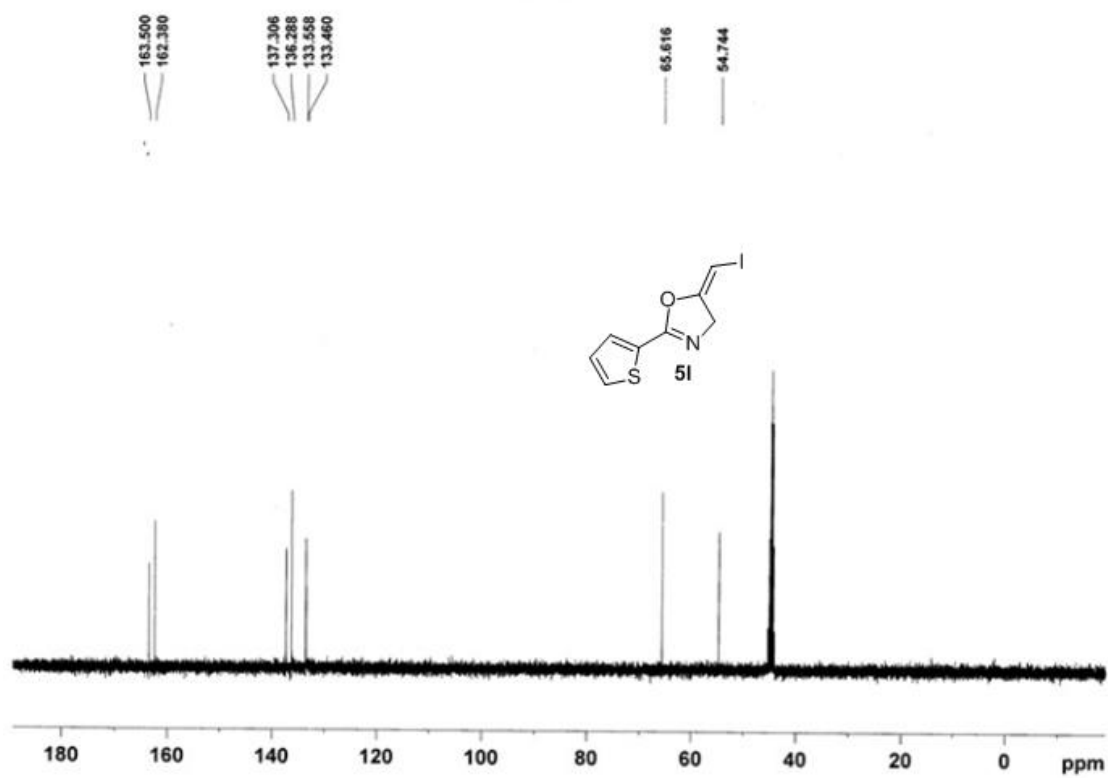

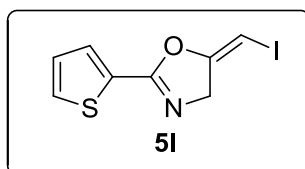

Chemical Formula: C<sub>8</sub>H<sub>6</sub>INOS

Exact Mass: 290.92

Molecular Weight: 291.11

m/z: 290.92 (100.0%), 291.92 (9.8%), 292.92 (4.6%)

Elemental Analysis: C, 33.01; H, 2.08; I, 43.59; N, 4.81; O, 5.50; S, 11.01

| Sample Name   | 20141205-ZS-4   | Position    | F1-A8  | Instrument Name | Instrument 1 | User Name              |                       |
|---------------|-----------------|-------------|--------|-----------------|--------------|------------------------|-----------------------|
| Inj Vol       | -1              | InjPosition |        | SampleType      | Sample       | IRM Calibration Status | Success               |
| Data Filename | 20141205-ZS-4.d | ACQ Method  | 0103.m | Comment         |              | Acquired Time          | 12/5/2014 10:23:12 AM |

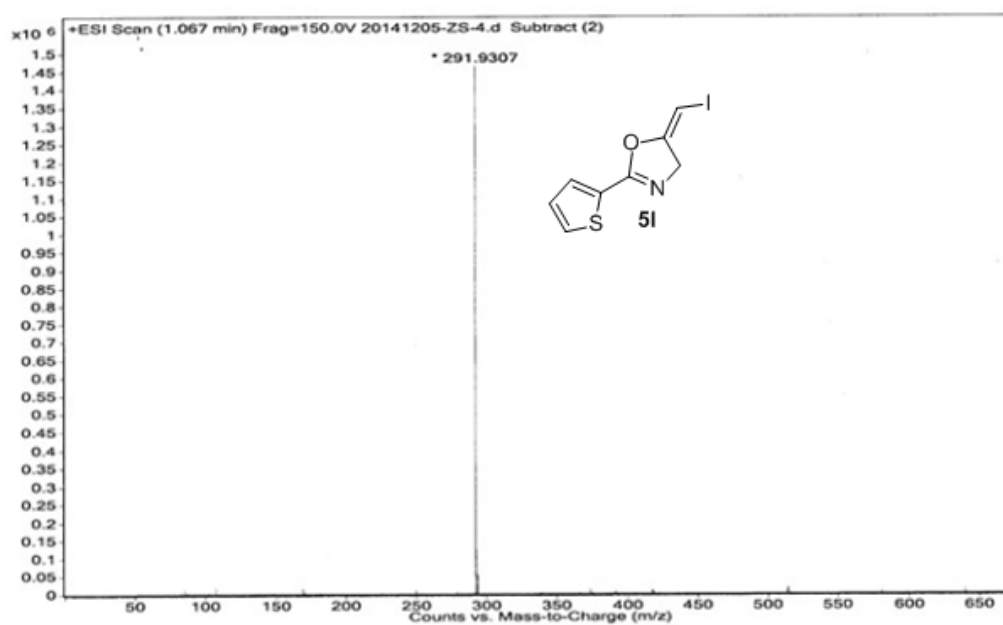

HRMS (ESI, m/z) calcd for C<sub>8</sub>H<sub>6</sub>INOS [M+H]<sup>+</sup> **291.9288**, found **291.9307**.

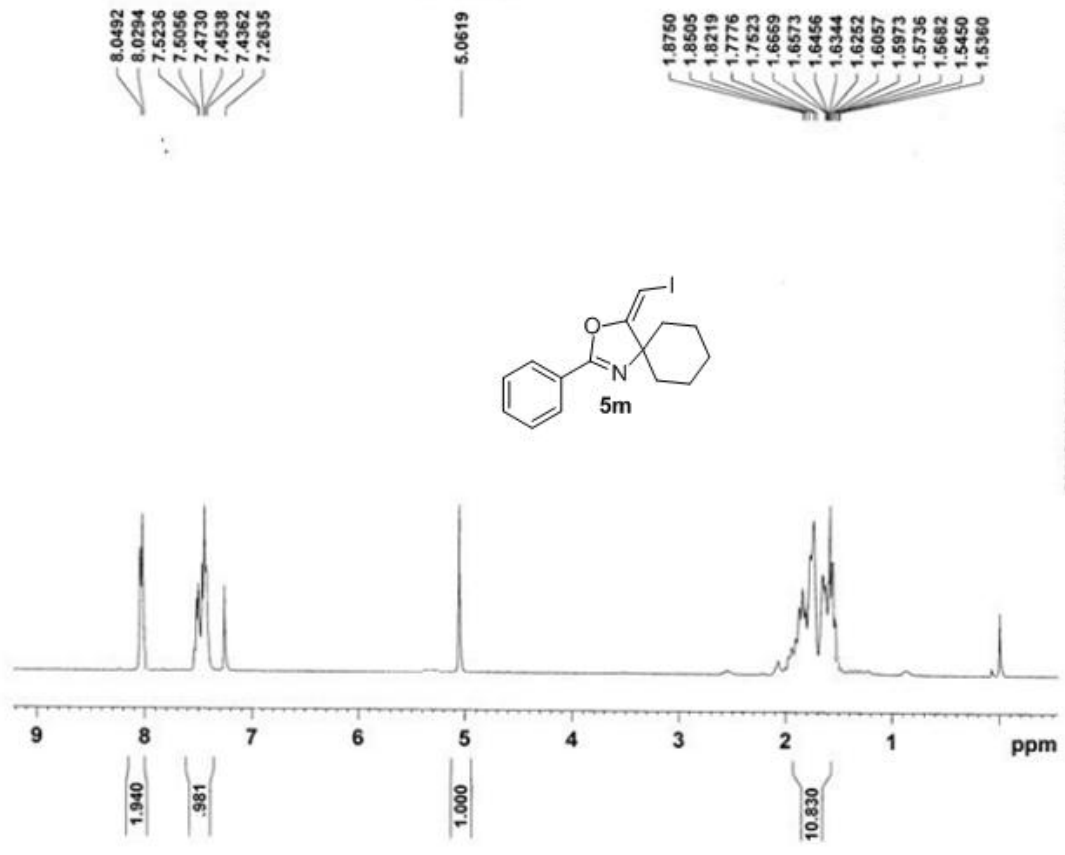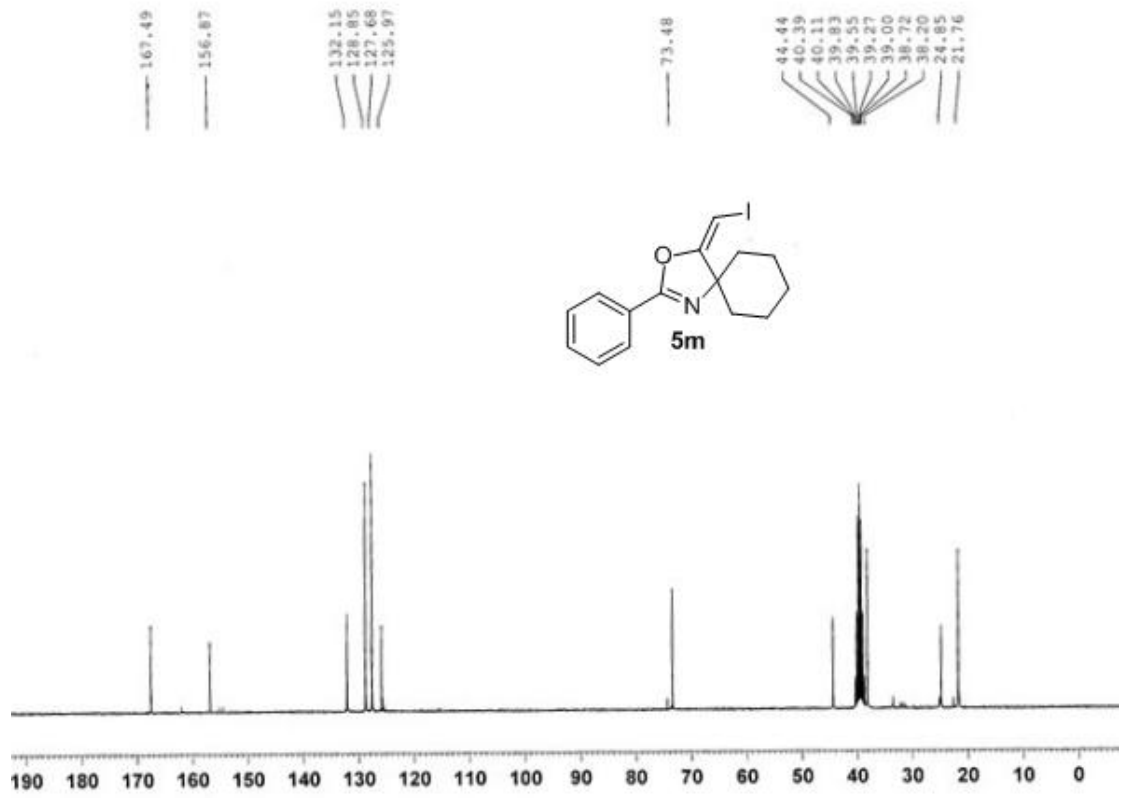

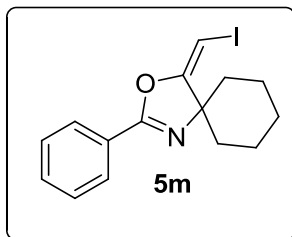

Chemical Formula: C<sub>15</sub>H<sub>16</sub>INO

Exact Mass: 353.03

Molecular Weight: 353.20

m/z: 353.03 (100.0%), 354.03 (16.4%), 355.03 (1.5%)

Elemental Analysis: C, 51.01; H, 4.57; I, 35.93; N, 3.97; O, 4.53

|               |                     |             |        |                 |              |                        |                        |
|---------------|---------------------|-------------|--------|-----------------|--------------|------------------------|------------------------|
| Sample Name   | 2014-1229-ZS-138-1H | Position    | P1-C9  | Instrument Name | Instrument 1 | User Name              |                        |
| Inj Vol       | -1                  | InjPosition |        | SampleType      | Sample       | IRM Calibration Status | Success                |
| Data Filename | 2014-1229-ZS-138-1H | ACQ Method  | 0103.m | Comment         |              | Acquired Time          | 12/29/2014 10:28:35 AM |

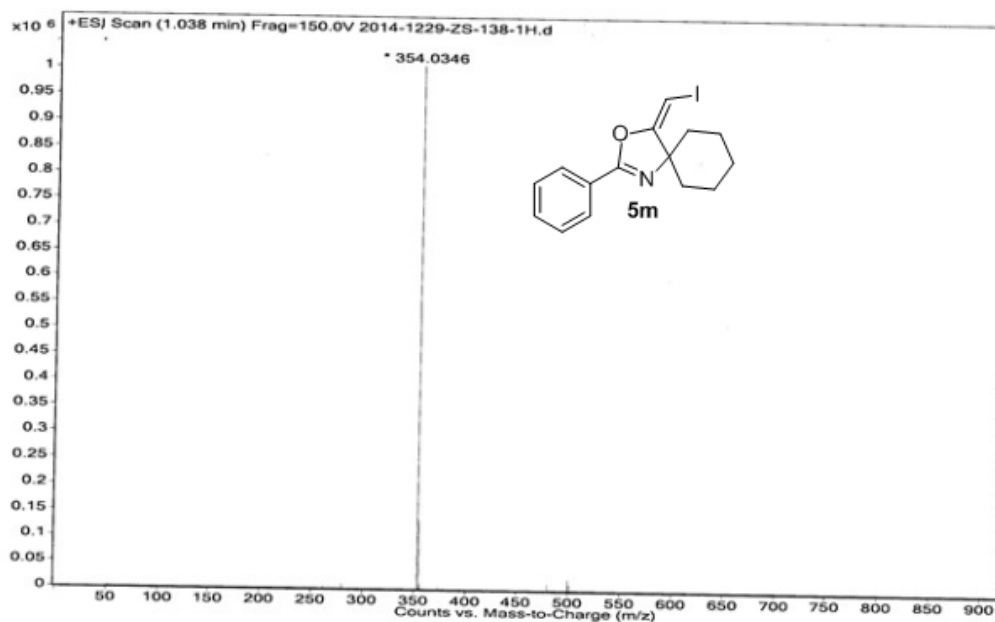

HRMS (ESI, m/z) calcd for C<sub>15</sub>H<sub>16</sub>INO [M+H]<sup>+</sup> **354.0349**, found **354.0346**.

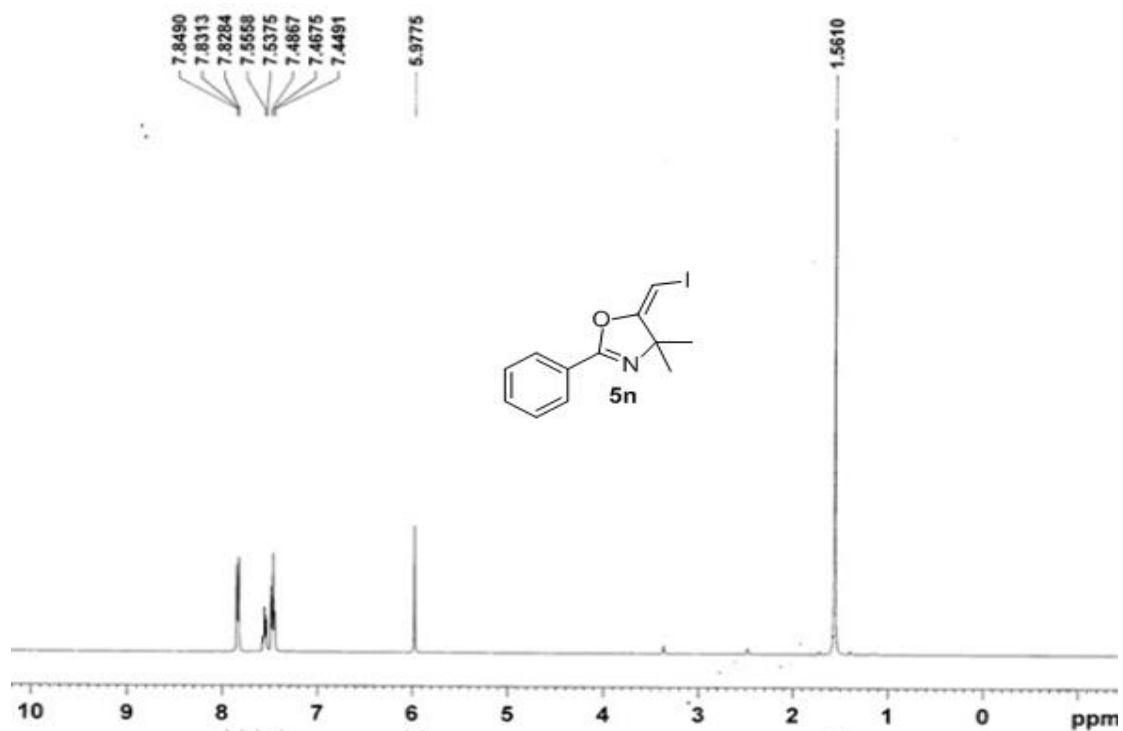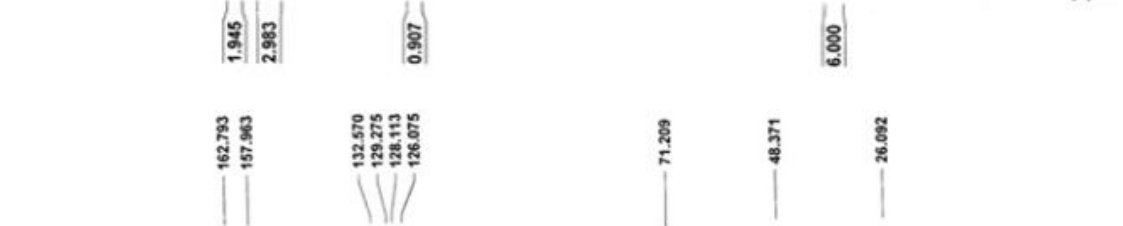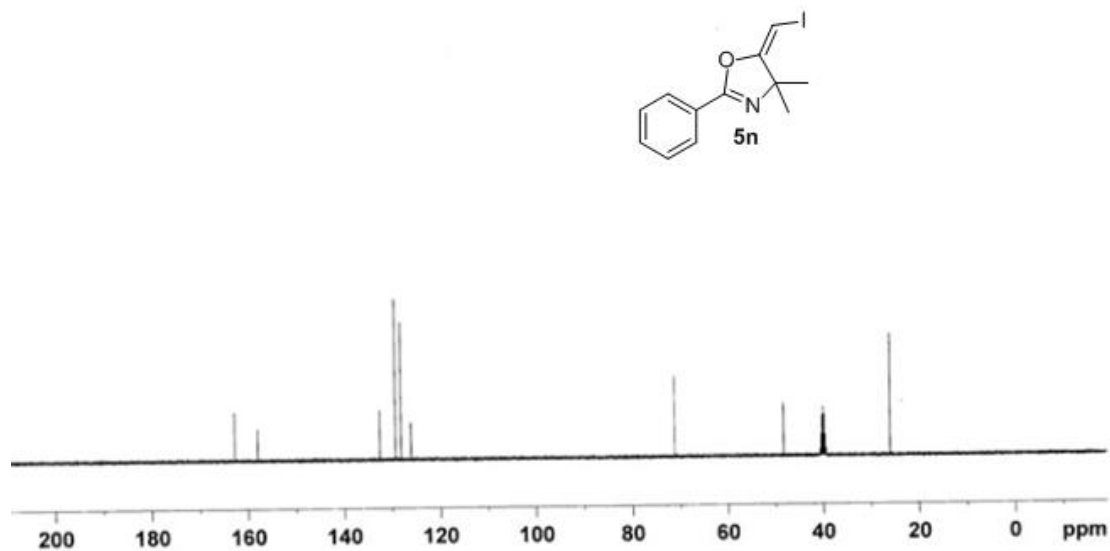

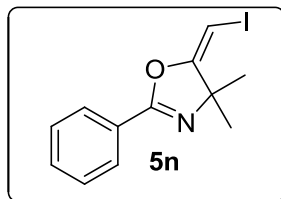

Chemical Formula: C<sub>12</sub>H<sub>12</sub>INO

Exact Mass: 313.00

Molecular Weight: 313.13

m/z: 313.00 (100.0%), 314.00 (13.2%), 315.00 (1.0%)

Elemental Analysis: C, 46.03; H, 3.86; I, 40.53; N, 4.47; O, 5.11

| Sample Name   | 2014-1229-ZS-150-4   | Position    | P1-A9  | Instrument Name | Instrument 1 | User Name              |                        |
|---------------|----------------------|-------------|--------|-----------------|--------------|------------------------|------------------------|
| Inj Vol       | -1                   | InjPosition |        | SampleType      | Sample       | IRM Calibration Status | Success                |
| Data Filename | 2014-1229-ZS-150-4.d | ACQ Method  | 0103.m | Comment         |              | Acquired Time          | 12/29/2014 10:33:01 AM |

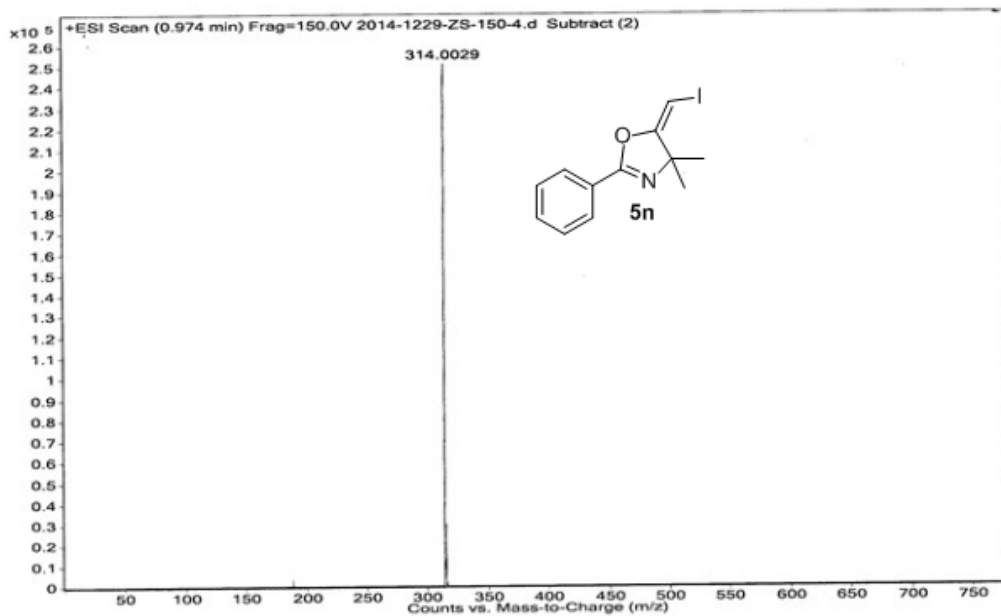

HRMS (ESI, m/z) calcd for C<sub>12</sub>H<sub>12</sub>INO [M+H]<sup>+</sup> **314.0036**, found **314.0029**.

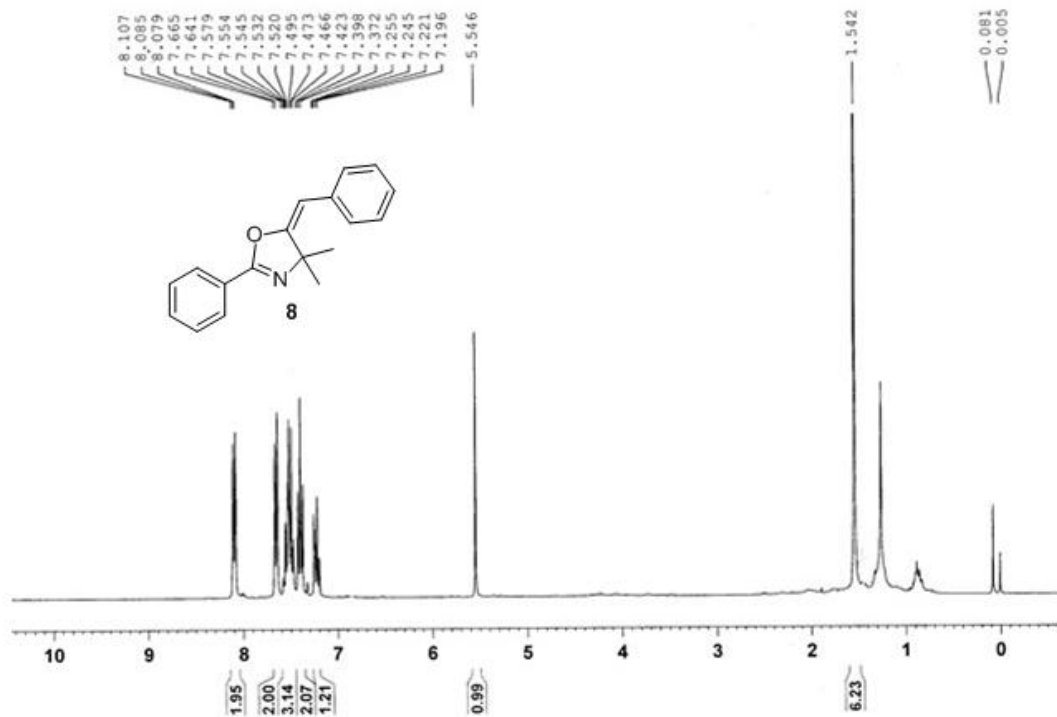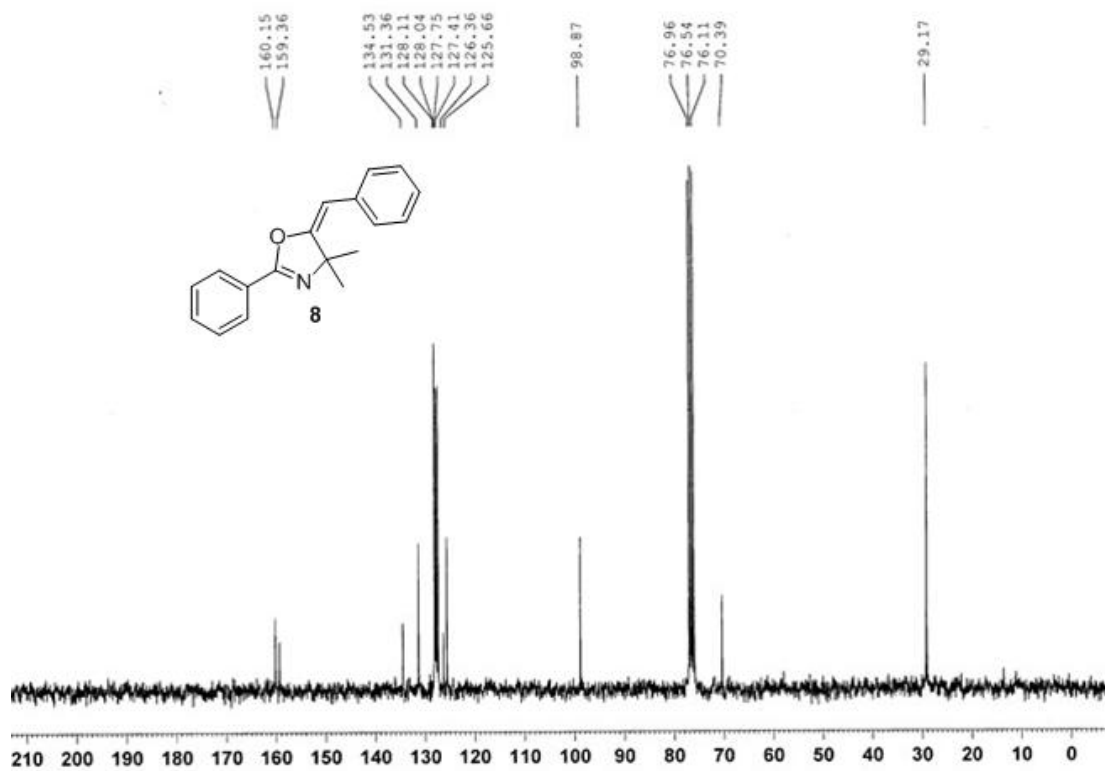

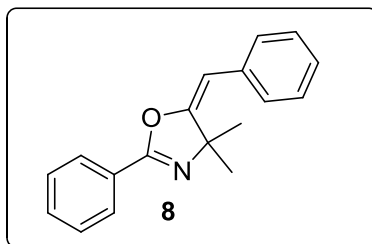

Chemical Formula: C<sub>18</sub>H<sub>17</sub>NO

Exact Mass: 263.1310

Molecular Weight: 263.3337

m/z: 263.1310 (100.0%), 264.1344 (19.5%), 265.1377 (1.8%)

Elemental Analysis: C, 82.10; H, 6.51; N, 5.32; O, 6.08

| Sample Name   | 2015-0105-ZS-159-2   | Position    | P1-A9  | Instrument Name | Instrument 1 | User Name              |                      |
|---------------|----------------------|-------------|--------|-----------------|--------------|------------------------|----------------------|
| Inj Vol       | -1                   | InjPosition |        | SampleType      | Sample       | IRM Calibration Status | Success              |
| Data Filename | 2015-0105-ZS-159-2.d | ACQ Method  | 0103.m | Comment         |              | Acquired Time          | 1/5/2015 10:43:18 AM |

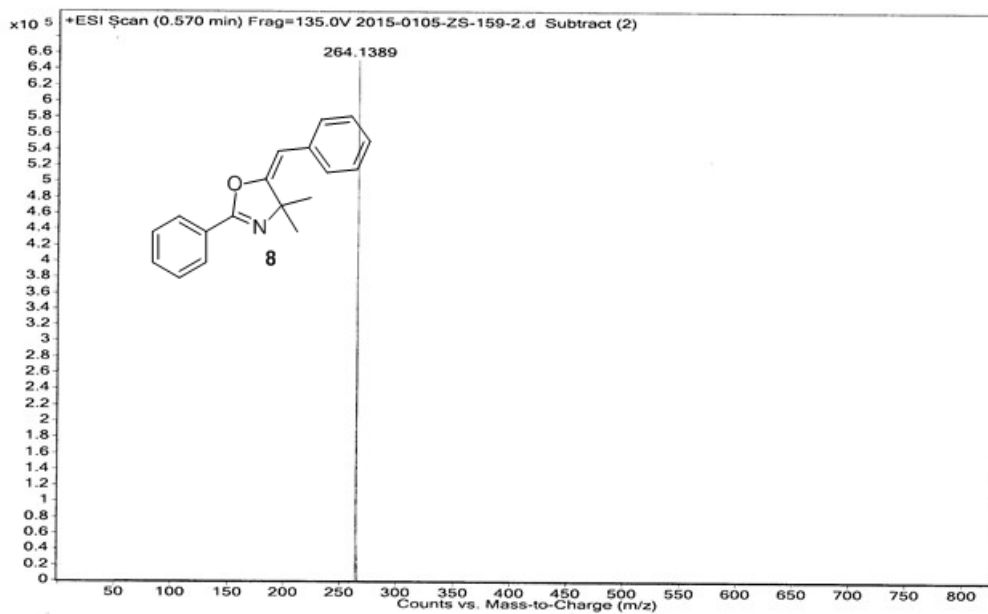

HRMS (ESI, m/z) calcd for C<sub>18</sub>H<sub>17</sub>NO [M+H]<sup>+</sup> **264.1383**, found **264.1389**.



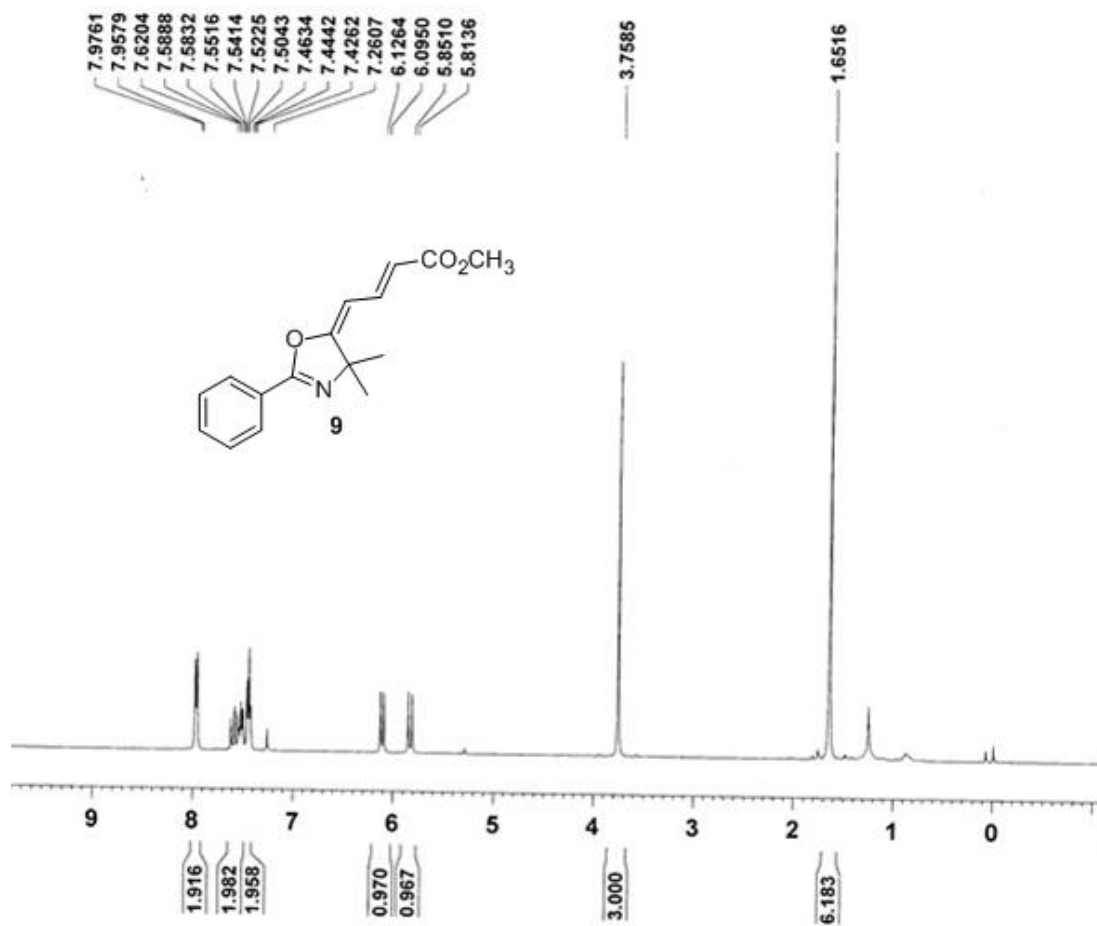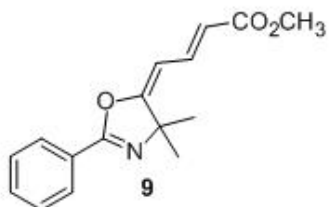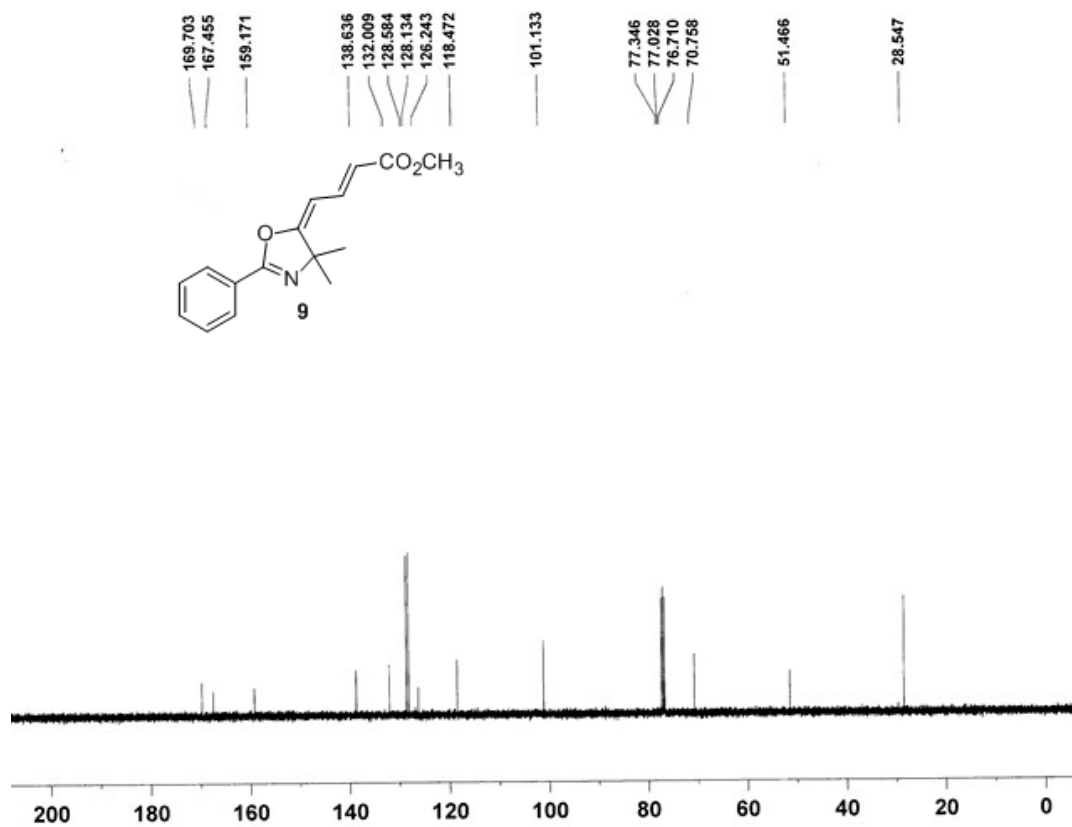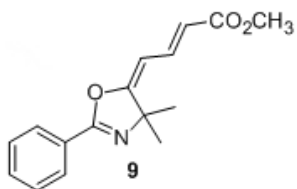

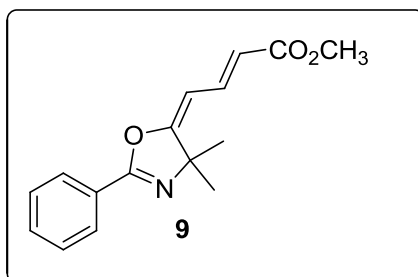

Chemical Formula: C<sub>16</sub>H<sub>17</sub>NO<sub>3</sub>

Exact Mass: 271.1208

Molecular Weight: 271.3111

m/z: 271.1208 (100.0%), 272.1242 (17.3%), 273.1276 (1.4%)

Elemental Analysis: C, 70.83; H, 6.32; N, 5.16; O, 17.69

| Sample Name   | 2015-0105-ZS-166-2   | Position    | P1-C9  | Instrument Name | Instrument 1 | User Name              |                      |
|---------------|----------------------|-------------|--------|-----------------|--------------|------------------------|----------------------|
| Inj Vol       | -1                   | InjPosition |        | SampleType      | Sample       | IRM Calibration Status | Success              |
| Data Filename | 2015-0105-ZS-166-2.d | ACQ Method  | 0103.m | Comment         |              | Acquired Time          | 1/5/2015 10:38:48 AM |

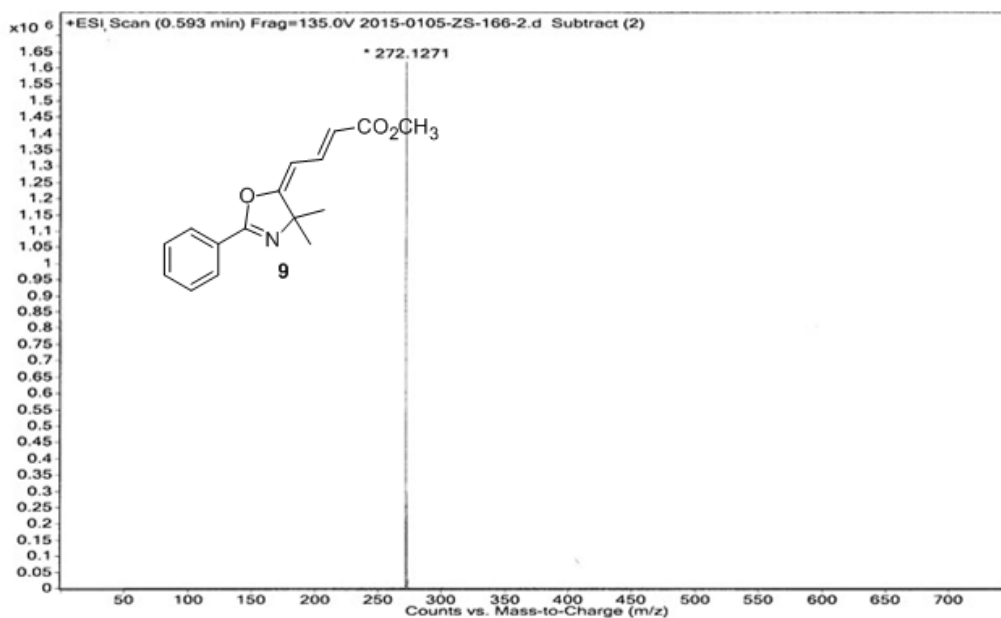

HRMS (ESI, m/z) calcd for C<sub>16</sub>H<sub>17</sub>NO<sub>3</sub> [M+H]<sup>+</sup> **272.1281**, found **264.1271**.

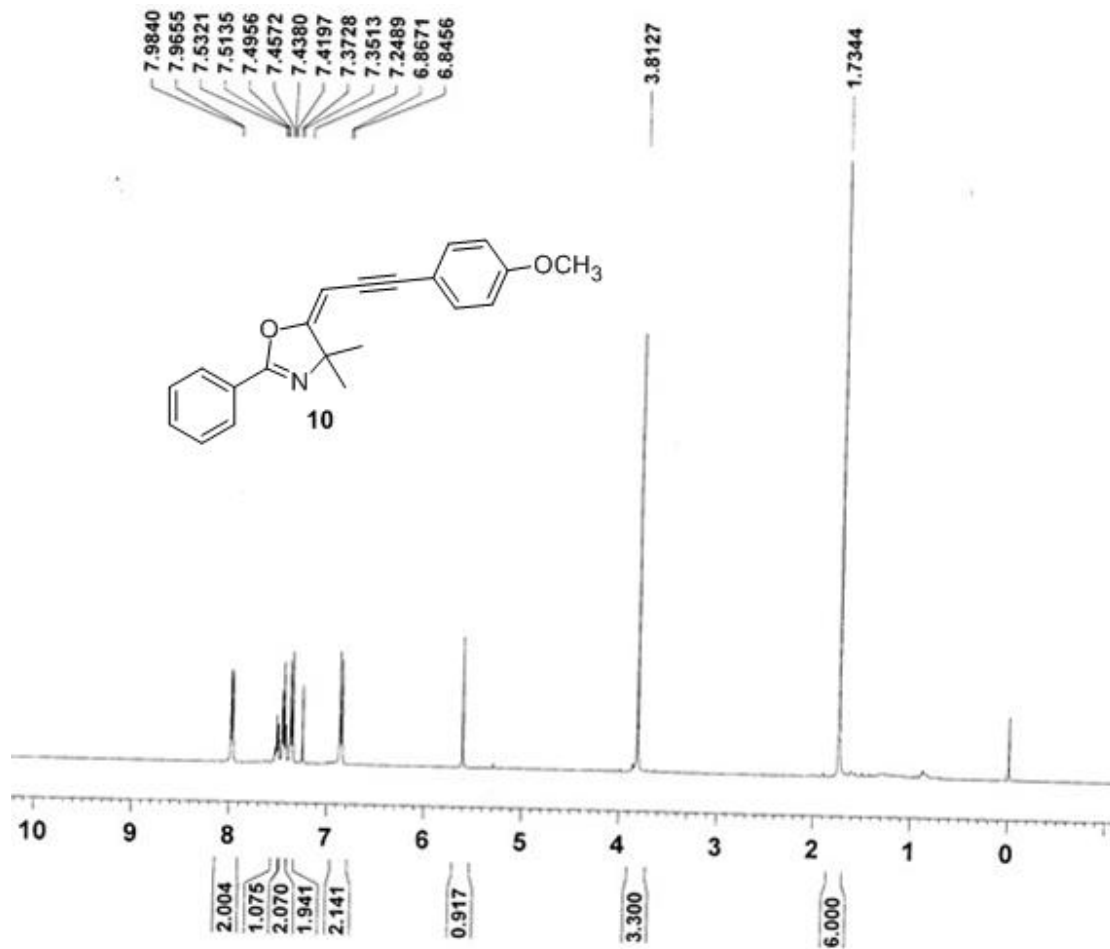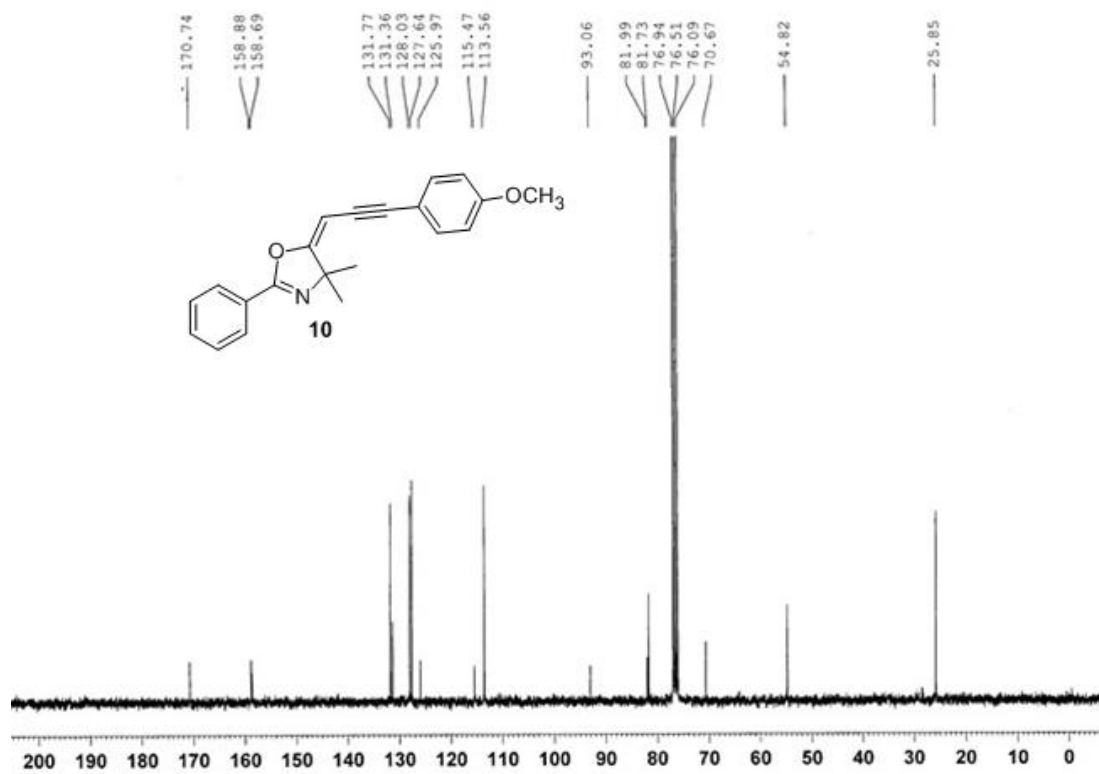

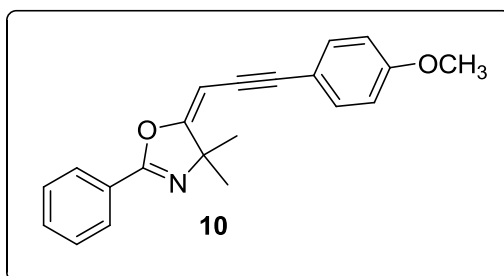

Chemical Formula: C<sub>21</sub>H<sub>19</sub>NO<sub>2</sub>

Exact Mass: 317.1416

Molecular Weight: 317.3811

m/z: 317.1416 (100.0%), 318.1449 (22.7%), 319.1483 (2.5%)

Elemental Analysis: C, 79.47; H, 6.03; N, 4.41; O, 10.08

|               |                   |             |             |                 |                                   |                        |             |
|---------------|-------------------|-------------|-------------|-----------------|-----------------------------------|------------------------|-------------|
| Sample Name   | Unavailable       | Position    | Unavailable | Instrument Name | Unavailable                       | User Name              | Unavailable |
| Inj Vol       | Unavailable       | InjPosition | Unavailable | SampleType      | Unavailable                       | IRM Calibration Status | Success     |
| Data Filename | 150109-ZS-172-2.d | ACQ Method  |             | Comment         | Sample information is unavailable | Acquired Time          | Unavailable |

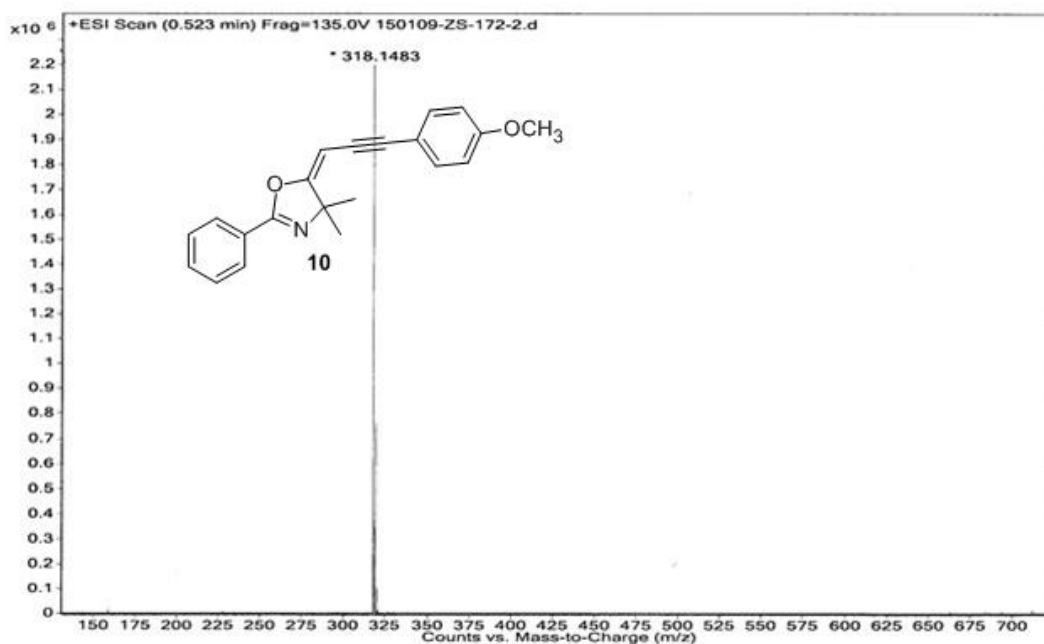

HRMS (ESI, m/z) calcd for C<sub>21</sub>H<sub>19</sub>NO<sub>2</sub> [M+H]<sup>+</sup> **318.1489**, found **318.1483**.

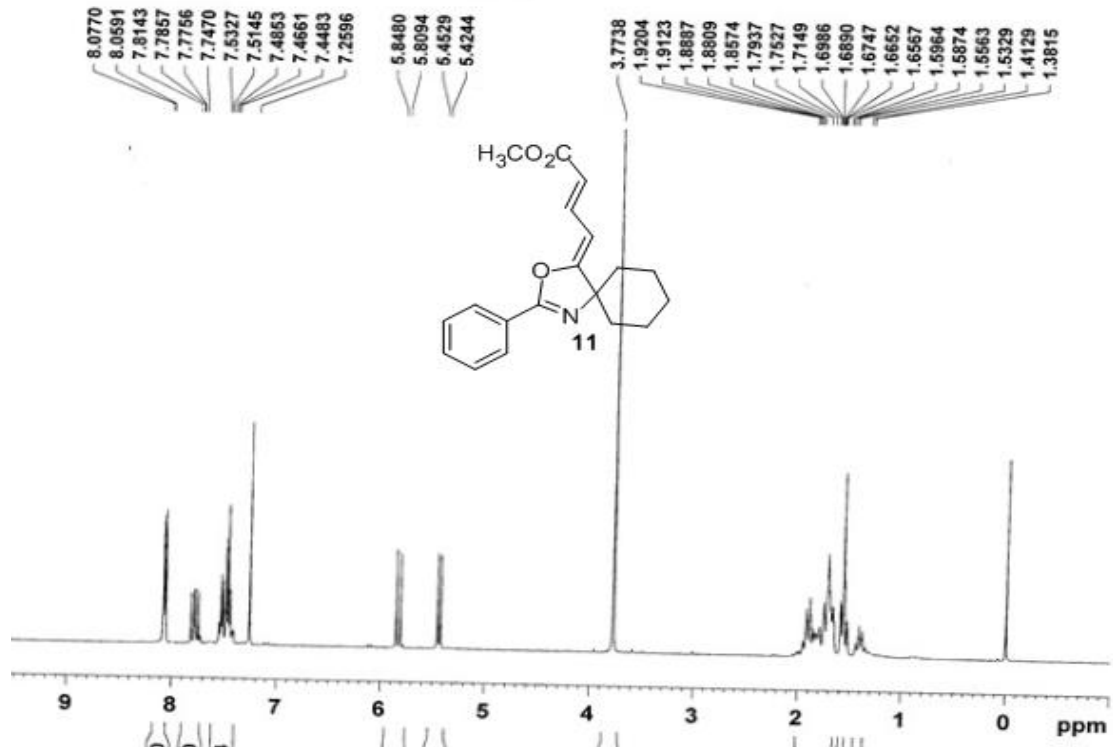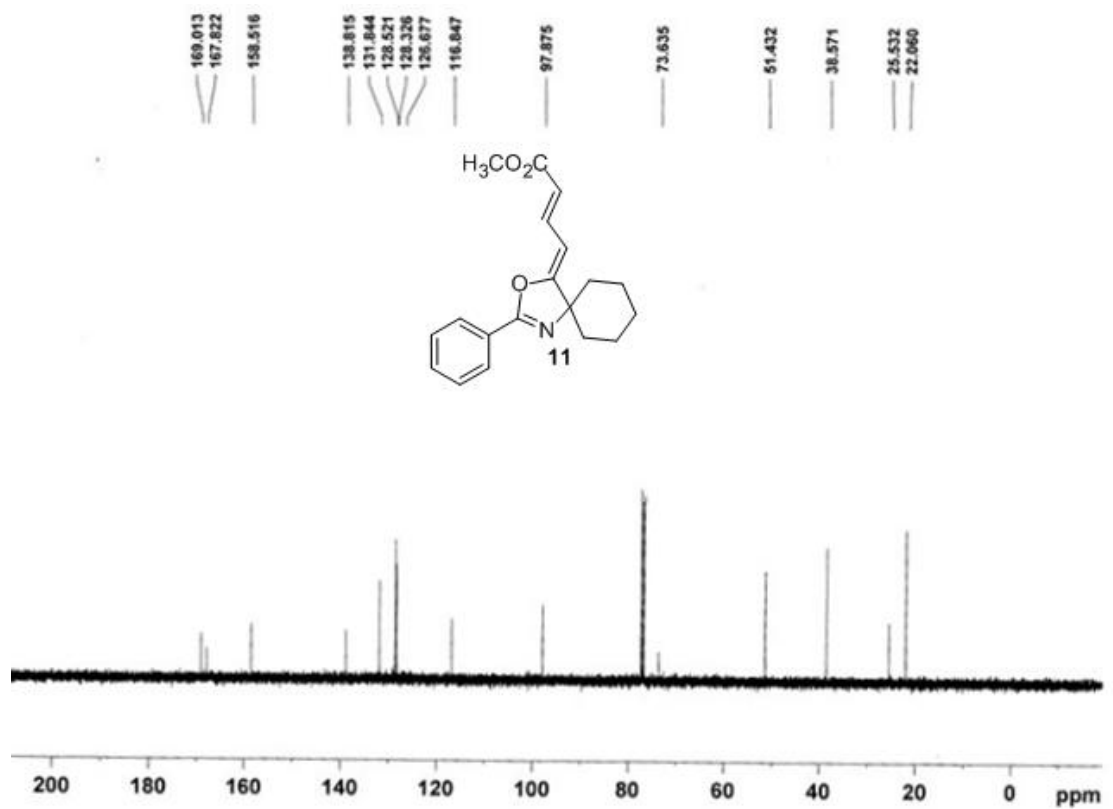

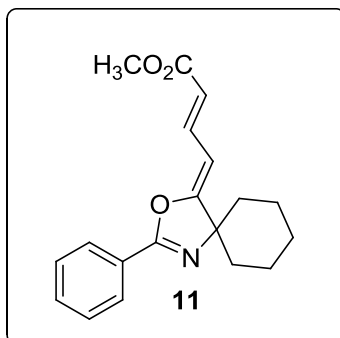

Chemical Formula: C<sub>19</sub>H<sub>21</sub>NO<sub>3</sub>

Exact Mass: 311.1521

Molecular Weight: 311.3749

m/z: 311.1521 (100.0%), 312.1555 (20.5%), 313.1589 (2.0%)

Elemental Analysis: C, 73.29; H, 6.80; N, 4.50; O, 15.41

| Sample Name   | 2015-0105-ZS-167-3H | Position    | P1-B8  | Instrument Name | Instrument 1 | User Name              |                      |
|---------------|---------------------|-------------|--------|-----------------|--------------|------------------------|----------------------|
| Inj Vol       | -1                  | InjPosition |        | SampleType      | Sample       | IRM Calibration Status | Success              |
| Data Filename | 2015-0105-ZS-167-3H | ACQ Method  | 0103.m | Comment         |              | Acquired Time          | 1/5/2015 11:01:43 AM |

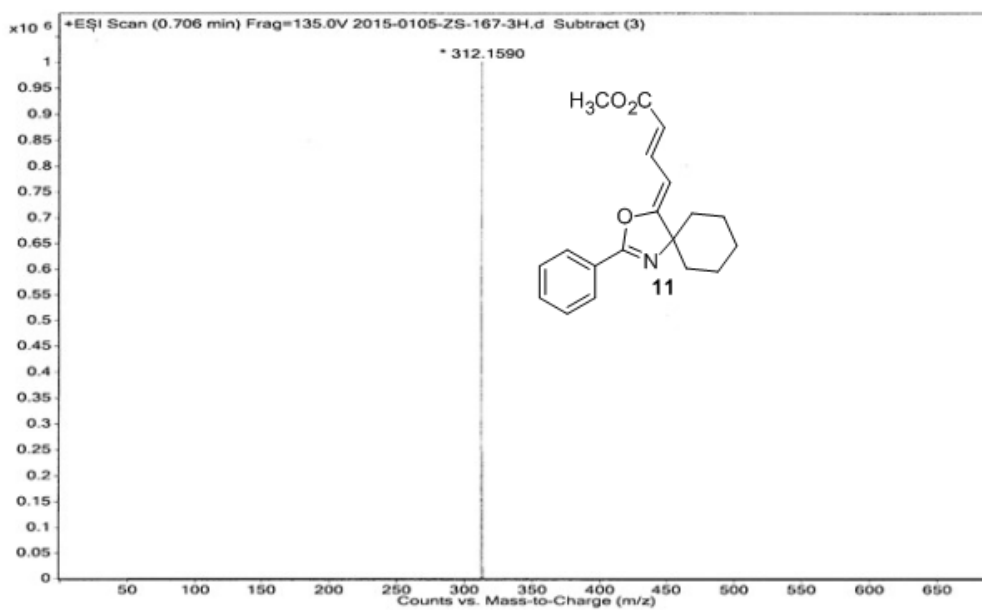

HRMS (ESI, m/z) calcd for C<sub>19</sub>H<sub>21</sub>NO<sub>3</sub> [M+H]<sup>+</sup> **312.1594**, found **312.1590**.

ZS-166-1

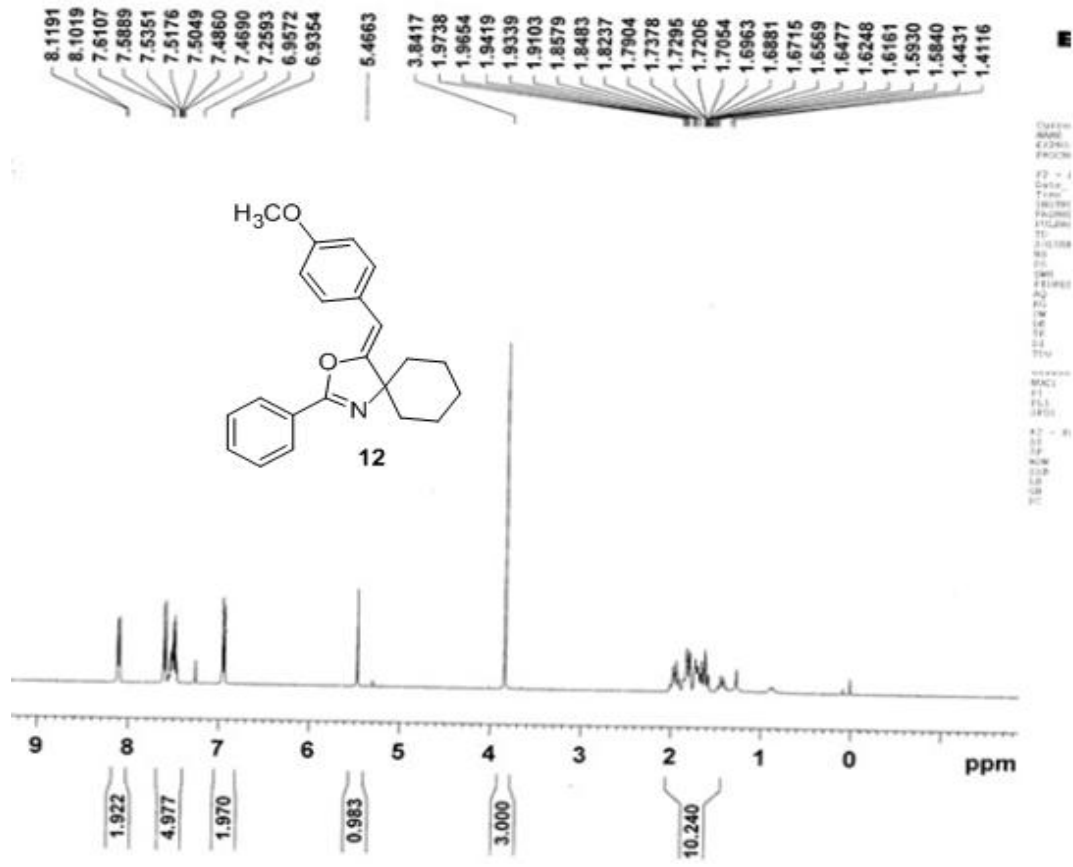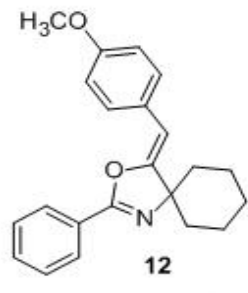

NAME  
EXPNO  
PROCNO  
PROCPS  
F2 - 1  
Date\_   
Time\_   
INSTR   
PROBHD  
PULPROG  
TD  
SOLVENT  
NS  
DS  
SWH  
FIDRES  
AQ  
RG  
K1  
K2  
K3  
K4  
K5  
K6  
K7  
K8  
K9  
K10  
K11  
K12  
K13  
K14  
K15  
K16  
K17  
K18  
K19  
K20  
K21  
K22  
K23  
K24  
K25  
K26  
K27  
K28  
K29  
K30  
K31  
K32  
K33  
K34  
K35  
K36  
K37  
K38  
K39  
K40  
K41  
K42  
K43  
K44  
K45  
K46  
K47  
K48  
K49  
K50  
K51  
K52  
K53  
K54  
K55  
K56  
K57  
K58  
K59  
K60  
K61  
K62  
K63  
K64  
K65  
K66  
K67  
K68  
K69  
K70  
K71  
K72  
K73  
K74  
K75  
K76  
K77  
K78  
K79  
K80  
K81  
K82  
K83  
K84  
K85  
K86  
K87  
K88  
K89  
K90  
K91  
K92  
K93  
K94  
K95  
K96  
K97  
K98  
K99  
K100  
K101  
K102  
K103  
K104  
K105  
K106  
K107  
K108  
K109  
K110  
K111  
K112  
K113  
K114  
K115  
K116  
K117  
K118  
K119  
K120  
K121  
K122  
K123  
K124  
K125  
K126  
K127  
K128  
K129  
K130  
K131  
K132  
K133  
K134  
K135  
K136  
K137  
K138  
K139  
K140  
K141  
K142  
K143  
K144  
K145  
K146  
K147  
K148  
K149  
K150  
K151  
K152  
K153  
K154  
K155  
K156  
K157  
K158  
K159  
K160  
K161  
K162  
K163  
K164  
K165  
K166  
K167  
K168  
K169  
K170  
K171  
K172  
K173  
K174  
K175  
K176  
K177  
K178  
K179  
K180  
K181  
K182  
K183  
K184  
K185  
K186  
K187  
K188  
K189  
K190  
K191  
K192  
K193  
K194  
K195  
K196  
K197  
K198  
K199  
K200  
K201  
K202  
K203  
K204  
K205  
K206  
K207  
K208  
K209  
K210  
K211  
K212  
K213  
K214  
K215  
K216  
K217  
K218  
K219  
K220  
K221  
K222  
K223  
K224  
K225  
K226  
K227  
K228  
K229  
K230  
K231  
K232  
K233  
K234  
K235  
K236  
K237  
K238  
K239  
K240  
K241  
K242  
K243  
K244  
K245  
K246  
K247  
K248  
K249  
K250  
K251  
K252  
K253  
K254  
K255  
K256  
K257  
K258  
K259  
K260  
K261  
K262  
K263  
K264  
K265  
K266  
K267  
K268  
K269  
K270  
K271  
K272  
K273  
K274  
K275  
K276  
K277  
K278  
K279  
K280  
K281  
K282  
K283  
K284  
K285  
K286  
K287  
K288  
K289  
K290  
K291  
K292  
K293  
K294  
K295  
K296  
K297  
K298  
K299  
K300  
K301  
K302  
K303  
K304  
K305  
K306  
K307  
K308  
K309  
K310  
K311  
K312  
K313  
K314  
K315  
K316  
K317  
K318  
K319  
K320  
K321  
K322  
K323  
K324  
K325  
K326  
K327  
K328  
K329  
K330  
K331  
K332  
K333  
K334  
K335  
K336  
K337  
K338  
K339  
K340  
K341  
K342  
K343  
K344  
K345  
K346  
K347  
K348  
K349  
K350  
K351  
K352  
K353  
K354  
K355  
K356  
K357  
K358  
K359  
K360  
K361  
K362  
K363  
K364  
K365  
K366  
K367  
K368  
K369  
K370  
K371  
K372  
K373  
K374  
K375  
K376  
K377  
K378  
K379  
K380  
K381  
K382  
K383  
K384  
K385  
K386  
K387  
K388  
K389  
K390  
K391  
K392  
K393  
K394  
K395  
K396  
K397  
K398  
K399  
K400  
K401  
K402  
K403  
K404  
K405  
K406  
K407  
K408  
K409  
K410  
K411  
K412  
K413  
K414  
K415  
K416  
K417  
K418  
K419  
K420  
K421  
K422  
K423  
K424  
K425  
K426  
K427  
K428  
K429  
K430  
K431  
K432  
K433  
K434  
K435  
K436  
K437  
K438  
K439  
K440  
K441  
K442  
K443  
K444  
K445  
K446  
K447  
K448  
K449  
K450  
K451  
K452  
K453  
K454  
K455  
K456  
K457  
K458  
K459  
K460  
K461  
K462  
K463  
K464  
K465  
K466  
K467  
K468  
K469  
K470  
K471  
K472  
K473  
K474  
K475  
K476  
K477  
K478  
K479  
K480  
K481  
K482  
K483  
K484  
K485  
K486  
K487  
K488  
K489  
K490  
K491  
K492  
K493  
K494  
K495  
K496  
K497  
K498  
K499  
K500  
K501  
K502  
K503  
K504  
K505  
K506  
K507  
K508  
K509  
K510  
K511  
K512  
K513  
K514  
K515  
K516  
K517  
K518  
K519  
K520  
K521  
K522  
K523  
K524  
K525  
K526  
K527  
K528  
K529  
K530  
K531  
K532  
K533  
K534  
K535  
K536  
K537  
K538  
K539  
K540  
K541  
K542  
K543  
K544  
K545  
K546  
K547  
K548  
K549  
K550  
K551  
K552  
K553  
K554  
K555  
K556  
K557  
K558  
K559  
K560  
K561  
K562  
K563  
K564  
K565  
K566  
K567  
K568  
K569  
K570  
K571  
K572  
K573  
K574  
K575  
K576  
K577  
K578  
K579  
K580  
K581  
K582  
K583  
K584  
K585  
K586  
K587  
K588  
K589  
K590  
K591  
K592  
K593  
K594  
K595  
K596  
K597  
K598  
K599  
K600  
K601  
K602  
K603  
K604  
K605  
K606  
K607  
K608  
K609  
K610  
K611  
K612  
K613  
K614  
K615  
K616  
K617  
K618  
K619  
K620  
K621  
K622  
K623  
K624  
K625  
K626  
K627  
K628  
K629  
K630  
K631  
K632  
K633  
K634  
K635  
K636  
K637  
K638  
K639  
K640  
K641  
K642  
K643  
K644  
K645  
K646  
K647  
K648  
K649  
K650  
K651  
K652  
K653  
K654  
K655  
K656  
K657  
K658  
K659  
K660  
K661  
K662  
K663  
K664  
K665  
K666  
K667  
K668  
K669  
K670  
K671  
K672  
K673  
K674  
K675  
K676  
K677  
K678  
K679  
K680  
K681  
K682  
K683  
K684  
K685  
K686  
K687  
K688  
K689  
K690  
K691  
K692  
K693  
K694  
K695  
K696  
K697  
K698  
K699  
K700  
K701  
K702  
K703  
K704  
K705  
K706  
K707  
K708  
K709  
K710  
K711  
K712  
K713  
K714  
K715  
K716  
K717  
K718  
K719  
K720  
K721  
K722  
K723  
K724  
K725  
K726  
K727  
K728  
K729  
K730  
K731  
K732  
K733  
K734  
K735  
K736  
K737  
K738  
K739  
K740  
K741  
K742  
K743  
K744  
K745  
K746  
K747  
K748  
K749  
K750  
K751  
K752  
K753  
K754  
K755  
K756  
K757  
K758  
K759  
K760  
K761  
K762  
K763  
K764  
K765  
K766  
K767  
K768  
K769  
K770  
K771  
K772  
K773  
K774  
K775  
K776  
K777  
K778  
K779  
K780  
K781  
K782  
K783  
K784  
K785  
K786  
K787  
K788  
K789  
K790  
K791  
K792  
K793  
K794  
K795  
K796  
K797  
K798  
K799  
K800  
K801  
K802  
K803  
K804  
K805  
K806  
K807  
K808  
K809  
K810  
K811  
K812  
K813  
K814  
K815  
K816  
K817  
K818  
K819  
K820  
K821  
K822  
K823  
K824  
K825  
K826  
K827  
K828  
K829  
K830  
K831  
K832  
K833  
K834  
K835  
K836  
K837  
K838  
K839  
K840  
K841  
K842  
K843  
K844  
K845  
K846  
K847  
K848  
K849  
K850  
K851  
K852  
K853  
K854  
K855  
K856  
K857  
K858  
K859  
K860  
K861  
K862  
K863  
K864  
K865  
K866  
K867  
K868  
K869  
K870  
K871  
K872  
K873  
K874  
K875  
K876  
K877  
K878  
K879  
K880  
K881  
K882  
K883  
K884  
K885  
K886  
K887  
K888  
K889  
K890  
K891  
K892  
K893  
K894  
K895  
K896  
K897  
K898  
K899  
K900  
K901  
K902  
K903  
K904  
K905  
K906  
K907  
K908  
K909  
K910  
K911  
K912  
K913  
K914  
K915  
K916  
K917  
K918  
K919  
K920  
K921  
K922  
K923  
K924  
K925  
K926  
K927  
K928  
K929  
K930  
K931  
K932  
K933  
K934  
K935  
K936  
K937  
K938  
K939  
K940  
K941  
K942  
K943  
K944  
K945  
K946  
K947  
K948  
K949  
K950  
K951  
K952  
K953  
K954  
K955  
K956  
K957  
K958  
K959  
K960  
K961  
K962  
K963  
K964  
K965  
K966  
K967  
K968  
K969  
K970  
K971  
K972  
K973  
K974  
K975  
K976  
K977  
K978  
K979  
K980  
K981  
K982  
K983  
K984  
K985  
K986  
K987  
K988  
K989  
K990  
K991  
K992  
K993  
K994  
K995  
K996  
K997  
K998  
K999  
K1000

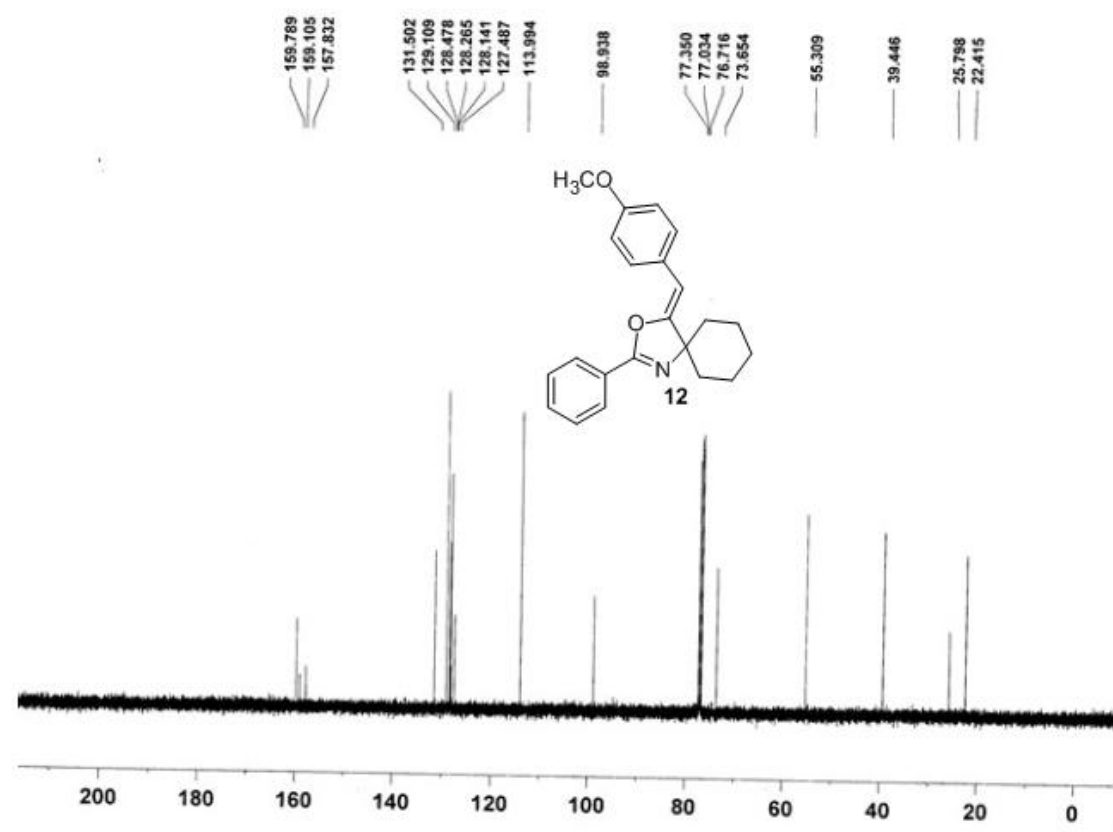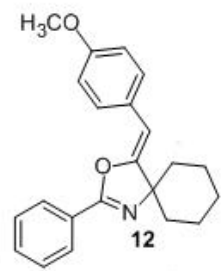

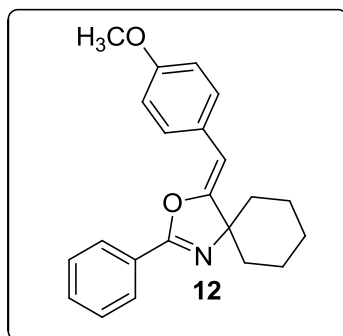

Chemical Formula:  $C_{22}H_{23}NO_2$

Exact Mass: 333.1729

Molecular Weight: 333.4235

m/z: 333.1729 (100.0%), 334.1762 (23.8%), 335.1796 (2.7%)

Elemental Analysis: C, 79.25; H, 6.95; N, 4.20; O, 9.60

| Sample Name   | 2015-0105-25-166-1   | Position    | P1-09  | Instrument Name | Instrument 1 | User Name              |                      |
|---------------|----------------------|-------------|--------|-----------------|--------------|------------------------|----------------------|
| Inj Vol       | -1                   | InjPosition | 0103.m | SampleType      | Sample       | IRM Calibration Status | Success              |
| Data Filename | 2015-0105-25-166-1.d | ACQ Method  |        | Comment         |              | Acquired Time          | 1/5/2015 10:36:34 AM |

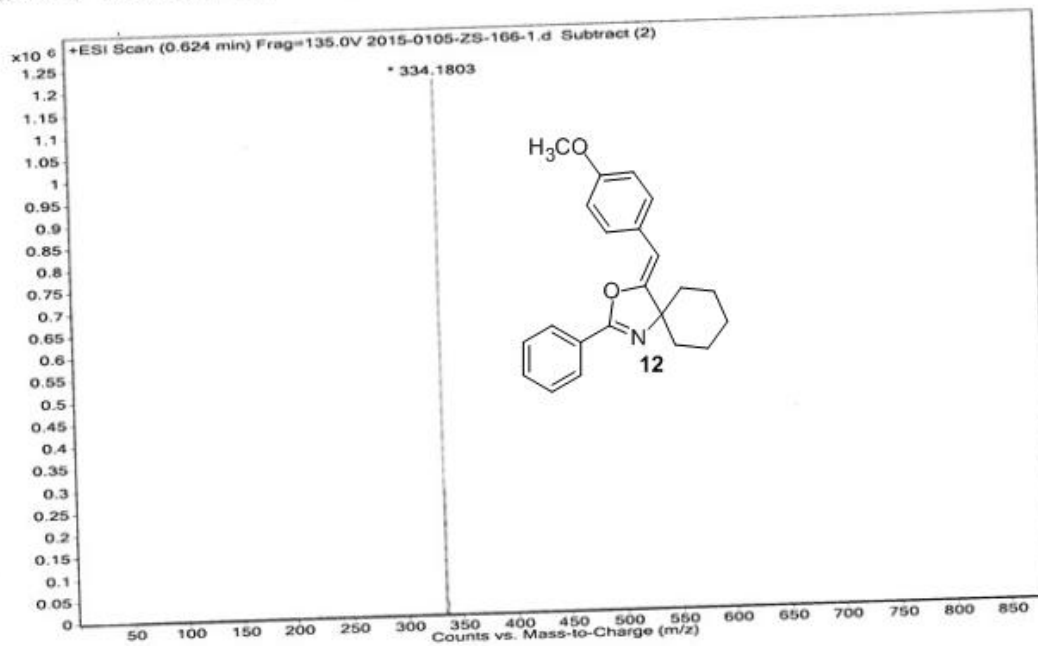

HRMS (ESI, m/z) calcd for  $C_{22}H_{23}NO_2 [M+H]^+$  **334.1802**, found **334.1803**.



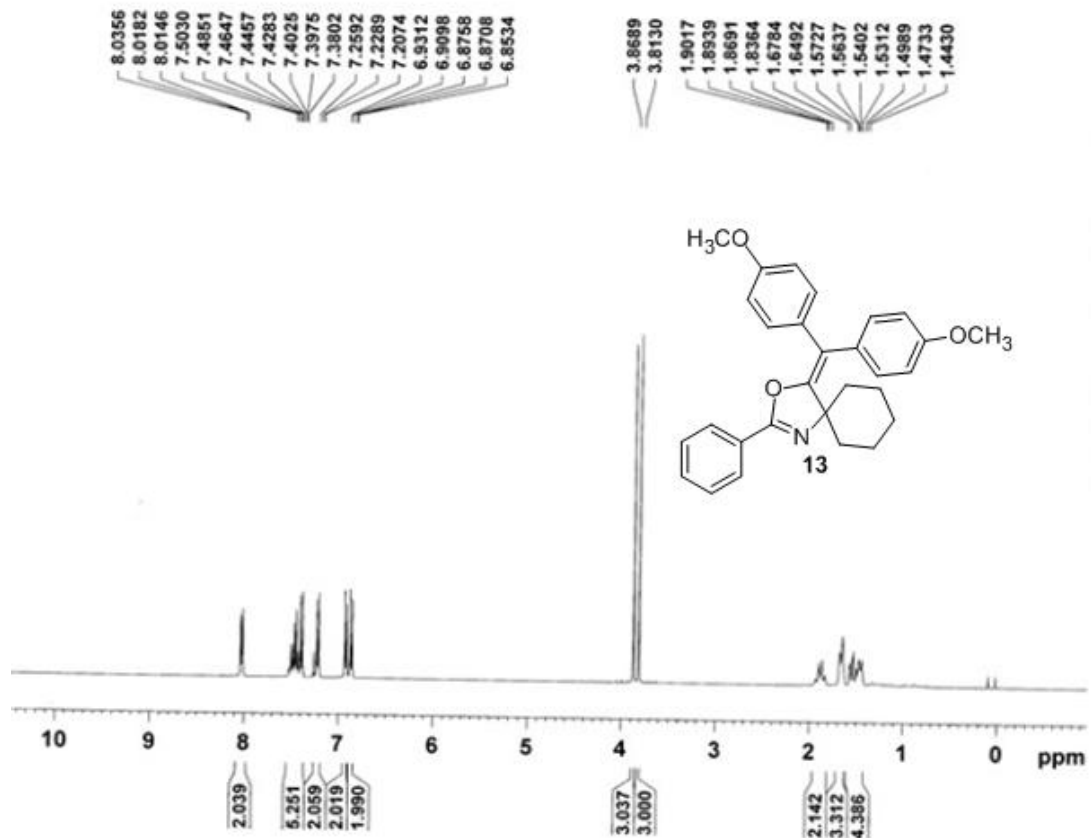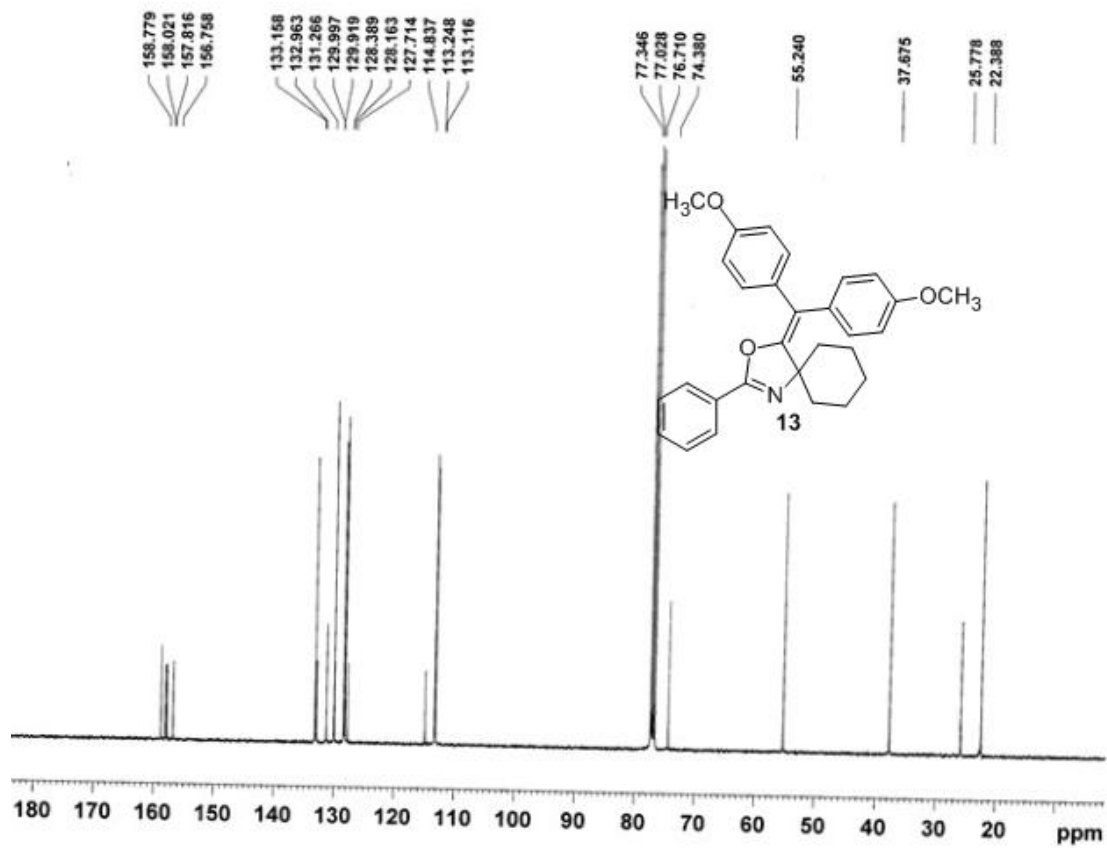

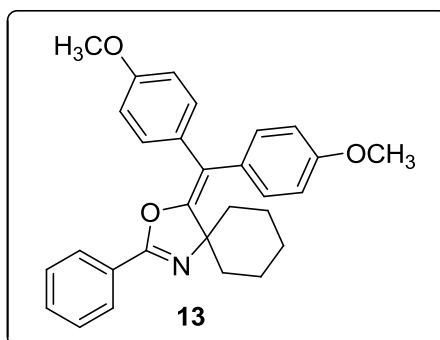

Chemical Formula: C<sub>28</sub>H<sub>26</sub>NO<sub>2</sub>

Exact Mass: 408.1964

Molecular Weight: 408.5115

m/z: 408.1964 (100.0%), 409.1997 (30.3%), 410.2031 (4.4%)

Elemental Analysis: C, 82.32; H, 6.42; N, 3.43; O, 7.83

| Sample Name   | 2015-0105-ZS-161-2   | Position    | P1-F8  | Instrument Name | Instrument 1 | User Name              |                      |
|---------------|----------------------|-------------|--------|-----------------|--------------|------------------------|----------------------|
| Inj Vol       | -1                   | InjPosition |        | SampleType      | Sample       | IRN Calibration Status | Success              |
| Data Filename | 2015-0105-ZS-161-2.d | Acq Method  | 0103.m | Comment         |              | Acquired Time          | 1/5/2015 10:50:32 AM |

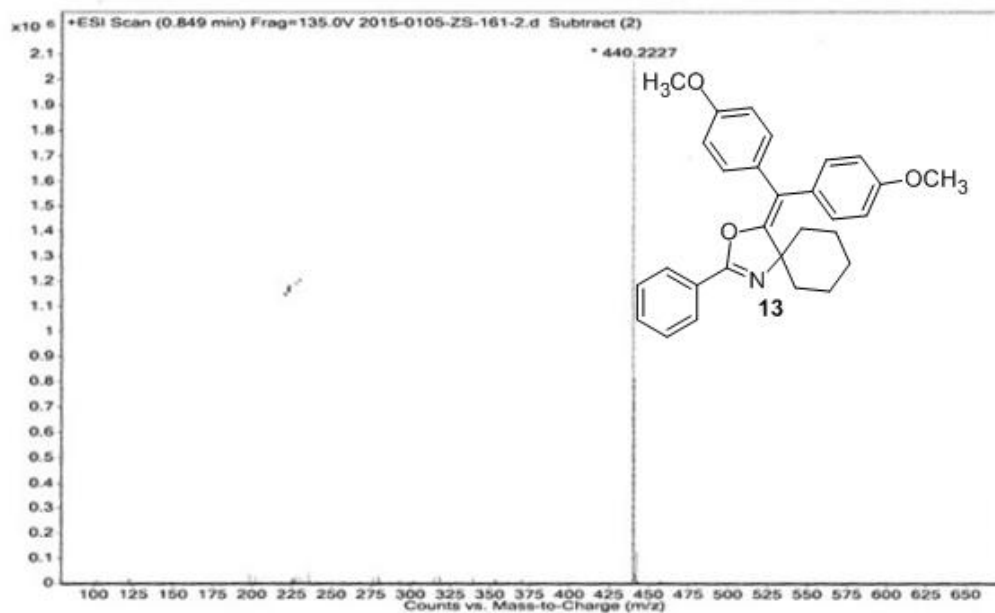

HRMS (ESI, m/z) calcd for C<sub>29</sub>H<sub>29</sub>NO<sub>3</sub> [M+H]<sup>+</sup> **440.2220**, found 440.2227.

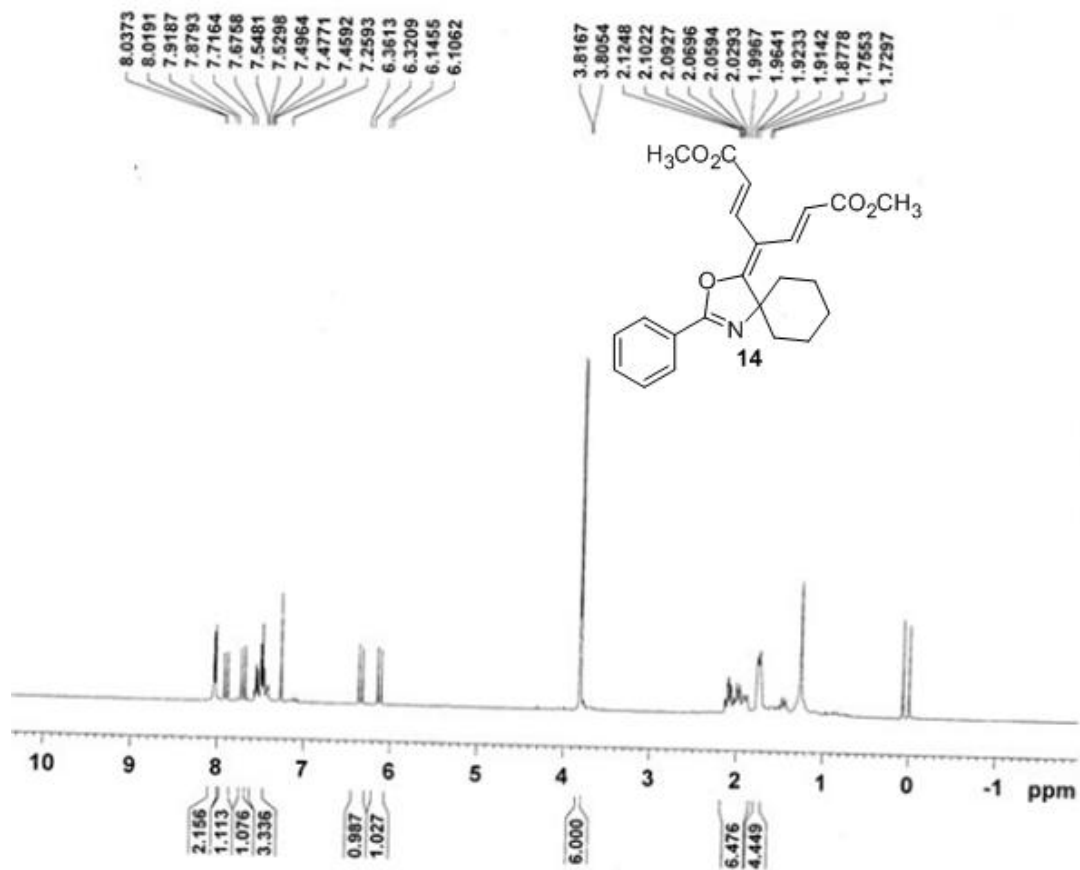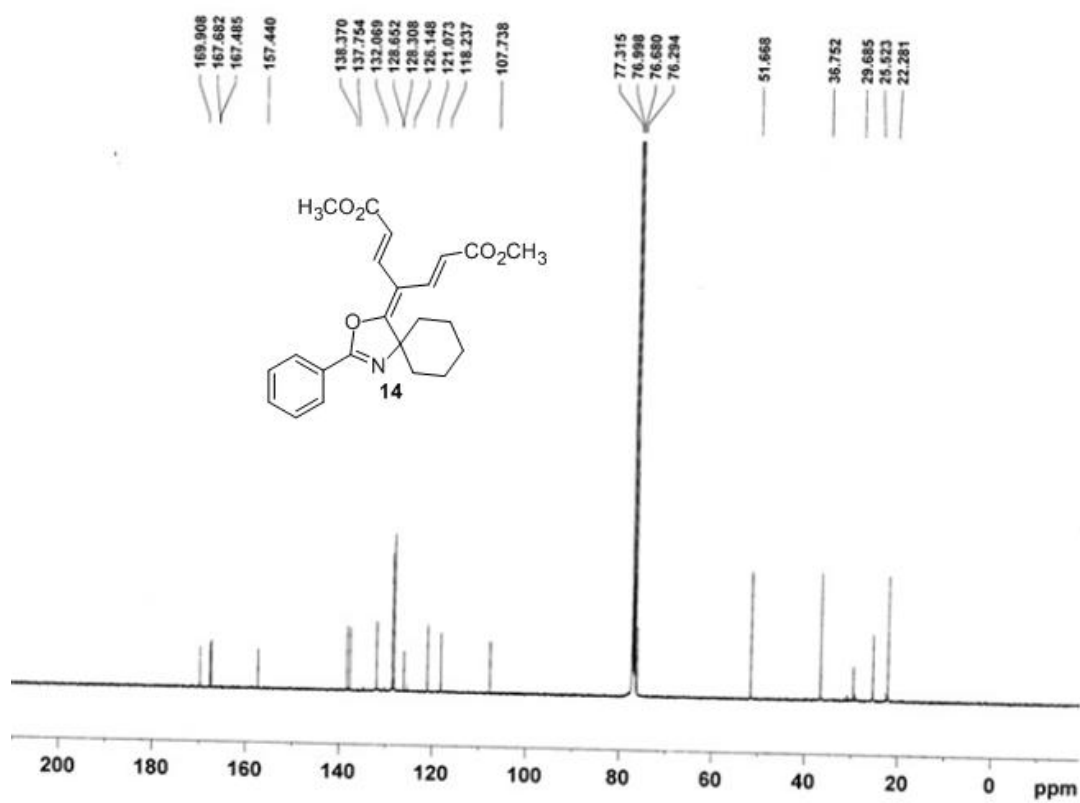

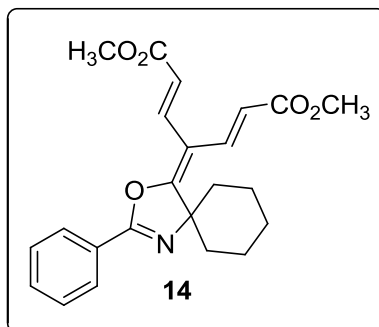

Chemical Formula:  $C_{23}H_{25}NO_5$

Exact Mass: 395.1733

Molecular Weight: 395.4483

m/z: 395.1733 (100.0%), 396.1766 (24.9%), 397.1800 (3.0%), 397.1775 (1.0%)

Elemental Analysis: C, 69.86; H, 6.37; N, 3.54; O, 20.23

| Sample Name   | 2015-0105-ZS-165-1   | Position    | P1-89  | Instrument Name | Instrument 1 | User Name              |                      |
|---------------|----------------------|-------------|--------|-----------------|--------------|------------------------|----------------------|
| Inj Vol       | -1                   | InjPosition |        | SampleType      | Sample       | IRM Calibration Status | Success              |
| Data Filename | 2015-0105-ZS-165-1.d | ACQ Method  | 0103.m | Comment         |              | Acquired Time          | 1/5/2015 10:41:01 AM |

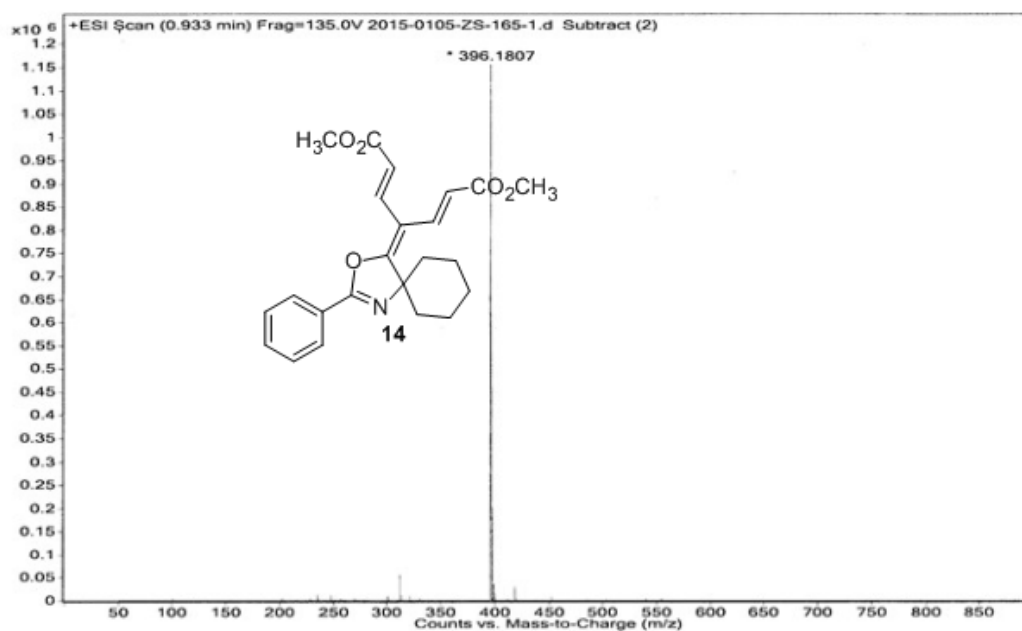

HRMS (ESI, m/z) calcd for  $C_{23}H_{25}NO_5 [M+H]^+$  **396.1805**, found **396.1807**.

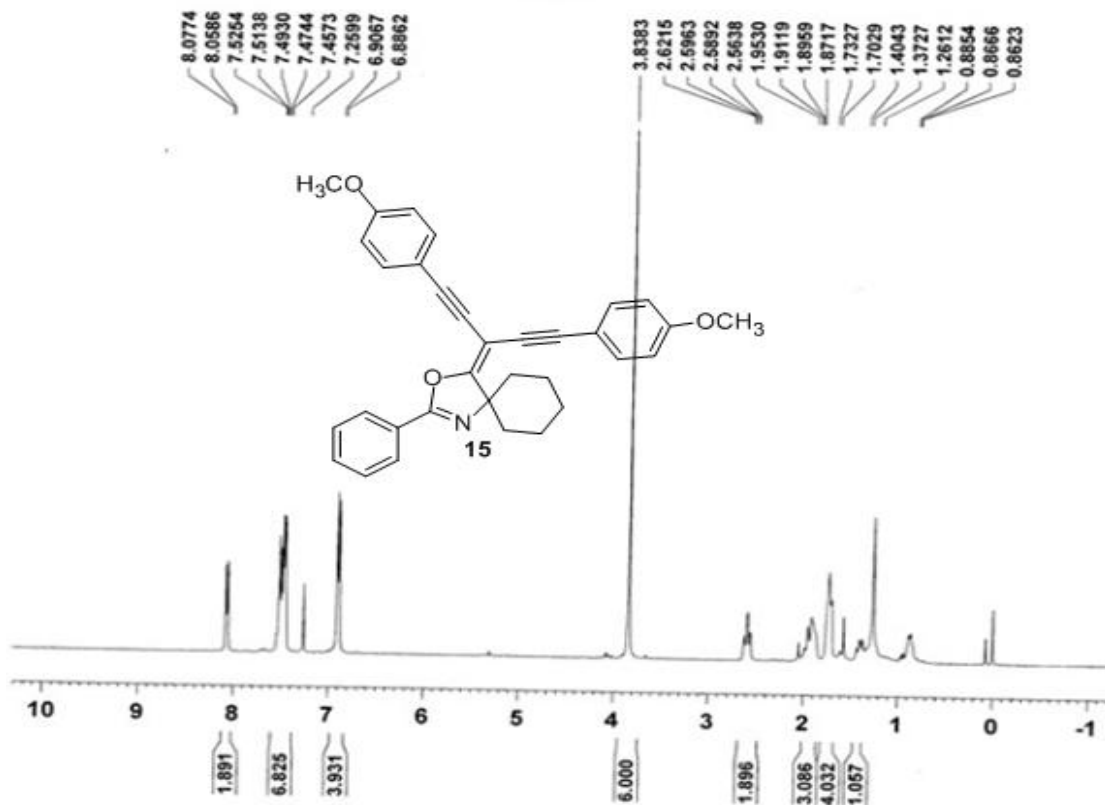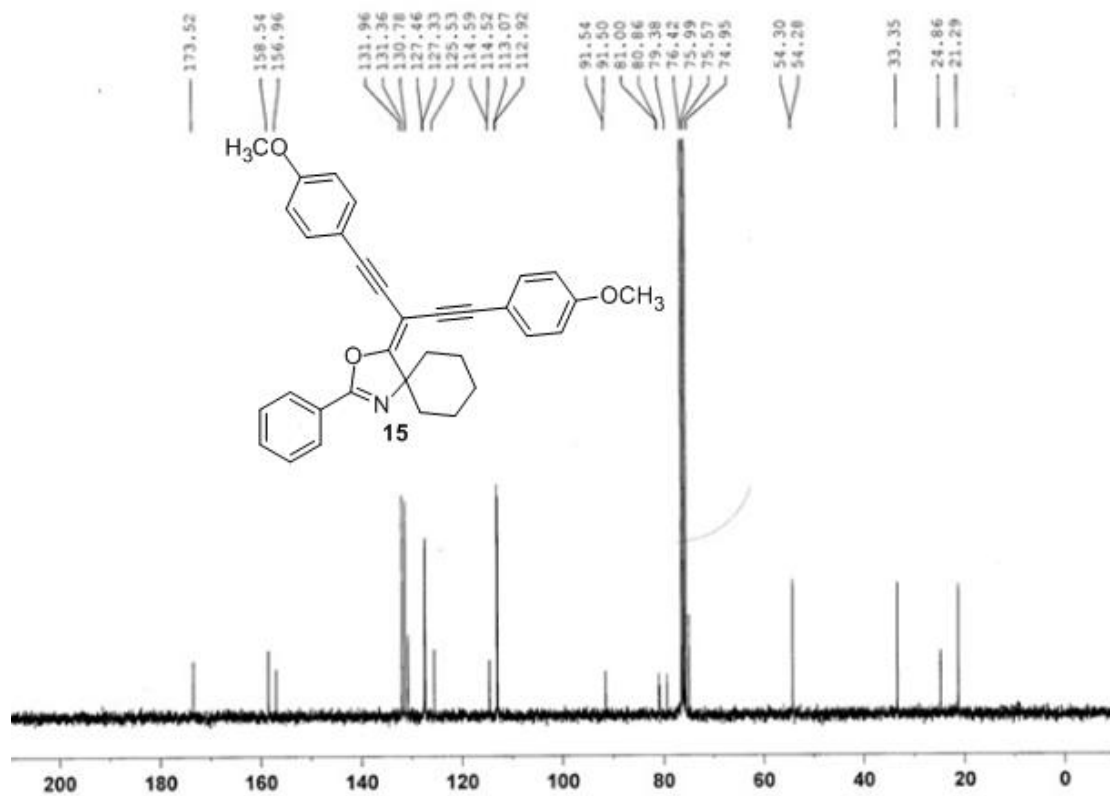

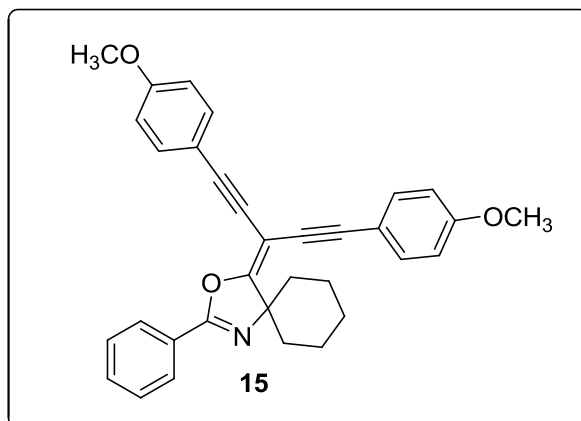

Chemical Formula:  $C_{33}H_{29}NO_3$

Exact Mass: 487.2147

Molecular Weight: 487.5883

$m/z$ : 487.2147 (100.0%), 488.2181 (35.7%), 489.2215 (6.2%)

Elemental Analysis: C, 81.29; H, 5.99; N, 2.87; O, 9.84

**State Key Laboratory of Organometallic Chemistry  
Shanghai Institute of Organic Chemistry  
Chinese Academy of Sciences  
ESI High Resolution MS Date Report**

Data Filename: wpl-2S-4-2.d  
Sample Name: wpl-2S-4-2  
User Name:  
Acquired Time: 1/20/2015 2:22:37 PM  
Instrument: Agilent Technologies 6224 TOF LC/MS

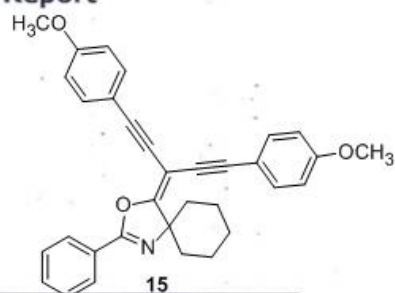

**User Spectra**

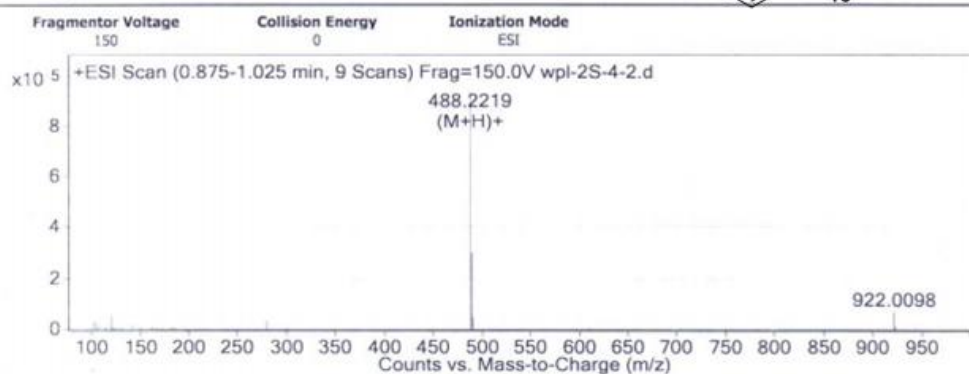

HRMS (ESI,  $m/z$ ) calcd for  $C_{33}H_{29}NO_3$   $[M+H]^+$  **488.2220**, found **488.2219**.
